# Supplementary material
Source: PubMed Central journal article supplement (PMC7751123)
Supplement: 12916_2020_1857_MOESM1_ESM.pdf [file 12916_2020_1857_MOESM1_ESM.pdf]

|    |                                                                                                          |           |
|----|----------------------------------------------------------------------------------------------------------|-----------|
| 1  | <b>Oral rehydration therapies in Senegal, Mali, and Sierra Leone: a spatial analysis of changes over</b> |           |
| 2  | <b>time and implications for policy</b>                                                                  |           |
| 3  | <b>Additional file 1: Contents</b>                                                                       |           |
| 4  | <b>0.0 GATHER compliance.....</b>                                                                        | <b>2</b>  |
| 5  | <b>1.0 Case definition of modelled outputs .....</b>                                                     | <b>2</b>  |
| 6  | <b>1.1 Any oral rehydration solution (‘any ORS’).....</b>                                                | <b>2</b>  |
| 7  | <b>1.2 Only recommended home fluids (‘only RHF’).....</b>                                                | <b>2</b>  |
| 8  | <b>1.3 No oral rehydration therapy (‘no ORT’).....</b>                                                   | <b>2</b>  |
| 9  | <b>2.0 Data.....</b>                                                                                     | <b>3</b>  |
| 10 | <b>2.1 Summary of included data sources .....</b>                                                        | <b>3</b>  |
| 11 | <b>2.2 Aggregation to finest possible geography .....</b>                                                | <b>3</b>  |
| 12 | <b>2.3 Creation of pseudo-points within areal units .....</b>                                            | <b>3</b>  |
| 13 | <b>2.4 Assigning covariates to points.....</b>                                                           | <b>3</b>  |
| 14 | <b>2.5 Administrative boundaries.....</b>                                                                | <b>3</b>  |
| 15 | <b>3.0 Geostatistical model.....</b>                                                                     | <b>4</b>  |
| 16 | <b>3.1 Model geographies and years.....</b>                                                              | <b>4</b>  |
| 17 | <b>3.2 Ensemble covariate modelling via stacked generalisation .....</b>                                 | <b>4</b>  |
| 18 | <b>3.3 Geostatistical model.....</b>                                                                     | <b>4</b>  |
| 19 | <b>3.4 Priors .....</b>                                                                                  | <b>5</b>  |
| 20 | <b>3.5 Mesh creation .....</b>                                                                           | <b>5</b>  |
| 21 | <b>3.6 Fitted parameters and estimate generation .....</b>                                               | <b>6</b>  |
| 22 | <b>4.0 Model vetting and validation .....</b>                                                            | <b>6</b>  |
| 23 | <b>4.1 Vetting stacker models and time trends.....</b>                                                   | <b>6</b>  |
| 24 | <b>4.2 In-sample validation .....</b>                                                                    | <b>6</b>  |
| 25 | <b>4.3 Out-of-sample validation.....</b>                                                                 | <b>6</b>  |
| 26 | <b>5.0 Policy changes, interventions, and events.....</b>                                                | <b>7</b>  |
| 27 | <b>5.1 Sierra Leone .....</b>                                                                            | <b>7</b>  |
| 28 | <b>5.2 Mali .....</b>                                                                                    | <b>8</b>  |
| 29 | <b>5.3 Senegal .....</b>                                                                                 | <b>9</b>  |
| 30 | <b>6.0 Additional file 1: Figures.....</b>                                                               | <b>10</b> |
| 31 | <b>7.0 Additional file 1: Tables .....</b>                                                               | <b>21</b> |
| 32 | <b>8.0 Additional file 1: References.....</b>                                                            | <b>61</b> |

## 33 **0.0 GATHER compliance**

34 Please see Additional file 1: Table S1 for discussion on how this study meets the conditions for GATHER  
35 guidelines.  
36

### 37 **1.0 Case definition of modelled outputs**

#### 38 **1.1 Any oral rehydration solution ('any ORS')**

39 The 'any ORS' category corresponded to children who received only ORS as well as children who received both  
40 ORS and RHF (see below). ORS was defined as a pre-packaged electrolyte solution containing glucose or another  
41 form of sugar or starch, as well as sodium, chloride, potassium, and bicarbonate or citrate. This included reduced  
42 osmolarity ORS (total osmolarity  $\leq 250$  mmol/l) and higher osmolarity ORS (up to 370 mmol/l) (1). Diarrhea was  
43 defined as a child having had three or more abnormally loose or watery stools within a 24-hour period.  
44

45 The modelled output was the *proportion of children under 5 years-old (under-5) with diarrhea that received any*  
46 *ORS*, and corresponded to the following survey questions that were asked about children who had diarrhea in the  
47 previous 2 weeks (14 days):

- 48 • Did child receive a special packet called [local name for solution]?
- 49 • Did child receive a pre-packaged ORS liquid?
- 50 • This included any pre-made ORS solution, with designations such as "*oral rehydration solution*", "*ors*",  
51 "*sro*", "*serum from pharmacy*", "*soro*", "*suero*", "*pre-packaged*", "*special packet*", "*pedialyte*".  
52

#### 53 **1.2 Only recommended home fluids ('only RHF')**

54 The 'only RHF' category corresponded to children who received RHF but did not receive any ORS. RHF were  
55 defined as all possible home fluid alternatives, including but not limited to sugar-salt solution, cereal-salt solution,  
56 rice-water solution, and additional fluids, such as plain water, juice, tea, or rice water. The only solution that is  
57 consistently not included in the "recommended fluid" definition is soda (1).  
58

59 The modelled output was the *proportion of children under-5 with diarrhea that received only RHF*, and  
60 corresponded to the following survey questions that were asked about children who had had diarrhea in the previous  
61 2 weeks (14 days):

- 62 • Did child receive government-recommended home fluids?
- 63 • Did child receive any other fluid-based treatment [written in or listed]?
- 64 • This includes any home fluid that may increase hydration, with designations such as "*recommended home*  
65 *solution*", "*suero casero*", "*sugar and salt solution*", "*cereal-water*", "*sweetened*", "*salted*", "*rice*  
66 *water*", "*soup*", "*fruit juice*", "*yoghurt-based drink*", "*tea*".  
67

68 Given the broad range in RHF definitions between countries, in addition to the fact that survey questions change  
69 over time and between survey series, we performed an analysis to adjust all "non-standard" RHF survey questions to  
70 a "standard" question. RHF questions were classified as including phrasing that fell into categories of 1)  
71 recommended or acceptable home fluids, 2) sugar and salt solutions, 3) other home fluids, and/or 4) other liquid  
72 foods, for a total of 16 different possible definition combinations. The "standard" questionnaires were ones that  
73 asked only about category 1, recommended or acceptable home fluids, which was found most frequently across all  
74 surveys. We fit a logistic regression model to surveys across all low- and middle-income countries (LMICs) in the  
75 analysis, using data and methods from our previous study (2), regressing coverage on definition, country-level fixed  
76 effects, and a natural cubic spline on survey year. Coverage reported by non-standard surveys was adjusted by the  
77 coefficient of the fixed effect for the non-standard definition in logit space. See Additional file 1: Table S3 for the  
78 resulting RHF coverage adjustments.  
79

#### 80 **1.3 No oral rehydration therapy ('no ORT')**

81 The 'no ORT' category corresponded to all children that did not fall into either of the above categories (i.e., that did  
82 not receive ORS or RHF). ORT was defined as any form of oral rehydration treatment, including treatment with  
83 either ORS, RHF, or both. The modelled output was the *proportion of children under-5 with diarrhea that received*

84 *neither ORS nor RHF*. It was modelled using the ORS and RHF survey data described above. It was also adjusted  
85 for differences in RHF survey questions using the methods described in section 1.2. See Additional file 1: Table S4  
86 for the resulting ORT coverage adjustments.  
87

## 88 **2.0 Data**

### 89 **2.1 Summary of included data sources**

90 We collected data from national, population-based household surveys in Mali, Senegal, and Sierra Leone. For a  
91 survey to be considered for this analysis, we required that it provide geography information more granular than the  
92 national level, had data collected during the time frame of 2000 to 2018, provided survey weights if the survey was  
93 not self-weighted, provided data on whether a child had diarrhea in the weeks prior to the survey and data on  
94 whether children who had diarrhea had received ORS and RHF as treatment. This included 6 surveys in Sierra  
95 Leone from 2000 to 2017, 6 surveys in Mali from 2001 to 2018, and 9 surveys in Senegal from 2000 to 2017  
96 (Additional file 1: Table S2).  
97

### 98 **2.2 Aggregation to finest possible geography**

99 We aggregated/summarized the individual-level microdata to the finest possible spatial resolution available—  
100 preferably, a latitude and longitude pair representing the location of the survey cluster/primary sampling unit. Where  
101 point-level referencing was not available, we matched survey microdata to the smallest polygon/areal unit possible.  
102 We calculated the effective sample size for each spatial aggregation (point and polygon) via the Kish approximation  
103 considering the underlying complex survey design (3). After aggregation, the adjustments described below (sections  
104 2.3–2.4) were applied.  
105

### 106 **2.3 Creation of pseudo-points within areal units**

107 We created pseudo-points for areal data via a population-weighted resampling process as our desired model requires  
108 data of a single geometric type (e.g., latitude/longitude point). Specifically, we randomly generated 10 000 candidate  
109 points from within each areal unit using the WorldPop total population raster as a spatial distribution weight (4). K-  
110 means clustering was performed to aggregate candidate points into the pseudo-points used for modelling. These  
111 pseudo-points were assigned analytical weights proportional to the number of candidate points that entered into the  
112 k-means cluster. Each pseudo-point generated by this process was assigned the ORS coverage observed from the  
113 survey for that polygon.  
114

### 115 **2.4 Assigning covariates to points**

116 We compiled 15 covariates that were indexed at the subnational level and had conceivable relationships with ORT:  
117 Access to cities, ratio of children dependents (age 0 to 14) to working adults (age 15 to 64), distance from rivers or  
118 lakes, night-time lights<sup>TV</sup>, elevation, number of children under 5 per woman of childbearing age, total population<sup>TV</sup>,  
119 aridity<sup>TV</sup>, urban or rural<sup>TV</sup>, urban proportion of the location<sup>TV</sup>, irrigation, number of people whose daily vitamin A  
120 needs could be met, prevalence of under-5 stunting<sup>TV</sup>, prevalence of under-5 wasting<sup>TV</sup>, and maternal education<sup>TV</sup>  
121 (TV = time-varying covariates). We also included the Healthcare Access and Quality Index (5) and the proportion of  
122 pregnant women who received four or more antenatal care visits as national-level time-varying covariates. We  
123 filtered these covariates for multi-collinearity within each country using variance inflation factor (VIF) (6) analysis  
124 using a threshold of  $VIF < 3$ . Additional file 1: Table S5 lists the source information for the covariates and  
125 Additional file 1: Table S6 shows the final covariates selected for each region following VIF analysis. Once  
126 assembled, we conducted a spatial query to match covariate values spatially and temporally to our collection of  
127 points and pseudo points. For numerical stability, all covariates were centered and scaled to mean 0, with a standard  
128 deviation of 1.

### 129 **2.5 Administrative boundaries**

131 For this analysis we use shapefiles from the Database of Global Administrative Areas (GADM) (7) to define  
132 relevant country and subnational/administrative boundaries. We made slight adjustments to ensure proper nesting of

133 administrative units, and made larger adjustments in the Democratic Republic of the Congo and India where  
 134 collaborators in these countries had indicated mistakes in administrative boundaries in the shapefiles.  
 135

### 136 3.0 Geostatistical model

#### 137 3.1 Model geographies and years

138 We ran models separately for Mali, Senegal, and Sierra Leone. In addition, we ran models from the first year of data  
 139 to the last year of data, corresponding to 2000 to 2017 for Senegal and Sierra Leone and 2001 to 2018 for Mali. This  
 140 ensured that our estimates were anchored in data and prevented the need to interpolate forward or backward in time.  
 141 An overview of the modelling strategy can be found in Additional file 1: Figure S1.  
 142

#### 143 3.2 Ensemble covariate modelling via stacked generalisation

144 We used a stacked generalisation ensemble model framework to capture non-linear effects and complex interactions  
 145 among our covariates (8). For each region (see section 3.1), we fit three child models to our dataset: a generalised  
 146 additive model (GAM), a penalised regression with the elastic net penalty, and a boosted regression tree (BRT). As  
 147 described below in section 3.3, we use a spatio-temporal Gaussian process regression as the parent ensemble.  
 148

149 Parameters for the GAM model (spline type and number of knots) were selected by expert priors with a maximum of  
 150 3 knots, and the lambda parameter for the elastic net regression was selected by cross validation. Initial  
 151 hyperparameters for the BRT (namely tree complexity, learning rate, and number of trees) were selected using non-  
 152 parametric Bayesian optimisation over a finite space, where the objective function was the negative mean absolute  
 153 error of the BRT fit (9). See Additional file 1: Table S8 for all initial hyperparameters that were selected by  
 154 modelling region.  
 155

156 Each child model was fit using five-fold cross validation to reduce overfitting, and the out-of-sample predictions  
 157 across the child model hold-outs were compiled into a single set of model predictions. Additionally, each child  
 158 model was fit on 100% of the data and a full set of in-sample predictions were created. The out-of-sample  
 159 predictions per child model were fed to the parent geostatistical model (see section 3.3 below) as covariates for  
 160 fitting while the in-sample predictions from the child models are used during the parent model's prediction step.  
 161

#### 162 3.3 Geostatistical model

163 Binomial count data are modelled within a Bayesian hierarchical modelling framework using a logit link function  
 164 and a spatially- and temporally-explicit hierarchical generalised linear regression model to estimate the point  
 165 prevalence (or coverage) of any ORS, only RHF, or no ORT in each modelling region (see section 3.1). Our model  
 166 was constructed as follows:  
 167

$$168 C_i | p_i, N_i \sim \text{Binomial}(p_i, N_i)$$

$$169 \text{logit}(p_i) = \beta_0 + \mathbf{X}_i \boldsymbol{\beta} + \epsilon_{GP_i} + \epsilon_{ctry_i} + \epsilon_{study_i} + \epsilon_i$$

$$172 \boldsymbol{\Sigma} \boldsymbol{\beta} = \mathbf{1}$$

$$174 \epsilon_i \sim N(0, \sigma_{nug}^2)$$

$$176 \boldsymbol{\epsilon}_{GP} | \boldsymbol{\Sigma}_{\text{space}}, \boldsymbol{\Sigma}_{\text{time}} \sim \text{GP}(0, \boldsymbol{\Sigma}_{\text{space}} \otimes \boldsymbol{\Sigma}_{\text{time}})$$

$$178 \boldsymbol{\Sigma}_{\text{space}} = \sigma^2 \frac{2^{1-\nu}}{\Gamma(\nu)} \times \left( \frac{\sqrt{8}}{\rho_s} \mathbf{D} \right)^\nu \times K_\nu \left( \frac{\sqrt{8}}{\rho_s} \mathbf{D} \right)$$

$$180 \Sigma_{\text{time } j,k} = \rho^{|t_k - t_j|}$$

181

182 For each region, we modelled the number of under-5 children at location-time  $i$ , among a sample size,  $N_i$ , with  
 183 diarrhea who received any ORS, only RHF, or no ORT, respectively, as binomial count data,  $C_i$ . The counts,  $C_i$ ,  
 184 probabilities,  $p_i$ , predictions from the three child models  $\mathbf{X}_i$ , and residual terms  $\epsilon_*$  are all indexed at a space-time  
 185 coordinate. The term  $p_i$  represents both the annual proportion and the annual probability that an individual child will  
 186 receive any ORS, only RHF, or no ORT, respectively, given the child resides at that particular location. The logit of  
 187 annual coverage,  $\text{logit}(p_i)$ , was modelled as a linear combination of the three child models,  $\mathbf{X}_i$ ; a correlated spatio-  
 188 temporal error term,  $\epsilon_{GP_i}$ ; and an independent error term,  $\epsilon_i$ . Coefficients,  $\boldsymbol{\beta}$ , on the child models represent their  
 189 respective predictive weighting in the mean logit link and are constrained to sum to one. The country random effect  
 190 was not used in individual country models, with the exception of India where we set this term to be state-level  
 191 random effects.  $\epsilon_{GP}$ , is modelled as a three-dimensional Gaussian process in space-time centered at zero and with a  
 192 covariance matrix constructed from a Kronecker product of spatial and temporal covariance kernels. The spatial  
 193 covariance,  $\Sigma_{\text{space}}$ , is modelled using a Matérn covariance function (10), and temporal covariance,  $\Sigma_{\text{time}}$ , as an  
 194 autoregressive order 1 (AR1) function represented in the model with 18 annual knots.

195  
 196 This approach leveraged the data's residual correlation structure to more accurately predict coverage estimates for  
 197 locations with no data, while also propagating the dependence in the data through to uncertainty estimates (11). The  
 198 posterior distributions were fit using computationally efficient and accurate approximations in R-INLA (12,13)  
 199 (integrated nested Laplace approximation) with the stochastic partial differential equations (SPDE) (14)  
 200 approximation to the Gaussian process residuals.

201

### 202 3.4 Priors

203 The following priors were used:

- 204 •  $\beta_0 \sim N(\mu = 0, \sigma^2 = 1000)$ ,
- 205 •  $\boldsymbol{\beta} \sim N(\boldsymbol{\mu}, \boldsymbol{\Sigma})$ ,
  - 206 ◦  $\boldsymbol{\mu} = (\frac{1}{3}, \frac{1}{3}, \frac{1}{3})'$
  - 207 ◦  $\boldsymbol{\Sigma} = 1,000 * I_{3 \times 3}$
- 208 •  $\log\left(\frac{1+\rho}{1-\rho}\right) \sim N(\mu = 2, \sigma^2 = 1/(1.2^2))$ ,
- 209 •  $\left(\frac{1}{\sigma_{\text{country}}^2}\right) \sim \text{gamma}(\alpha = 4, \gamma = 4)$ ,
- 210 •  $\left(\frac{1}{\sigma_{\text{study}}^2}\right) \sim \text{gamma}(\alpha = 1, \gamma = 0.00005)$ ,
- 211 •  $\left(\frac{1}{\sigma_{\text{nugget}}^2}\right) \sim \text{gamma}(\alpha = 1, \gamma = 0.00005)$ ,

212 We used a "penalized complexity" prior (15) for the marginal standard deviation,  $\sigma$ , and spatial range,  $\rho_s$ , of the  
 213 spatio-temporal Gaussian process,  $\boldsymbol{\Sigma}_{\text{space}}$ . The priors for these parameters were specified such that  $\Pr(\sigma > 3) = 0.05$   
 214 and  $\Pr(\rho_s < X) = 0.05$ , where  $X$  was 5% of the max extent of the mesh for each modelling region ( $X$  corresponded to  
 215 0.76 in Sierra Leone, 1.42 in Mali, and 0.91 in Senegal).

216  
 217 The mean ( $\mu$ ) and variance ( $\sigma^2$ ) parameters for the hyperpriors selected by INLA for the meshes in each region can  
 218 be found in Additional file 1: Table S5. In our parameterisation we represent  $\alpha$  and  $\gamma$  in the *gamma* distribution as  
 219 rate and shape, respectively. The starting set of hyperparameters were selected using INLA defaults, as well as a  
 220 previously performed sensitivity analysis (16). From this initial set, we modified the prior on the variance of the  
 221 country random effects to allow high levels of variation between countries due to the strong effect that national-level  
 222 policies may have on ORS and RHF coverage.

223

### 224 3.5 Mesh creation

225 We constructed the finite elements mesh for the stochastic partial differential equation approximation to the  
 226 Gaussian process regression using a simplified polygon boundary (in which coastlines and complex boundaries were  
 227 smoothed) for each of the regions within our model. This paper uses an improved mesh that is constructed on the S2  
 228 domain. This allows distance to be calculated along the sphere instead of using Euclidean distance between latitude  
 229 and longitude coordinates. This mesh also generates denser vertices in data rich areas. We set the minimum triangle

230 edge length to 25 kilometres, the maximum triangle length to 1 000 kilometres, with the mesh extending 500  
231 kilometres past the region’s boundary.  
232

### 233 3.6 Fitted parameters and estimate generation

234 Fitted parameters and hyperparameters, as well as their 95% uncertainty intervals are shown by indicator and region  
235 in Additional file 1: Table S7. All estimates were generated by taking 1 000 draws from the posterior distribution.  
236 For estimates at the 5 × 5-km grid-cell level, these draws were used directly to generate estimates and uncertainty.  
237 We generated 95% uncertainty intervals around the mean of our estimates by taking the 2.5% and 97.5% quantiles  
238 of each of the draws, at the grid-cell or administrative level. The proportion of children that received any ORS and  
239 only RHF estimates were adjusted by draw using the following formulas to ensure that they together summed to 1;  
240 the proportion of children that received no ORT in each location-year as follows:

$$241 \quad any\ ORS_{adjusted} = \frac{any\ ORS}{any\ ORS + only\ RHF} * (1 - no\ ORT)$$

$$242 \quad only\ RHF_{adjusted} = \frac{only\ RHF}{only\ RHF + any\ ORS} * (1 - no\ ORT)$$

243 To aggregate our results to second administrative-level units (e.g., districts, counties) for each draw, we fractionally  
244 assigned each grid cell to any intersecting unit by examining the starting area of the grid cell and the relative areas of  
245 the resulting geometric intersections, and took population-weighted averages of grid cells assigned to each unit. To  
246 aggregate to first administrative-level units (e.g., states, provinces), we computed population-weighted averages of  
247 nested second administrative units. To aggregate to country levels, we computed population-weighted averages of  
248 nested first administrative units.  
249

## 250 4.0 Model vetting and validation

### 251 4.1 Vetting stacker models and time trends

252 For each intermediate model and for final models, we created line plots of our estimates for each of the stacking  
253 models and the final INLA model including uncertainty overlaid on the input data. We created and reviewed these  
254 plots for each country and for each first administrative unit.  
255

### 256 4.2 In-sample validation

257 To explore the in-sample validity of our models, we plotted our predictions vs. the observed data by modelling  
258 regions and by year at the country-level, first administrative-level, and second administrative-level aggregations. We  
259 also calculated mean error (ME, or bias), root-mean-squared-error (RMSE, which summarizes total variance), and  
260 95% coverage of our predictive intervals (the proportion of observed in-sample data that fall within our predicted  
261 95% uncertainty intervals). The in-sample fit statistics are shown in Additional file 1: Figures S2–S4 and Additional  
262 file 1: Table S8 for any ORS, only RHF, and no ORT models.  
263

### 264 4.3 Out-of-sample validation

265 We examined the predictive validity of our modelling strategy using five-fold out-of-sample cross-validation. Folds  
266 were created by randomly assigning entire second administrative units, stratified by region, to one of five folds. For  
267 each modelling region, we ran the entire modelling process once per fold, in addition to the full in-sample runs  
268 described above, generating a complete set of out-of-sample predictions. Using these out-of-sample predictions, we  
269 then calculated mean error (ME, or bias), root-mean-squared-error (RMSE, which summarizes total variance), and  
270 95% coverage of our predictive intervals (the proportion of observed out-of-sample data that fall within our  
271 predicted 95% uncertainty intervals) aggregated to the spatial holdout level. Additional file 1: Figures S2–S4 show  
272 out-of-sample prediction vs. observed data. Additional file 1: Table S8 summarize out-of-sample statistics for any  
273 ORS, only RHF, and no ORT models.  
274  
275

## 276 5.0 Policy changes, interventions, and events

277 The sections below include various policy changes, interventions, and events that may have impacted access to  
278 healthcare and diarrhea treatment within each country. The events and data sources were collected according to the  
279 methods described in the “Analysis of Policy Changes” section within the manuscript methods. Key events in the  
280 analysis are bolded and underlined, and events are organized within the time periods that were used for analysis.

281

282

### 283 5.1 Sierra Leone

#### 284 2000 to 2009

- 285 • Sierra Leone Civil War from 1991 – 2002 (17).
- 286 • Before the war, ORS was promoted by Blue Flag Volunteers. During the war, ORS was given in displaced  
287 persons camps. After the conflict, ORS continued to be supported and promoted at all levels, from  
288 community health workers to the Ministry of Health and Sanitation (18).
- 289 • In 2005, began deploying community case management (CCM) through community health volunteers in  
290 rural areas to increase coverage of treatment for malaria, pneumonia, and diarrhea (19).

#### 291 2009 to 2013

- 292 • **Key event:** In April 2010, the government of Sierra Leone abolished healthcare costs—including drug and  
293 treatment costs—for pregnant women, new mothers and children under five (20,21). Although there were  
294 various challenges to full implementation, including inadequate infrastructure and inefficient drug  
295 distribution systems (21), the program resulted in increased healthcare utilization (19,21,22).
- 296 • In 2010, UNICEF engaged with partners to introduce CCM for diarrhea, malaria, and pneumonia in  
297 districts with especially poor health indicators (23).
- 298 • In June 2012, the Ministry of Health and Sanitation released a policy for community healthcare workers  
299 (CHW) in an effort to strengthen health care system. It described a framework for training, although no  
300 specific modules were provided (24).
- 301 • In November 2012, UNICEF and World Hope International entered into an agreement to launch a CHW  
302 program in Bombali District (which includes Makeni, Sierra Leone’s fourth largest city). The aim was  
303 improving maternal health outcomes through intensive case management of pregnant women. The  
304 agreement covered cost of CHW salaries until the completion of the grant in June 2016 (25).
- 305 • In 2012, there was a nation-wide cholera epidemic during the rainy season, Sierra Leone’s largest recorded  
306 cholera outbreak, with a total of 245 293 cases (26).

#### 307 2013 to 2017

- 308 • **Key event:** Ebola outbreak from 2014 to 2016 (27). Ebola cases were first reported in the spring of 2014.  
309 Incidence rose sharply from August to December 2014, exceeding the capacity of Ebola holding and  
310 treatment centers (27). In response, additional treatment, holding, and community care centers were  
311 opened. This coincided with efforts to increase community engagement and prevent viral transmission,  
312 particularly during funerals (27). There were over 8000 confirmed cases of Ebola by January 2015, with the  
313 Western Areas seeing the most cases, followed by Port Loko, Bombali, Kailahun, Kenema, Tonkolili, and  
314 Bo (27). A study conducted in Moyamba district (Southern Region) and Koinadugu district (Northern  
315 Region) found that the outbreak was accompanied by disruptions in relationships between health systems  
316 and communities, which led to decreases in health facility utilization, including decreases in both paediatric  
317 and maternal admissions (28).

318

## 319 5.2 Mali

### 320 2001 to 2004

- 321 • **Key event:** From 2003-2004 pilot interventions were conducted in southern Mali that introduced zinc  
322 therapy in addition to ORS treatment for diarrhea in two health zones of Bougouni (29,30). Zinc was  
323 provided through existing community health centers and drug kits and managed by community health  
324 workers. The cost of zinc to the patients was 100 CFA Francs (~0.19 US\$) for the full package of 14 zinc  
325 tablets, and it was promoted through village meetings and individual counseling at health centers. In  
326 addition, health staff were trained in diarrhea case management with zinc and ORS, as well as in diarrhea  
327 prevention. Household surveys were conducted before and after introduction. Preliminary evidence  
328 suggested that zinc introduction did not affect ORS coverage and that there were various barriers to scale-  
329 up, including financial access, management of concurrent diarrhea and fever symptoms, and use of  
330 unauthorized drug vendors (29,30).
- 331 • **Key event:** From 2003-2004 the Ministry of Health and the Partners in Health Reform project partnered to  
332 do a case-control study of mutual health organizations in two rural districts of Bla and two urban districts  
333 of Sikasso (31). Mutual health organizations are community-based health insurance services where  
334 membership is voluntary. Their aim is to increase healthcare access by reducing out-of-pocket costs of care  
335 for individual households. The study found that cases were three times as likely as controls to take children  
336 to healthcare facilities and/or treat them with ORS at home (31).

### 337 2004 to 2011

- 339 • Community-Led Total Sanitation was introduced in 2009 (32).
- 340 • In 2011-2015, the National Department of Health set “The Strategic Plan for the promotion of hygiene  
341 practices for big impact within the framework for the reduction of diarrhoeal diseases ” (32).
- 342 • The Maternal and Child Health Integrated Program rolled out a mentorship program from October 1, 2010  
343 – June 30, 2014 (33). In this program, trained supervisors coached staff on applying the Integrative  
344 Community Care Guidelines for treating diarrhea. This covered 25% of regions, included 7 districts, and a  
345 total of 166 facilities (33).

### 346 2011 to 2018

- 348 • **Key event:** From January to April 2012, Mali underwent its fourth Tuareg uprising since it gained  
349 independence from France in 1960 (34). The rebellion was launch on January 17<sup>th</sup>, three years after the  
350 previous north-south peace agreement, with an attack on a Malian military garrison in the north-eastern  
351 town of Menaka (34). On March 22, there was an improvised military coup in the south, causing the  
352 situation to deteriorate further (34). By the end of April, all major northern cities were controlled by the  
353 rebellion. From April to May the rebellion underwent an “Islamist take-over”, which led to the  
354 establishment of a new order and creation of an Islamic police force in the north (34). The northern region  
355 and parts of Mopti in central Mali saw massive displacement and violence during the war (34) and continue  
356 to experience frequent conflict.
- 357 • In 2019, the government of Mali announced wide-scale health reforms that would include free health  
358 services for pregnant women and children under the age of 5, although these reforms will not be fully  
359 effective before 2022 (35).

360



361 **5.3 Senegal**

362 2000 to 2006

363 Prior to 2006 several USAID “technical assistance” programs were implemented that promoted ORS and RHF  
364 treatments (18,36,37):

- 365 • PRITECH introduced ORS in Senegal in 1985. ORS was donated by USAID and UNICEF, and was  
366 distributed free of charge. PRITECH additionally promoted the use of RHF for diarrhea (18,36,37).
- 367 • BASICS followed PRITECH in 1994 and continued to promote both ORS and RHF, and focused  
368 on technical assistance in Thiès, Louga, Kaolack, and Ziguinchor regions (18,36,37).
- 369 • ORS and RHF were introduced in community “health huts” starting in the 1990s. However, ORS was not  
370 widely available due to weak distribution systems that caused frequent shortages (18,36,37).
- 371 • The Child Survival Program was implemented from 1998 to 2002. It increased knowledge of ORS  
372 preparation, but did not increase ORS use or availability (18,36,37).
- 373 • Integrated Community Care Management (iCCM) started in 2003 in collaboration with the Ministry of  
374 Health, Public Hygiene and Prevention. This covered the whole country, but was also accompanied  
375 by increases in medicine prices in order to cover supply costs (38).

376  
377 2006 to 2012

- 378 • Fatick Partnership from 2007 to 2009 continued the work of BASICS in Fatick Region (18,36,37).
- 379 • The Community Health Program was implemented from 2006 to 2011 by six NGOs (ChildFund, Africare,  
380 Plan, World Vision, Catholic Relief Services and Counterpart International) to strengthen access to primary  
381 health care services in previously underserved rural communities (18,36,37).
- 382 • **Key event:** In 2008, The Ministry of Health, Public Hygiene and Prevention began promoting the new  
383 WHO and UNICEF guidelines for treating diarrhea with low-osmolality ORS and zinc together (39).  
384 Following this policy change, an ORS-zinc pilot program was launched in Thiès, Fatick and Kolda, and the  
385 iCCM guidelines for diarrhea were revised (39). In addition, in 2010, UNICEF provided an annual stock of  
386 zinc at the regional level, and capacity building began to implement the new iCCM guidelines (39). There  
387 was a lot of reliance on external implementation of this program (18,36,37).
- 388 • Zinc was introduced in community “health huts” in 2009. There were more than 1600 of these in Senegal  
389 by 2010. However, they still charged full price for ORS and zinc and few workers knew how to look for  
390 signs of dehydration (18,36,37).

391  
392 2012 to 2017

- 393 • **Key event:** In 2012, the Ministry of Health, Public Hygiene and Prevention partnered with the Canada-  
394 based Zinc Alliance for Child Health (ZACH) to launch a nation-wide ORS and zinc scale-up campaign,  
395 which was rolled out over 3 years (39,40). The project aimed to use behavior change communication to  
396 strengthen knowledge of diarrhea and improve awareness of the importance of treating childhood diarrhea  
397 with ORS and zinc (39,40). It aimed to train community actors, mothers and guardians, and health workers.  
398 In addition, it aimed to work at all levels of government to improve availability of supplies and treatment in  
399 ways that are affordable for communities, families, and the health system (39,40). This included making  
400 ORS and zinc available in all public and private communities health facilities, as well as strengthening  
401 organizational management systems (39). Finally, it aimed to establish systems for evaluating progress and  
402 ensuring sustainability of the program (39).
- 403 • In 2013, the government committed to pursuing universal health coverage, but this will not be fully  
404 implemented until 2022 (41).

405

|     |                                                                                                             |    |
|-----|-------------------------------------------------------------------------------------------------------------|----|
| 406 | <b>6.0 Additional file 1: Figures</b>                                                                       |    |
| 407 | Additional file 1: Figure S1. Geospatial modelling flowchart.....                                           | 11 |
| 408 | Additional file 1: Figure S2. In-sample and out-of-sample validation plots for any ORS.....                 | 12 |
| 409 | Additional file 1: Figure S3. In-sample and out-of-sample validation plots for only RHF. ....               | 13 |
| 410 | Additional file 1: Figure S4. In-sample and out-of-sample validation plots for no ORT. ....                 | 14 |
| 411 | Additional file 1: Figure S5. Oral rehydration therapy coverage by district/cercle/department and year..... | 15 |
| 412 | Additional file 1: Figure S6. Numbers of untreated children by district/cercle/department and year. ....    | 18 |
| 413 |                                                                                                             |    |

414 **Additional file 1: Figure S1. Geospatial modelling flowchart**

415 The geospatial modelling process consists of four sections. First (in blue), we compile all available survey data that can be referenced to a coordinate/point (e.g.,  
 416 survey cluster) or small polygon unit and calculate any ORS, only RHF, and no ORT coverage at the respective level (sections 1.0 and 2.0). Data matched to  
 417 polygons are resampled into pseudo-points using a k-means clustering algorithm (section 2.3). Covariates are subsequently merged to the points and pseudo-  
 418 points via a spatial join (section 2.4). Second (green), we use the point data and their associated covariates and a stacked generalisation ensemble model (section  
 419 3.2). The child models—boosted regression trees, generalised additive models, and elastic net regression—are fit using a five-fold cross validation process  
 420 (section 3.3). The cross-validated predictions from each model then serve as the covariate values for the main/parent model (Spatio-temporal GPR model)  
 421 (section 3.3). The predictions from when the child models are fit on all the data (rather than 4/5<sup>ths</sup> implied by the cross-validation) are then used to create  
 422 posterior predictions of any ORS, only RHF, and no ORT coverage in a 5 × 5-km grid for the years 2000–2017 or 2001–2018 (section 3.3). Finally (orange), we  
 423 aggregate our estimates to second administrative units (section 3.6).  
 424

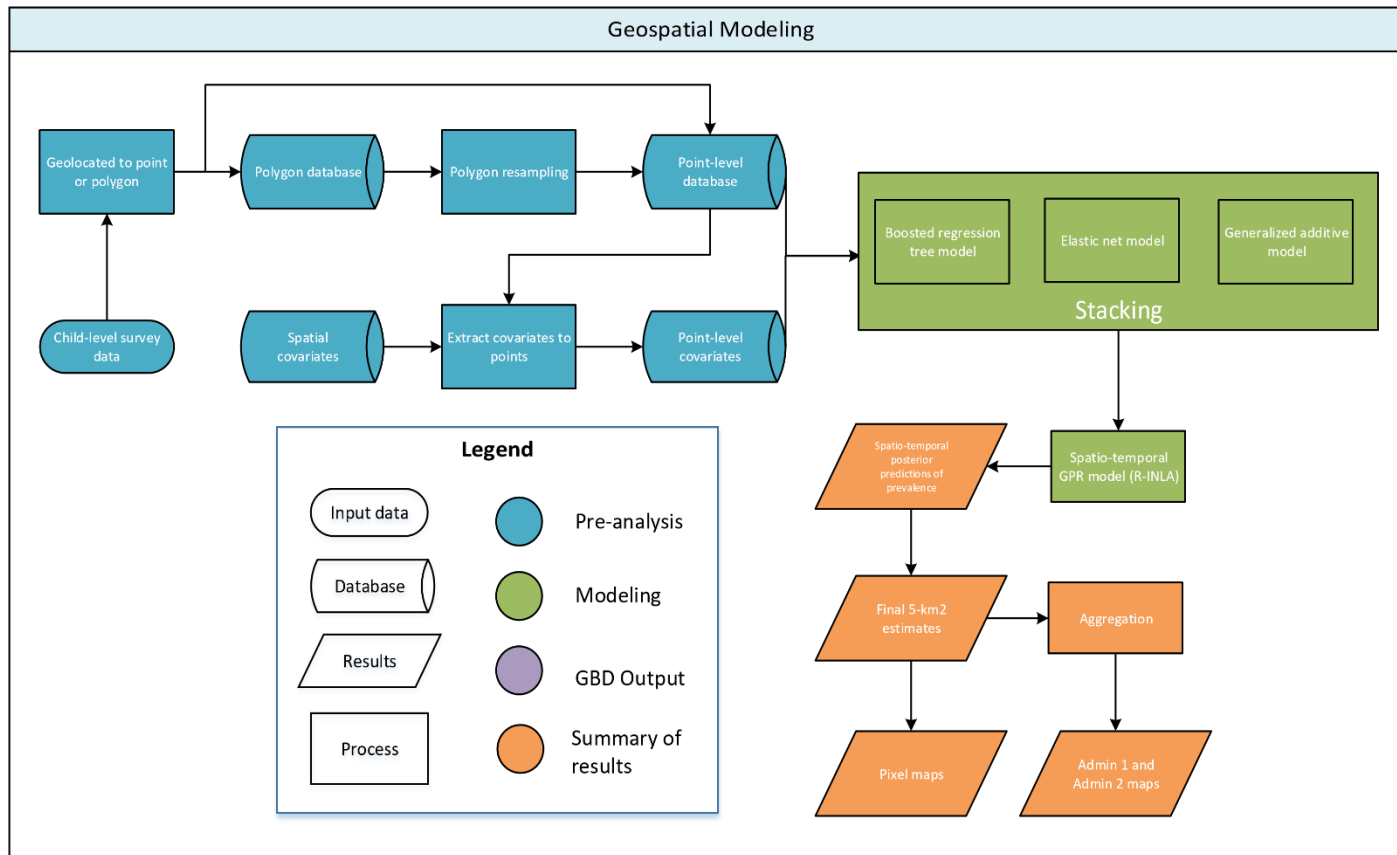

425

426 **Additional file 1: Figure S2. In-sample and out-of-sample validation plots for any ORS.**

427 Each plot shows the survey data on the x-axis and mean posterior predictions of coverage y-axis. The size of each  
428 dot is proportional to sample size in the underlying data. Estimates for in-sample (a) and out-of-sample (b)  
429 are shown aggregated to second administrative levels for Mali (MLI), Senegal (SEN), and Sierra Leone (SLE). For  
430 corresponding in-sample and out-of-sample fit statistics see Additional file 1: Table S8.  
431

432 a)

433 In-sample validation plot for any ORS by second administrative unit

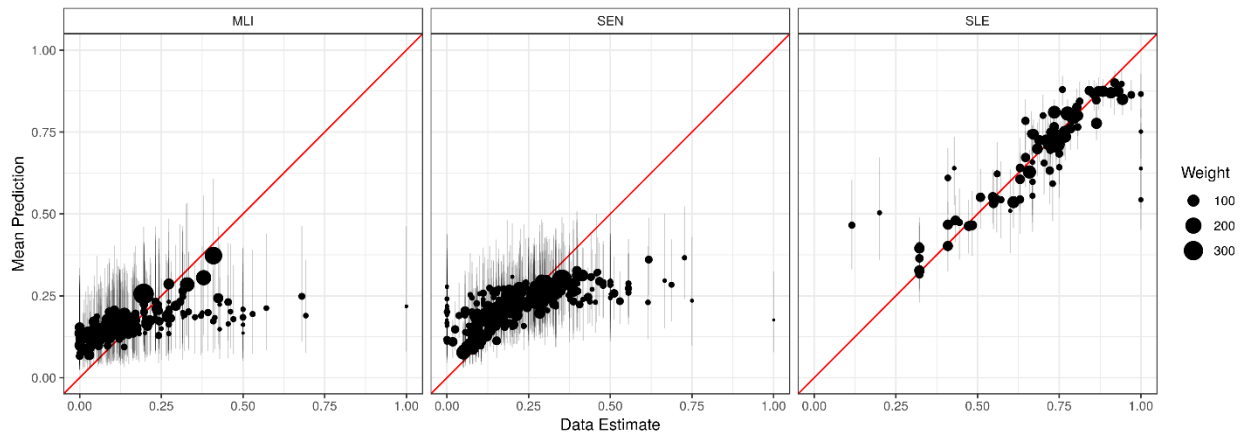

434  
435 b)

436 Out-of-sample validation plot for any ORS by second administrative unit

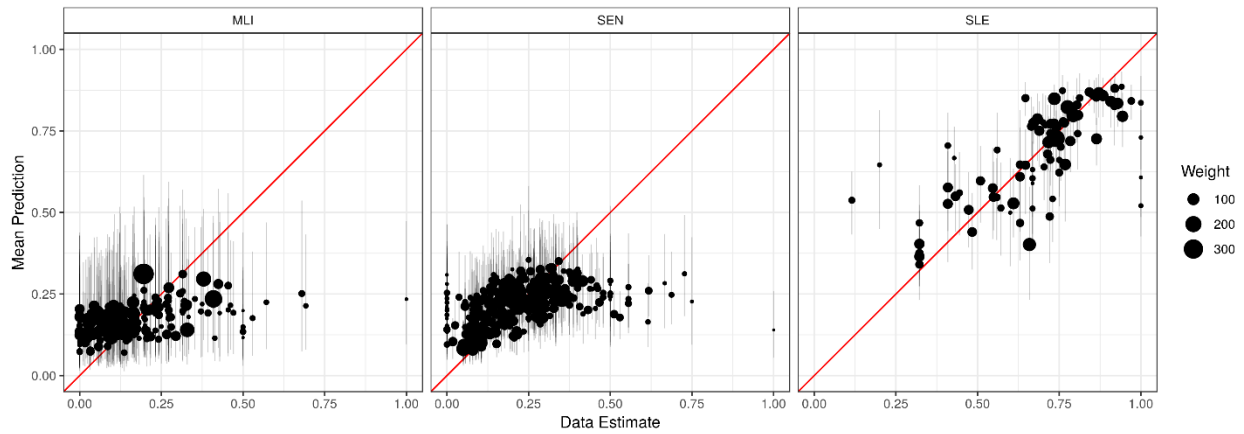

437  
438  
439  
440

441 **Additional file 1: Figure S3. In-sample and out-of-sample validation plots for only RHF.**

442 Each plot shows the survey data on the x-axis and mean posterior predictions of coverage y-axis. The size of each  
443 dot is proportional to sample size in the underlying data. Estimates for in-sample (a) and out-of-sample (b)  
444 models are shown aggregated to second administrative levels for Mali (MLI), Senegal (SEN), and Sierra Leone (SLE). For  
445 corresponding in-sample and out-of-sample fit statistics see Additional file 1: Table S8.  
446  
447

a)

448 In-sample validation plot for only RHF by second administrative unit

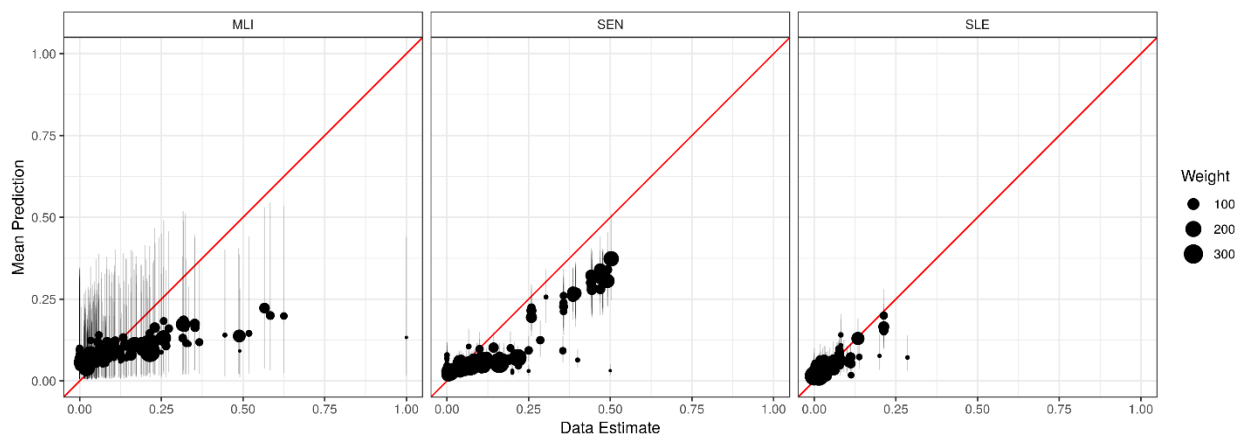

449  
450

b)

451 Out-of-sample validation plot for only RHF by second administrative unit

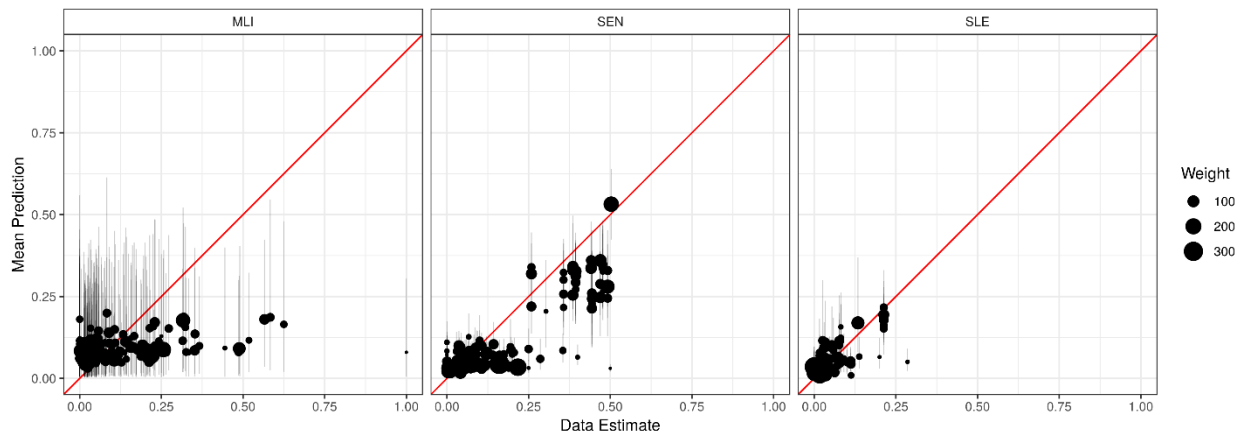

452  
453  
454

455 **Additional file 1: Figure S4. In-sample and out-of-sample validation plots for no ORT.**

456 Each plot shows the survey data on the x-axis and mean posterior predictions of coverage y-axis. The size of each  
457 dot is proportional to sample size in the underlying data. Estimates for in-sample (a) and out-of-sample (b)  
458 are shown aggregated to second administrative levels for Mali (MLI), Senegal (SEN), and Sierra Leone (SLE). For  
459 corresponding in-sample and out-of-sample fit statistics see Additional file 1: Table S8.

460  
461 a)

462 In-sample validation plot for no ORT by second administrative unit

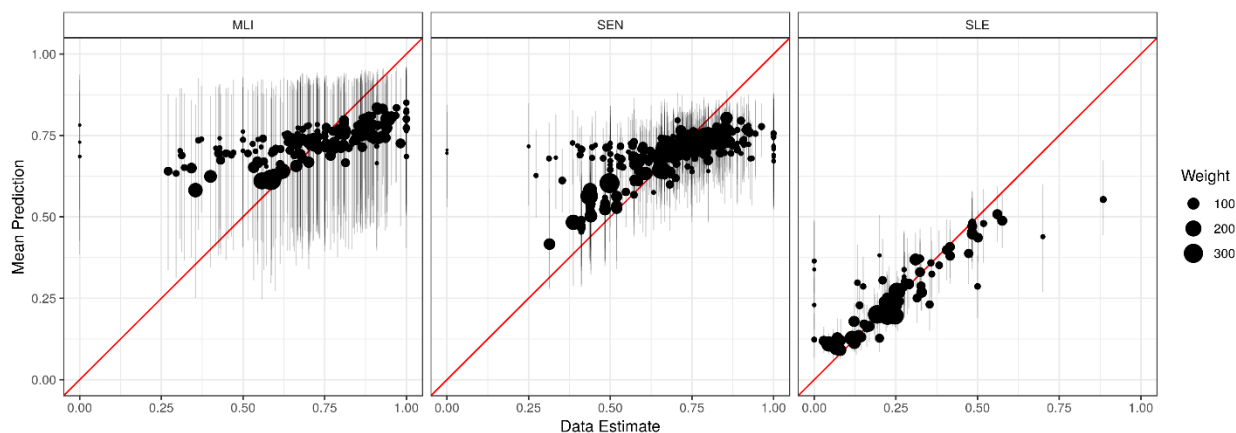

463  
464 b)

465 Out-of-sample validation plot for no ORT by second administrative unit

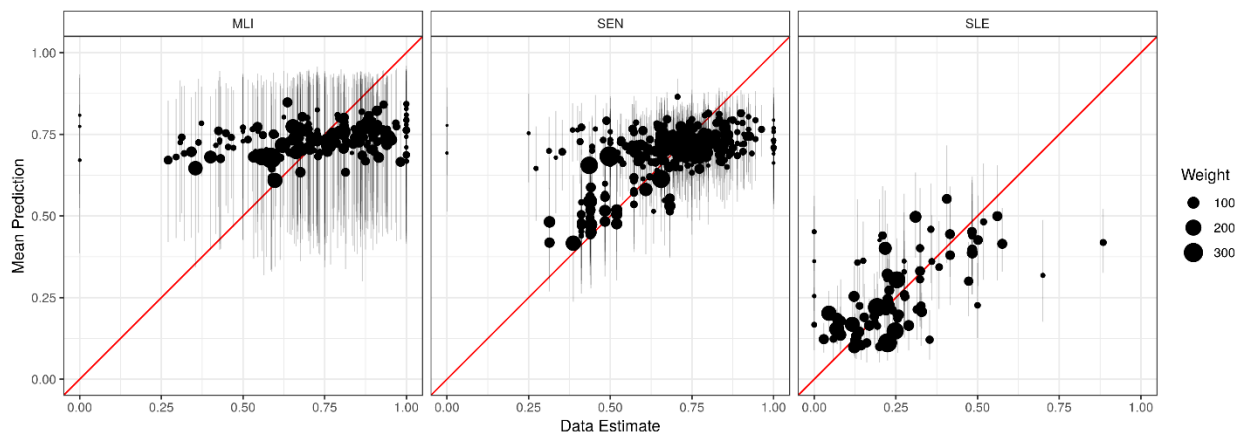

466  
467

468 **Additional file 1: Figure S5. Oral rehydration therapy coverage by district/cercle/department and**  
469 **year.**

470 Mean oral rehydration therapy coverage estimates for a) Sierra Leone, b) Mali, and c) Senegal.

471 **a) Sierra Leone**

472 Coverage estimates by district for Any ORS, Only RHF, and No ORT in 2000, 2009, 2013, and 2017.

473 Estimates correspond to results in Figure 2a,b and Additional file 1: Table S10a.

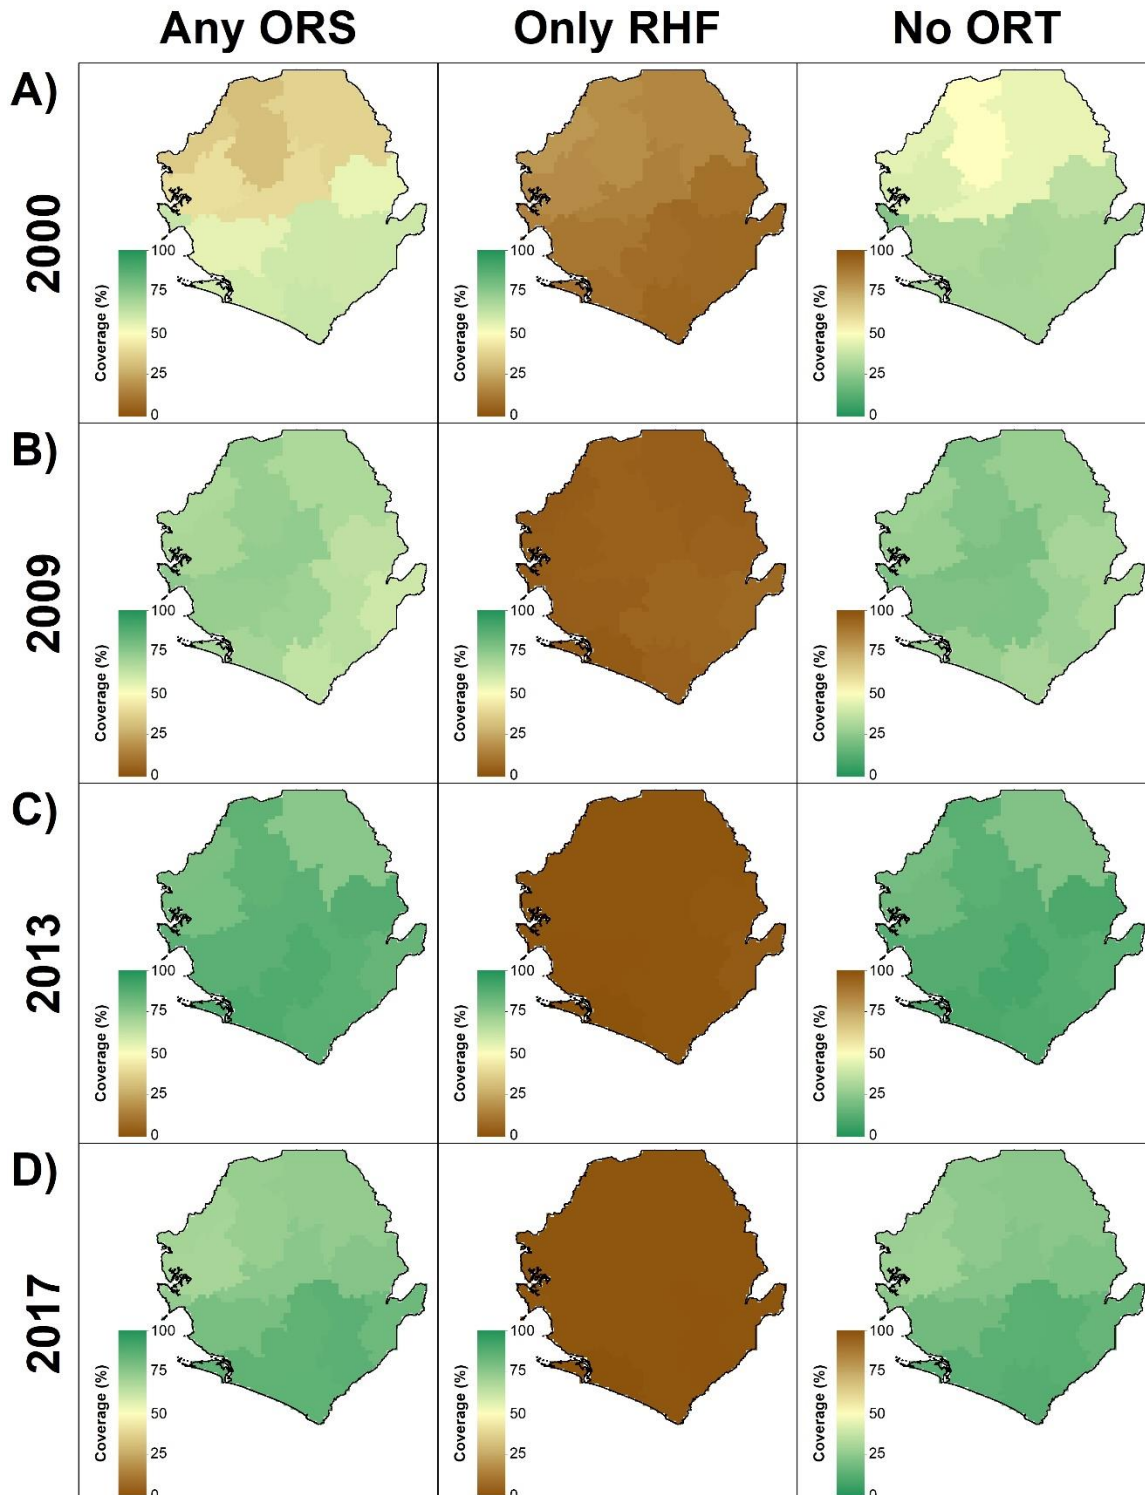

474

475  
476  
477  
478

a) Mali  
Coverage estimates by cercle for Any ORS, Only RHF, and No ORT in 2001, 2004, 2011, and 2018.  
Estimates correspond to results in Figure 3a,b and Additional file 1: Table S10b.

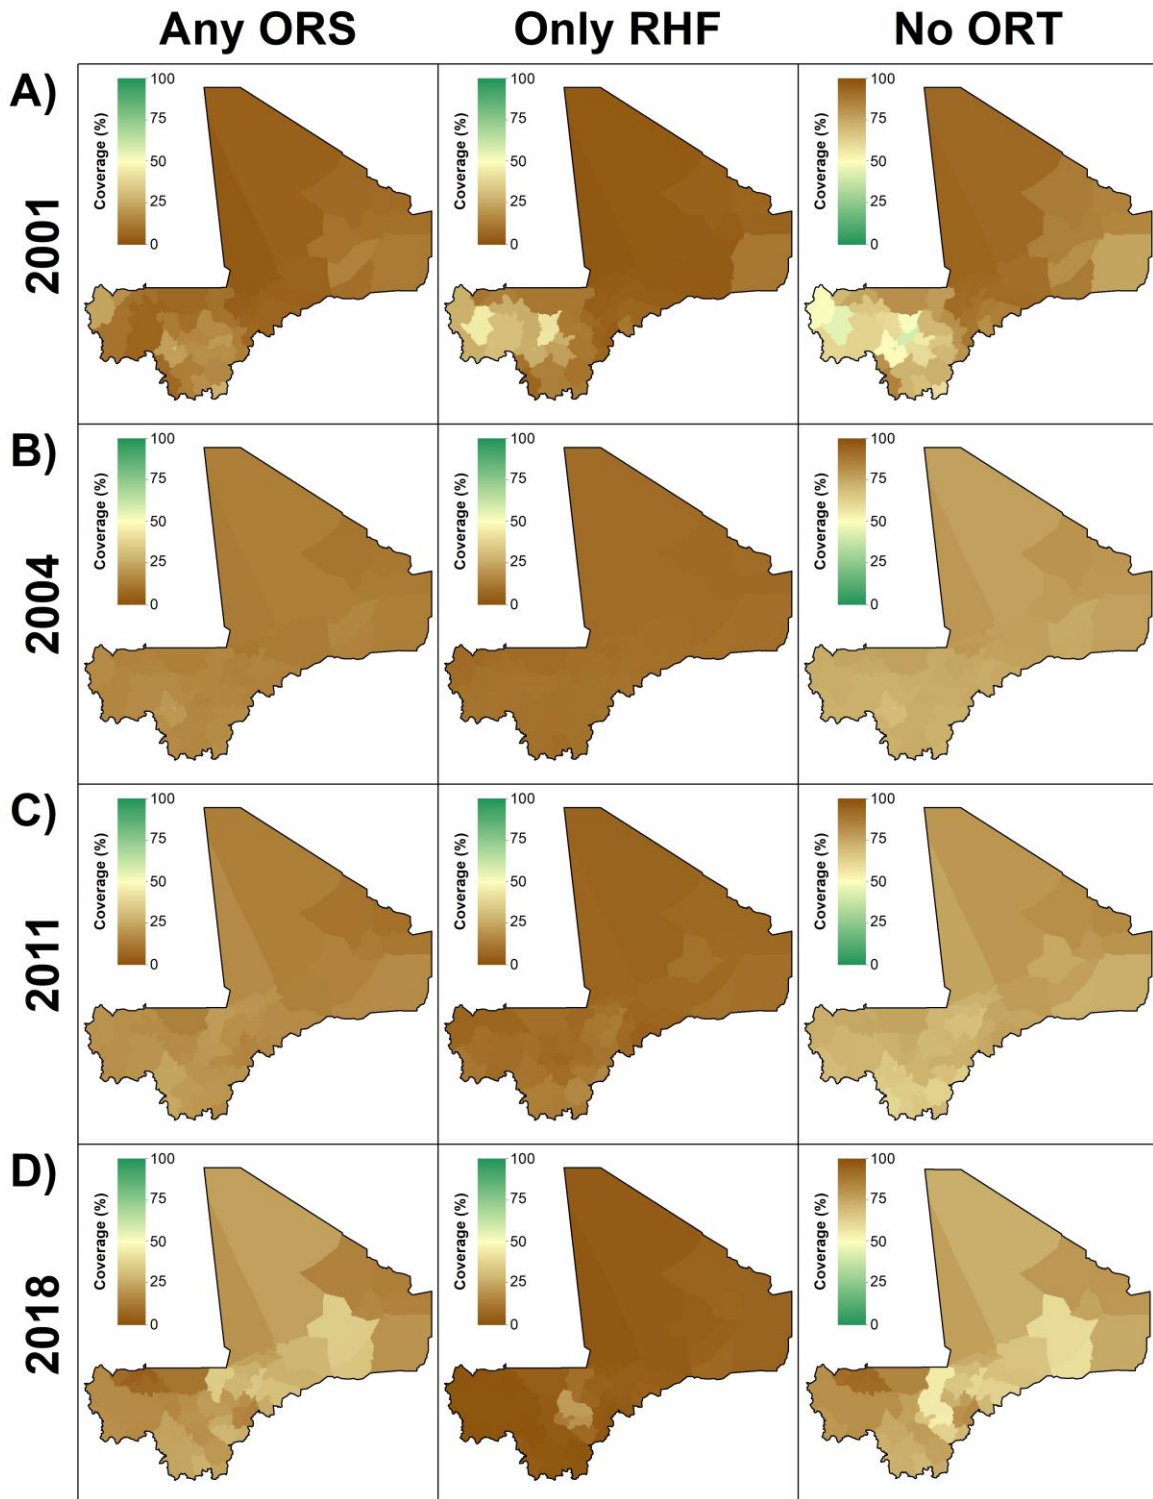

479  
480



481 a) Senegal  
482 Coverage estimates by department for Any ORS, Only RHF, and No ORT in 2000, 2006, 2012, and 2017.  
483 Estimates correspond to results in Figure 4a,b and Additional file 1: Table S10c.  
484

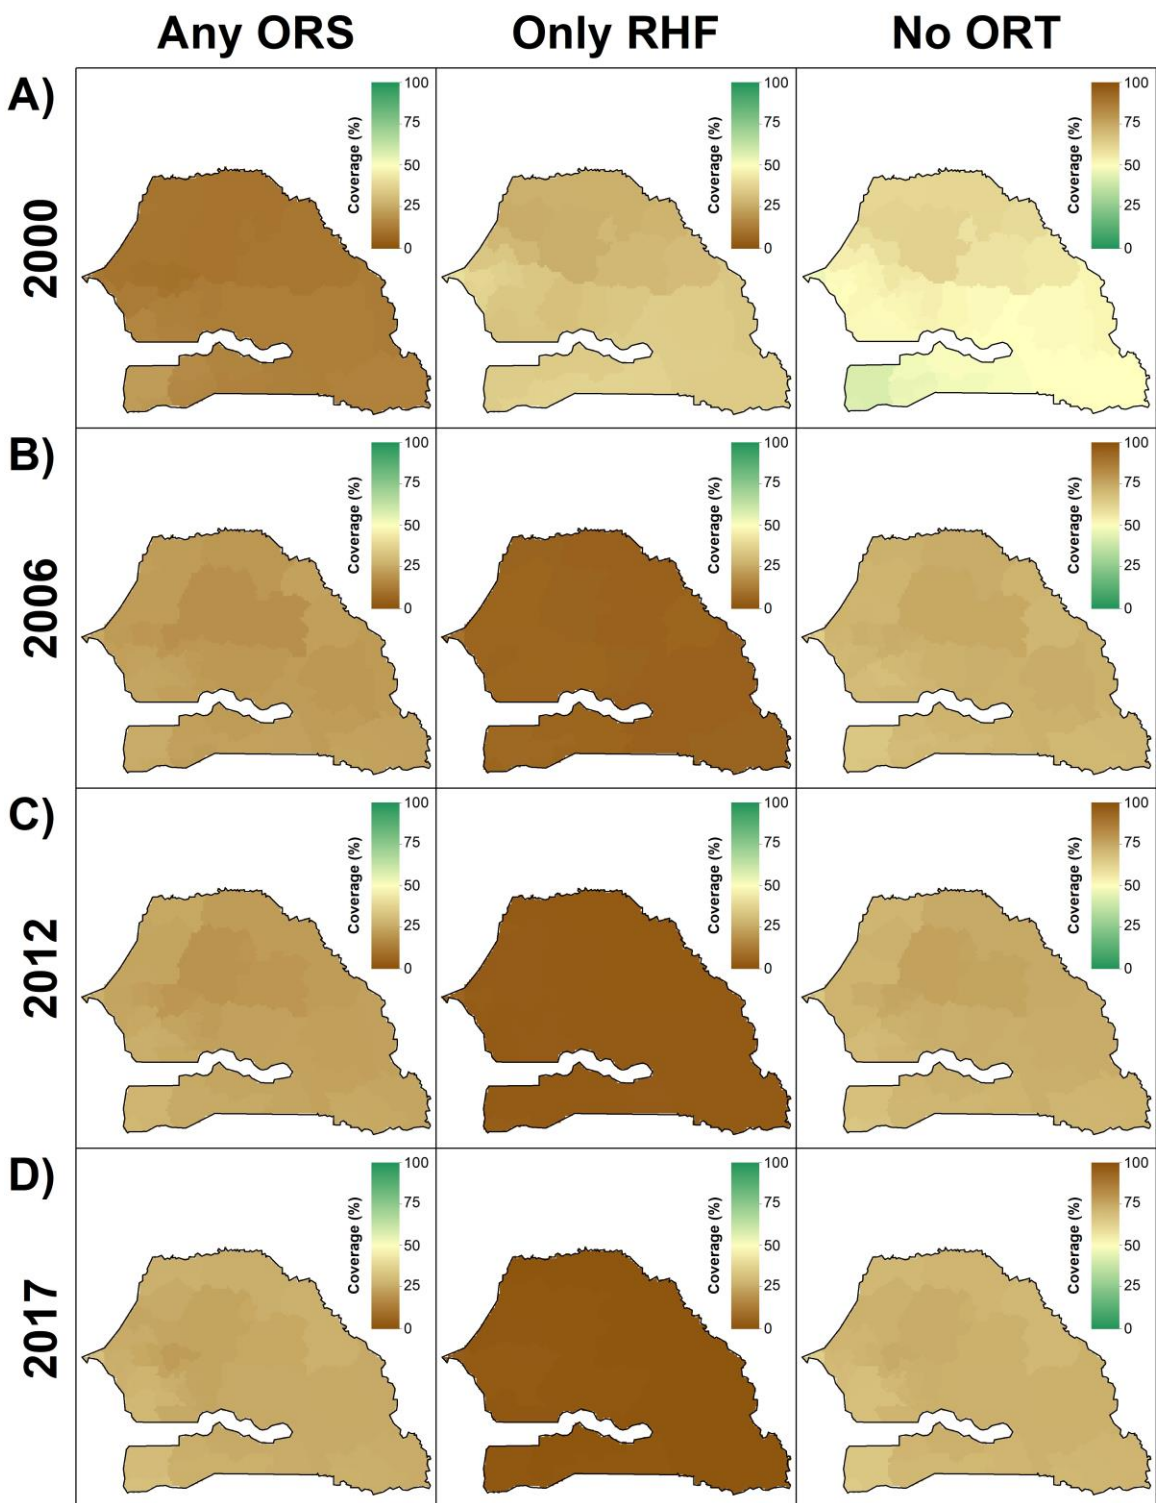

485  
486  
487

488 **Additional file 1: Figure S6. Numbers of untreated children by district/cercle/department and year.**  
489 Mean number of children with diarrhea untreated with ORT for a) Sierra Leone, b) Mali, and c) Senegal.

490 **a) Sierra Leone**

491 Number of children with diarrhea untreated by district for Any ORS, Only RHF, and Any ORT (either ORS  
492 or RHF) in 2000, 2009, 2013, and 2017. Mean numbers of children with diarrhea were calculated using  
493 previous estimates (42).

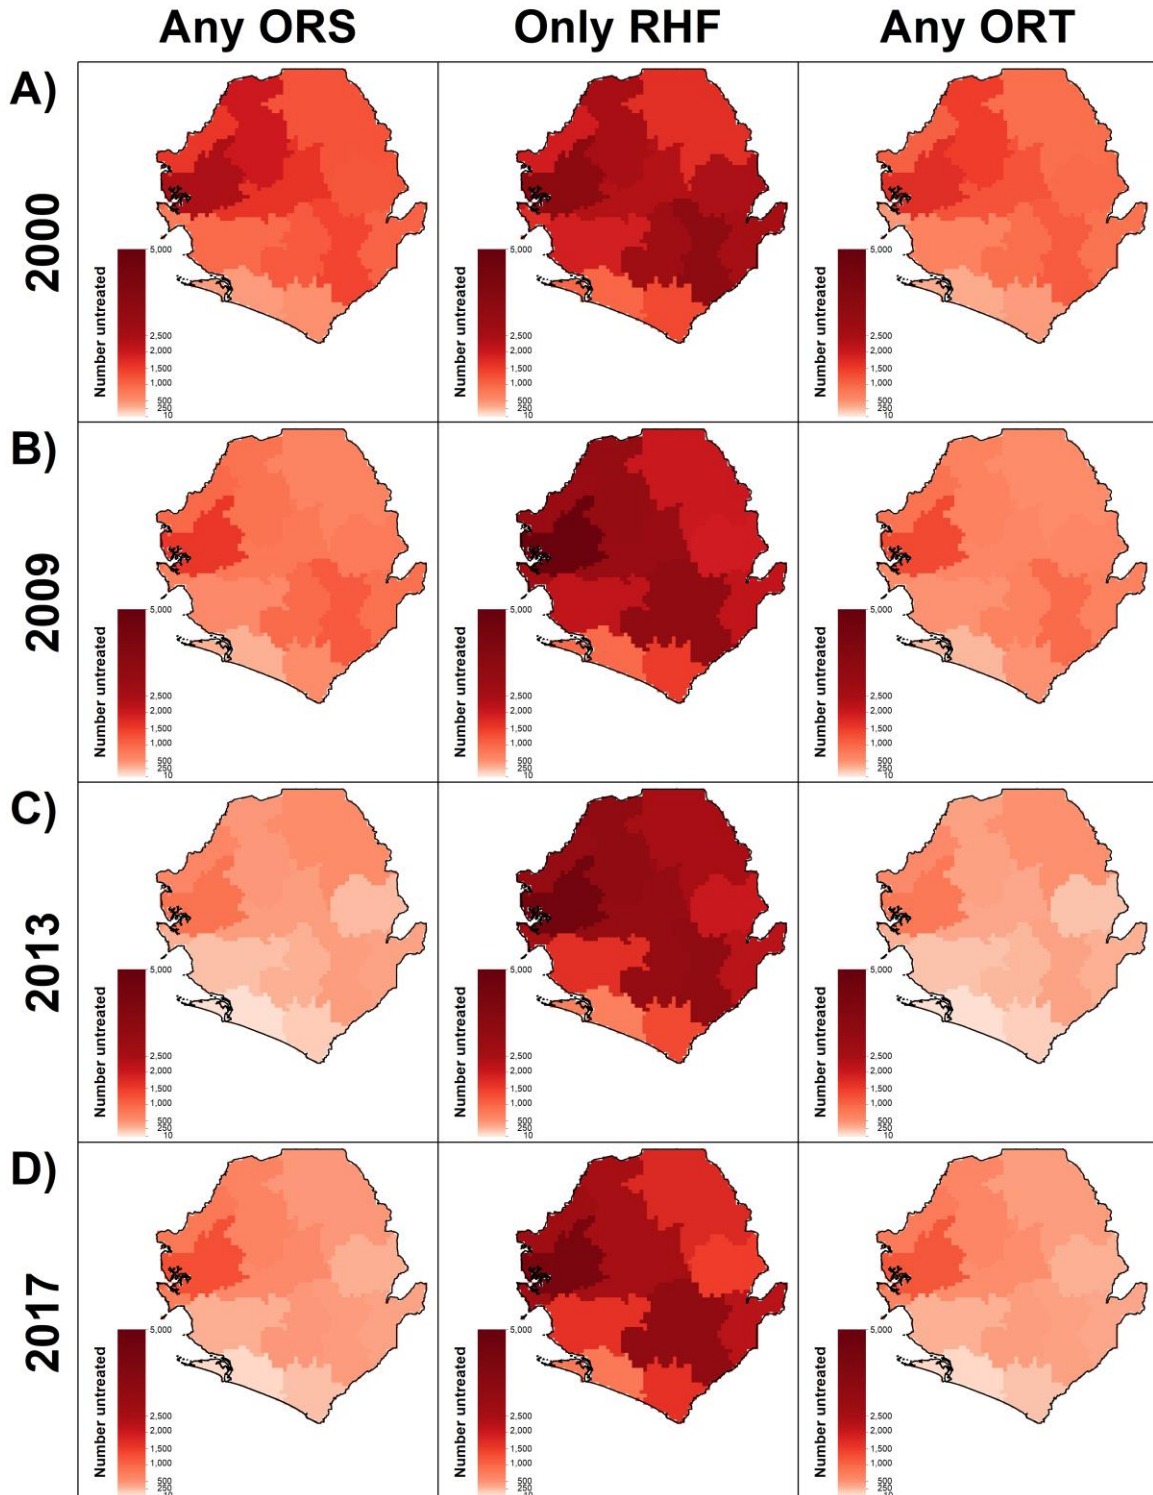

494

495 a) Mali  
496 Number of children with diarrhea untreated by cercle for Any ORS, Only RHF, and Any ORT (either ORS  
497 or RHF) in 2001, 2004, 2011, and 2018. Mean numbers of children with diarrhea were calculated using  
498 previous estimates (42). For simplicity, 2018 numbers with diarrhea in Mali were assumed to be the same as  
499 2017 numbers.  
500

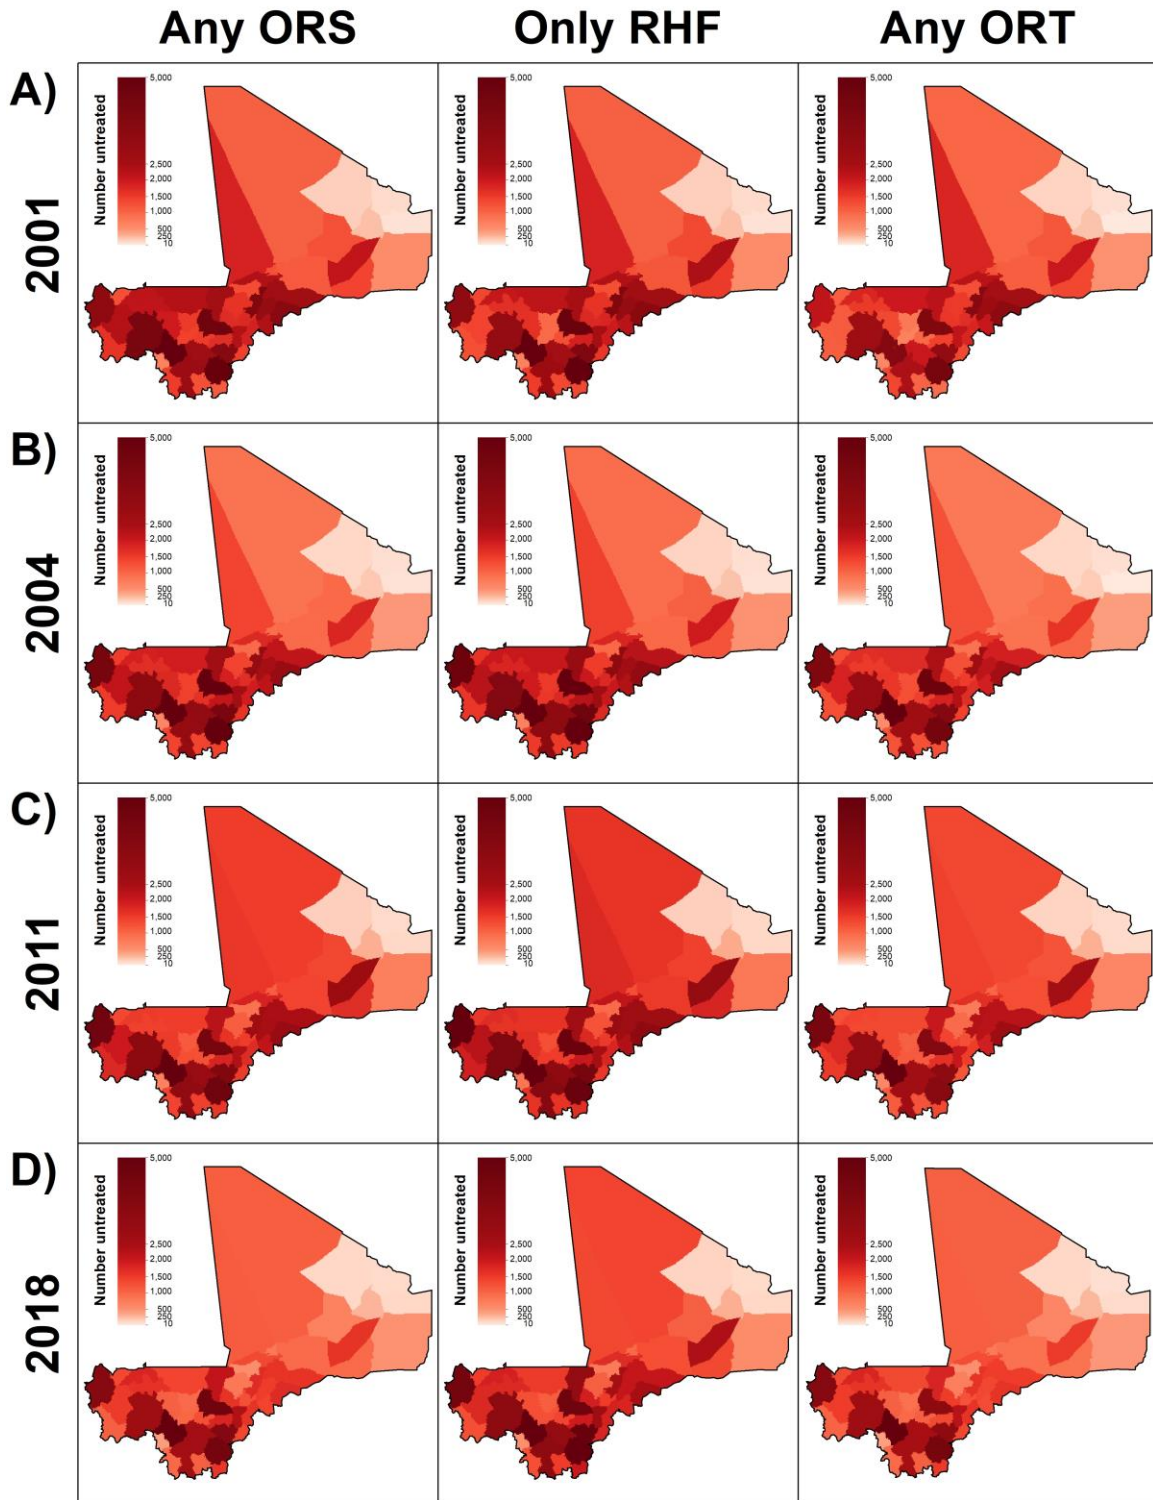

501



502 **a) Senegal**  
503 Number of children with diarrhea untreated by department for Any ORS, Only RHF, and Any ORT (either  
504 ORS or RHF) in 2000, 2006, 2012, and 2017. Mean numbers of children with diarrhea were calculated using  
505 previous estimates (42).  
506

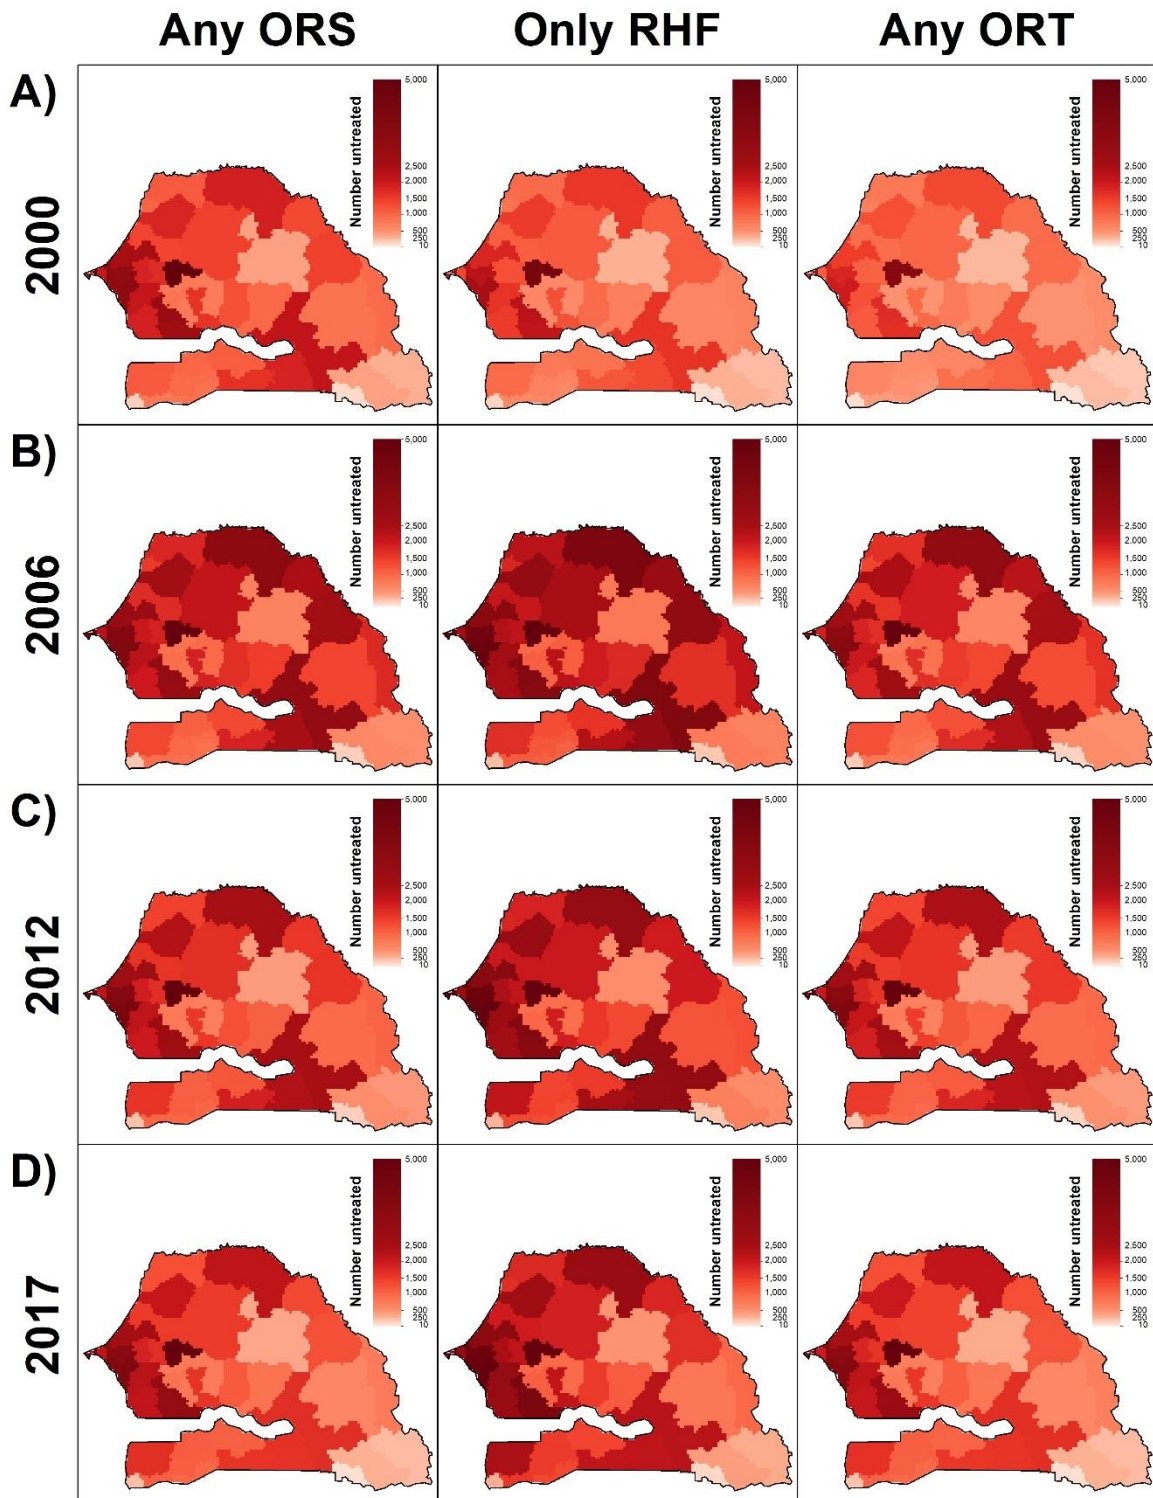

507  
508

|     |                                                                                                                        |    |
|-----|------------------------------------------------------------------------------------------------------------------------|----|
| 509 | <b>7.0 Additional file 1: Tables</b>                                                                                   |    |
| 510 | Additional file 1: Table S1. Compliance for the Guidelines for Accurate and transparent Health Estimates Reporting     |    |
| 511 | .....                                                                                                                  | 22 |
| 512 | Additional file 1: Table S2. Input data sources.....                                                                   | 23 |
| 513 | Additional file 1: Table S3. Only recommended home fluid (only RHF) definition adjustments .....                       | 24 |
| 514 | Additional file 1: Table S4. No oral rehydration therapy (No ORT) definition adjustments .....                         | 24 |
| 515 | Additional file 1: Table S5. Covariates used in mapping .....                                                          | 25 |
| 516 | Additional file 1: Table S6. Covariates used in ensemble covariate modelling via stacked generalisation, stratified by |    |
| 517 | country.....                                                                                                           | 27 |
| 518 | Additional file 1: Table S7. Fitted parameters.....                                                                    | 28 |
| 519 | Additional file 1: Table S8. In-sample and out-of-sample fit statistics for any ORS, only RHF, and no ORT .....        | 31 |
| 520 | Additional file 1: Table S9. Oral rehydration therapy coverage and numbers untreated by country and year. ....         | 32 |
| 521 | Additional file 1: Table S10. Oral rehydration therapy coverage by district/cercle/department and year. ....           | 35 |
| 522 | Additional file 1: Table S11. Changes in oral rehydration therapies in three time periods. ....                        | 48 |
| 523 |                                                                                                                        |    |
| 524 |                                                                                                                        |    |
| 525 |                                                                                                                        |    |
| 526 |                                                                                                                        |    |
| 527 |                                                                                                                        |    |
| 528 |                                                                                                                        |    |
| 529 |                                                                                                                        |    |
| 530 |                                                                                                                        |    |
| 531 |                                                                                                                        |    |
| 532 |                                                                                                                        |    |
| 533 |                                                                                                                        |    |
| 534 |                                                                                                                        |    |

535 **Additional file 1: Table S1. Compliance for the Guidelines for Accurate and transparent Health**  
 536 **Estimates Reporting**

537

| Item #                                                                                                | Checklist item                                                                                                                                                                                                                                                                                                                                                                            | Reported on page #                                                                                                                                                   |
|-------------------------------------------------------------------------------------------------------|-------------------------------------------------------------------------------------------------------------------------------------------------------------------------------------------------------------------------------------------------------------------------------------------------------------------------------------------------------------------------------------------|----------------------------------------------------------------------------------------------------------------------------------------------------------------------|
| <b>Objectives and funding</b>                                                                         |                                                                                                                                                                                                                                                                                                                                                                                           |                                                                                                                                                                      |
| 1                                                                                                     | Define the indicator(s), populations (including age, sex, and geographic entities), and time period(s) for which estimates were made.                                                                                                                                                                                                                                                     | Manuscript: Methods<br>Additional file 1: Sections 1.0, 2.0                                                                                                          |
| 2                                                                                                     | List the funding sources for the work.                                                                                                                                                                                                                                                                                                                                                    | Manuscript: Methods                                                                                                                                                  |
| <b>Data Inputs</b>                                                                                    |                                                                                                                                                                                                                                                                                                                                                                                           |                                                                                                                                                                      |
| <i>For all data inputs from multiple sources that are synthesised as part of the study:</i>           |                                                                                                                                                                                                                                                                                                                                                                                           |                                                                                                                                                                      |
| 3                                                                                                     | Describe how the data were identified and how the data were accessed.                                                                                                                                                                                                                                                                                                                     | Manuscript: Methods<br>Additional file 1: Section 2.0                                                                                                                |
| 4                                                                                                     | Specify the inclusion and exclusion criteria. Identify all ad-hoc exclusions.                                                                                                                                                                                                                                                                                                             | Manuscript: Methods<br>Additional file 1: Sections 1.0 and 2.0                                                                                                       |
| 5                                                                                                     | Provide information on all included data sources and their main characteristics. For each data source used, report reference information or contact name/institution, population represented, data collection method, year(s) of data collection, sex and age range, diagnostic criteria or measurement method, and sample size, as relevant.                                             | Manuscript: Methods<br>Additional file 1: Sections 1.0 and 2.0<br><br>Global Health Data Exchange ( <i>link available upon publication</i> )                         |
| 6                                                                                                     | Identify and describe any categories of input data that have potentially important biases (e.g., based on characteristics listed in item 5).                                                                                                                                                                                                                                              | Additional file 1: Section 2.0                                                                                                                                       |
| <i>For data inputs that contribute to the analysis but were not synthesised as part of the study:</i> |                                                                                                                                                                                                                                                                                                                                                                                           |                                                                                                                                                                      |
| 7                                                                                                     | Describe and give sources for any other data inputs.                                                                                                                                                                                                                                                                                                                                      | Manuscript: Methods<br>Additional file 1: Sections 2.0, 3.0                                                                                                          |
| 8                                                                                                     | Provide all data inputs in a file format from which data can be efficiently extracted (e.g., a spreadsheet rather than a PDF), including all relevant meta-data listed in item 5. For any data inputs that cannot be shared because of ethical or legal reasons, such as third-party ownership, provide a contact name or the name of the institution that retains the right to the data. | Global Health Data Exchange ( <i>link available upon publication</i> )                                                                                               |
| 9                                                                                                     | Provide a conceptual overview of the data analysis method. A diagram may be helpful.                                                                                                                                                                                                                                                                                                      | Manuscript: Methods<br>Additional file 1: Section 3.0<br>Additional file 1: Figure S1                                                                                |
| 10                                                                                                    | Provide a detailed description of all steps of the analysis, including mathematical formulae. This description should cover, as relevant, data cleaning, data pre-processing, data adjustments and weighting of data sources, and mathematical or statistical model(s).                                                                                                                   | Manuscript: Methods<br>Additional file 1: Sections 2.0, 3.0                                                                                                          |
| 11                                                                                                    | Describe how candidate models were evaluated and how the final model(s) were selected.                                                                                                                                                                                                                                                                                                    | Manuscript: Methods<br>Additional file 1: Sections 3.0, 4.0                                                                                                          |
| 12                                                                                                    | Provide the results of an evaluation of model performance, if done, as well as the results of any relevant sensitivity analysis.                                                                                                                                                                                                                                                          | Manuscript: Methods<br>Additional file 1: Section 4.0<br>Additional file 1: Figures 2, 3, 4<br>Additional file 1: Table S8                                           |
| 13                                                                                                    | Describe methods for calculating uncertainty of the estimates. State which sources of uncertainty were, and were not, accounted for in the uncertainty analysis.                                                                                                                                                                                                                          | Manuscript: Methods and Discussion<br>Additional file 1: Sections 3.0                                                                                                |
| 14                                                                                                    | State how analytic or statistical source code used to generate estimates can be accessed.                                                                                                                                                                                                                                                                                                 | <a href="https://github.com/ihmeuw/lbd/tree/ors-rhf-2020">https://github.com/ihmeuw/lbd/tree/ors-rhf-2020</a> ( <i>link live available upon publication</i> )        |
| <b>Results and Discussion</b>                                                                         |                                                                                                                                                                                                                                                                                                                                                                                           |                                                                                                                                                                      |
| 15                                                                                                    | Provide published estimates in a file format from which data can be efficiently extracted.                                                                                                                                                                                                                                                                                                | Additional file 1: Tables 9, 10, 11<br>Raster files for spatial data and CSVs of estimates at Global Health Data Exchange ( <i>link available upon publication</i> ) |
| 16                                                                                                    | Report a quantitative measure of the uncertainty of the estimates (e.g. uncertainty intervals).                                                                                                                                                                                                                                                                                           | Manuscript: Results and Figures<br>Additional file 1: Section 3.0<br>Additional file 1: Tables 9, 10, 11                                                             |
| 17                                                                                                    | Interpret results in light of existing evidence. If updating a previous set of estimates, describe the reasons for changes in estimates.                                                                                                                                                                                                                                                  | Manuscript: Discussion                                                                                                                                               |
| 18                                                                                                    | Discuss limitations of the estimates. Include a discussion of any modelling assumptions or data limitations that affect interpretation of the estimates.                                                                                                                                                                                                                                  | Manuscript: Discussion                                                                                                                                               |

538 **Additional file 1: Table S2. Input data sources**

539 Data sources included in the study, listed by country, global health data exchange (GHDx) unique identifier (NID),  
 540 source, and year of survey (median interview year across primary sampling units).

541

| Country      | GHDx NID | Source      | Year |
|--------------|----------|-------------|------|
| Mali         | 20315    | MACRO DHS   | 2001 |
|              | 20274    | MACRO DHS   | 2006 |
|              | 270627   | UNICEF MICS | 2010 |
|              | 77388    | MACRO DHS   | 2012 |
|              | 248224   | UNICEF MICS | 2015 |
|              | 398033   | MACRO DHS   | 2018 |
| Senegal      | 27044    | UNICEF MICS | 2000 |
|              | 26855    | MACRO DHS   | 2005 |
|              | 56063    | MACRO DHS   | 2011 |
|              | 111432   | MACRO DHS   | 2013 |
|              | 191270   | MACRO DHS   | 2014 |
|              | 218592   | MACRO DHS   | 2015 |
|              | 287639   | UNICEF MICS | 2015 |
|              | 286772   | MACRO DHS   | 2016 |
|              | 353526   | MACRO DHS   | 2017 |
| Sierra Leone | 11639    | UNICEF MICS | 2000 |
|              | 11649    | UNICEF MICS | 2005 |
|              | 21258    | MACRO DHS   | 2008 |
|              | 76700    | UNICEF MICS | 2010 |
|              | 131467   | MACRO DHS   | 2013 |
|              | 218619   | UNICEF MICS | 2017 |

542

543

544 **Additional file 1: Table S3. Only recommended home fluid (only RHF) definition adjustments**  
 545 Estimates of only RHF coverage for each survey that was adjusted by methods described in Additional file 1:  
 546 Section 1.2. Coverage before adjustment is shown as “unadjusted” and coverage after adjustment is shown as  
 547 “adjusted”.

548

| NID    | Country | Source      | Start Year | Unadjusted | Adjusted |
|--------|---------|-------------|------------|------------|----------|
| 11639  | SLE     | UNICEF_MICS | 2000       | 0.176805   | 0.150391 |
| 27044  | SEN     | UNICEF_MICS | 2000       | 0.5134     | 0.42325  |
| 248224 | MLI     | UNICEF_MICS | 2015       | 0.028571   | 0.028619 |
| 270627 | MLI     | UNICEF_MICS | 2010       | 0.147106   | 0.142821 |
| 287639 | SEN     | UNICEF_MICS | 2015       | 0.189884   | 0.176073 |

549

550 **Additional file 1: Table S4. No oral rehydration therapy (No ORT) definition adjustments**  
 551 Estimates of no ORT (treatment with neither ORS nor RHF) coverage for each survey that was adjusted by methods  
 552 described in Additional file 1: Section 1.2. Coverage before adjustment is shown as “unadjusted” and coverage after  
 553 adjustment is shown as “adjusted”.

554

| NID    | Country | Source      | Start Year | Unadjusted | Adjusted |
|--------|---------|-------------|------------|------------|----------|
| 11639  | SLE     | UNICEF_MICS | 2000       | 0.321169   | 0.367994 |
| 27044  | SEN     | UNICEF_MICS | 2000       | 0.399272   | 0.470408 |
| 248224 | MLI     | UNICEF_MICS | 2015       | 0.751126   | 0.748186 |
| 270627 | MLI     | UNICEF_MICS | 2010       | 0.744623   | 0.746195 |
| 287639 | SEN     | UNICEF_MICS | 2015       | 0.511869   | 0.534582 |

555

556



557 **Additional file 1: Table S5. Covariates used in mapping**

558 A variety of socio-economic and environmental variables were used to predict any ORS, only RHF, and no ORT coverage. Where available, the finest spatio-  
 559 temporal resolution of gridded data sets was used.

560

| Covariate                                                                   | Temporal Resolution | Source                                | Reference                                                                                                                                                                                                                                                                                                                                                                                                                                                                                                                                                                                                                                                                                                                                                                                                                                                                                                                                                                                                                       |
|-----------------------------------------------------------------------------|---------------------|---------------------------------------|---------------------------------------------------------------------------------------------------------------------------------------------------------------------------------------------------------------------------------------------------------------------------------------------------------------------------------------------------------------------------------------------------------------------------------------------------------------------------------------------------------------------------------------------------------------------------------------------------------------------------------------------------------------------------------------------------------------------------------------------------------------------------------------------------------------------------------------------------------------------------------------------------------------------------------------------------------------------------------------------------------------------------------|
| Access to cities                                                            | Static              | Oxford                                | Weiss, D., Nelson, A., Gibson, H., <i>et al.</i> A global map of travel time to cities to assess inequalities in accessibility in 2015. <i>Nature</i> <b>533</b> , 333–336 (2018).                                                                                                                                                                                                                                                                                                                                                                                                                                                                                                                                                                                                                                                                                                                                                                                                                                              |
| Ratio of children dependents (age 0 to 14) to working adults (age 15 to 64) | Static              | WorldPop (derived)                    | Lloyd, C.T., Sorichetta, A., & Tatem, A.J. High resolution global gridded data for use in population studies. <i>Sci Data</i> <b>4</b> , 170001 (2017). <a href="https://doi.org/10.1038/sdata.2017.1">https://doi.org/10.1038/sdata.2017.1</a><br><br>WorldPop. Get data. Available at: <a href="http://www.worldpop.org.uk/data/get_data/">http://www.worldpop.org.uk/data/get_data/</a> . (Accessed: 25th July 2017)                                                                                                                                                                                                                                                                                                                                                                                                                                                                                                                                                                                                         |
| Distance from rivers or lakes                                               | Static              | Natural Earth Data (derived)          | Natural Earth. Rivers and lake centerlines dataset. Available at: <a href="http://www.naturalearthdata.com/downloads/10m-physical-vectors/10m-rivers-lake-centerlines/">http://www.naturalearthdata.com/downloads/10m-physical-vectors/10m-rivers-lake-centerlines/</a> . (Accessed: 24th July 2017)                                                                                                                                                                                                                                                                                                                                                                                                                                                                                                                                                                                                                                                                                                                            |
| Nighttime lights <sup>TV</sup>                                              | Annual              | NOAA DMSP satellite program (derived) | Savory, D.J., Andrade-Pacheco, R., Gething, P.W., Midekisa, A., Bennett, A., & Sturrock, H.J.W. Intercalibration and Gaussian Process Modelling of Nighttime Lights Imagery for Measuring Urbanization Trends in Africa 2000–2013. <i>Remote Sens.</i> <b>9</b> , 713 (2017). Available at: <a href="http://www.mdpi.com/2072-4292/9/7/713">http://www.mdpi.com/2072-4292/9/7/713</a>                                                                                                                                                                                                                                                                                                                                                                                                                                                                                                                                                                                                                                           |
| Elevation                                                                   | Static              | NOAA GLOBE                            | Hastings, David A. and Paula K. Dunbar. Global Land One-kilometer Base Elevation (GLOBE) Digital Elevation Model, Documentation, Volume 1.0. Key to Geophysical Records Documentation (KGRD) 34. National Oceanic and Atmospheric Administration, National Geophysical Data Center, 325 Broadway, Boulder, Colorado 80303, U.S.A (1999).<br>GLOBE Task Team and others (Hastings, David A., Paula K. Dunbar, Gerald M. Elphinstone, Mark Bootz, Hiroshi Murakami, Hiroshi Maruyama, Hiroshi Masaharu, Peter Holland, John Payne, Nevin A. Bryant, Thomas L. Logan, J.-P. Muller, Gunter Schreier, and John S. MacDonald), eds., 1999. The Global Land One-kilometer Base Elevation (GLOBE) Digital Elevation Model, Version 1.0. National Oceanic and Atmospheric Administration, National Geophysical Data Center, 325 Broadway, Boulder, Colorado 80305-3328, U.S.A. Available at: <a href="https://www.ngdc.noaa.gov/mgg/topo/globe.html">https://www.ngdc.noaa.gov/mgg/topo/globe.html</a> . (Accessed: 16th February 2017) |
| Fertility                                                                   | Annual              | WorldPop (derived)                    | Lloyd, C.T., Sorichetta, A., & Tatem, A.J. High resolution global gridded data for use in population studies. <i>Sci. Data</i> <b>4</b> , 170001 (2017). <a href="https://doi.org/10.1038/sdata2017.1">https://doi.org/10.1038/sdata2017.1</a><br><br>WorldPop. Get data. Available at: <a href="http://www.worldpop.org.uk/data/get_data/">http://www.worldpop.org.uk/data/get_data/</a> . (Accessed: 25th July 2017)                                                                                                                                                                                                                                                                                                                                                                                                                                                                                                                                                                                                          |
| Population <sup>TV</sup>                                                    | Annual              | WorldPop                              | Lloyd, C.T., Sorichetta, A., & Tatem, A.J. High resolution global gridded data for use in population studies. <i>Sci. Data</i> <b>4</b> , 170001 (2017). <a href="https://doi.org/10.1038/sdata2017.1">https://doi.org/10.1038/sdata2017.1</a><br><br>WorldPop. Get data. Available at: <a href="http://www.worldpop.org.uk/data/get_data/">http://www.worldpop.org.uk/data/get_data/</a> . (Accessed: 25th July 2017)                                                                                                                                                                                                                                                                                                                                                                                                                                                                                                                                                                                                          |
| Aridity <sup>TV</sup>                                                       | Annual              | WorldClim (derived)                   | Zomer, R.J., Trabucco, A., Bossio, D.A., & Verchot, L.V. Climate change mitigation: A spatial analysis of global land suitability for clean development mechanism afforestation and reforestation. <i>Agriculture, Ecosystems &amp; Environment</i> <b>126</b> , 67–80 (2008). <a href="https://doi.org/10.1016/j.agee.2008.01.014">https://doi.org/10.1016/j.agee.2008.01.014</a><br><br>Global Aridity Index (Global-Aridity) and Global Potential Evapo-Transpiration (Global-PET) Methodology and Geospatial Dataset Description (2009). Available at: <a href="http://www.cgiar-csi.org/data/global-aridity-and-pet-database">http://www.cgiar-csi.org/data/global-aridity-and-pet-database</a>                                                                                                                                                                                                                                                                                                                            |
| Urban or rural <sup>TV</sup>                                                | Annual              | European Commission/GHS               | Pesaresi, M., <i>et al.</i> Operating procedure for the production of the Global Human Settlement Layer from Landsat data of the epochs 1975, 1990, 2000, and 2014. (Publications Office of the European Union, 2016). Available at:                                                                                                                                                                                                                                                                                                                                                                                                                                                                                                                                                                                                                                                                                                                                                                                            |

| Covariate                                                                         | Temporal Resolution | Source                          | Reference                                                                                                                                                                                                                                                                                                                                                                                                                                                                                                                                                                                                                                           |
|-----------------------------------------------------------------------------------|---------------------|---------------------------------|-----------------------------------------------------------------------------------------------------------------------------------------------------------------------------------------------------------------------------------------------------------------------------------------------------------------------------------------------------------------------------------------------------------------------------------------------------------------------------------------------------------------------------------------------------------------------------------------------------------------------------------------------------|
|                                                                                   |                     |                                 | <a href="http://ghsl.jrc.ec.europa.eu/data.php">http://ghsl.jrc.ec.europa.eu/data.php</a>                                                                                                                                                                                                                                                                                                                                                                                                                                                                                                                                                           |
| <b>Urban proportion of the location<sup>TV</sup></b>                              | Annual              | MODIS                           | Friedl, M. & Sulla-Menasse, D. MCD12Q1v006.MODIS/Terra+Aqua Land Cover Type Yearly L3 Global 500m SIN Grid <a href="https://doi.org/10.5067/MODIS/MCD12Q1.006">https://doi.org/10.5067/MODIS/MCD12Q1.006</a> (NASA EOSDIS Land Processes DAAC, 2019)                                                                                                                                                                                                                                                                                                                                                                                                |
| <b>Irrigation</b>                                                                 | Static              | University of Frankfurt and FAO | Siebert, S., Doll, P., Hoogeveen, J., Faures, J.-M., Frenken, K., & Feick, S. Development and validation of the global map of irrigation areas. <i>Hydrology and Earth System Sciences</i> <b>9</b> , (5) 535–547 (2005).<br><br>Goethe-Universität. Generation of a digital global map of irrigation areas. Available at: <a href="https://www.unifrankfurt.de/45218039/Global_Irrigation_Map">https://www.unifrankfurt.de/45218039/Global_Irrigation_Map</a> . (Accessed: 25th July 2017). Also from: <a href="http://www.fao.org/nr/water/aquastat/irrigationmap/index10.stm">http://www.fao.org/nr/water/aquastat/irrigationmap/index10.stm</a> |
| <b>Number of people whose daily vitamin A needs could be met (nutrient yield)</b> | Static              | Herrero et al. (modelled)       | Herrero, M., <i>et al.</i> Farming and the geography of nutrient production for human use: a transdisciplinary analysis. <i>Lancet Planet. Health</i> <b>1</b> , e33–e42 (2017).                                                                                                                                                                                                                                                                                                                                                                                                                                                                    |
| <b>Prevalence of under-5 stunting<sup>TV</sup></b>                                | Annual              | Internally modelled             | Kinyoki, D.K., Osgood-Zimmerman, A.E., Pickering, B.V., et al. Mapping child growth failure across low- and middle-income countries. <i>Nature</i> <b>577</b> , 231–234 (2020). <a href="http://doi.org/10.1038/s41586-019-1878-8">http://doi.org/10.1038/s41586-019-1878-8</a>                                                                                                                                                                                                                                                                                                                                                                     |
| <b>Prevalence of under-5 wasting<sup>TV</sup></b>                                 | Annual              | Internally modelled             | Kinyoki, D.K., Osgood-Zimmerman, A.E., Pickering, B.V., et al. Mapping child growth failure across low- and middle-income countries. <i>Nature</i> <b>577</b> , 231–234 (2020). <a href="http://doi.org/10.1038/s41586-019-1878-8">http://doi.org/10.1038/s41586-019-1878-8</a>                                                                                                                                                                                                                                                                                                                                                                     |
| <b>Maternal education</b>                                                         | Annual              | Internally modelled             | Graetz, N., Woyczynski, L., Wilson, K.F. <i>et al.</i> Mapping disparities in education across low- and middle-income countries. <i>Nature</i> <b>577</b> , 235–238 (2020). <a href="https://doi.org/10.1038/s41586-019-1872-1">https://doi.org/10.1038/s41586-019-1872-1</a>                                                                                                                                                                                                                                                                                                                                                                       |

562 **Additional file 1: Table S6. Covariates used in ensemble covariate modelling via stacked generalisation, stratified by country**

563 Covariates used in each modelling region for the any ORS, only RHF, and no ORT generalised additive model (GAM), penalised regression with the elastic net  
 564 penalty, and boosted regression tree (BRT) models in each country Mali, Senegal, and Sierra Leone.  
 565

| Covariate                   | any ORS |         |              | only RHF |         |              | no ORT |         |              |
|-----------------------------|---------|---------|--------------|----------|---------|--------------|--------|---------|--------------|
|                             | Mali    | Senegal | Sierra Leone | Mali     | Senegal | Sierra Leone | Mali   | Senegal | Sierra Leone |
| Antenatal care coverage     | ✓       | ✓       |              | ✓        | ✓       |              | ✓      | ✓       |              |
| Access to cities            | ✓       | ✓       | ✓            | ✓        | ✓       | ✓            | ✓      | ✓       | ✓            |
| Aridity                     |         | ✓       |              | ✓        | ✓       |              | ✓      | ✓       |              |
| Ratio of dependents         | ✓       |         |              | ✓        |         |              | ✓      |         |              |
| Distance to rivers or lakes | ✓       | ✓       | ✓            | ✓        | ✓       | ✓            | ✓      | ✓       | ✓            |
| Maternal education          | ✓       | ✓       | ✓            | ✓        | ✓       | ✓            | ✓      | ✓       | ✓            |
| Elevation                   | ✓       | ✓       | ✓            | ✓        | ✓       | ✓            | ✓      | ✓       | ✓            |
| Fertility                   |         | ✓       | ✓            |          | ✓       | ✓            |        | ✓       | ✓            |
| Urban or rural              |         | ✓       | ✓            |          | ✓       | ✓            |        | ✓       | ✓            |
| Nutrient yield              | ✓       | ✓       | ✓            | ✓        | ✓       | ✓            | ✓      | ✓       | ✓            |
| Irrigation                  | ✓       | ✓       | ✓            | ✓        | ✓       | ✓            | ✓      | ✓       | ✓            |
| Under-5 stunting            | ✓       |         |              | ✓        |         |              | ✓      |         |              |
| Under-5 wasting             | ✓       | ✓       | ✓            | ✓        | ✓       | ✓            | ✓      | ✓       | ✓            |
| Population                  |         | ✓       |              |          | ✓       |              |        | ✓       |              |

566

567 **Additional file 1: Table S7. Fitted parameters**

568 Posterior lower, median, and upper quantiles (0.025%, 0.50%, 0.975%) for the main parameters by region. The first four rows provide information on  
 569 the fixed effects: the intercept (int) and the the covariates (gam, gbm, and enet) corresponding to the predicted ensemble rasters. Fitted values for the  
 570 spatio-temporal field hyperparameters and the precision parameters (inverse variance) for random effects are shown in the bottom four rows. Table **a)**  
 571 presents fitted parameters for any ORS, table **b)** presents fitted parameters for only RHF, and table **c)** presents fitted parameters for no ORT.

572 **a) any ORS**

|                     | Quantiles | int     | gam     | gbm     | enet   | Nominal Range | Nominal Variance | Ar1 p   | precis     |
|---------------------|-----------|---------|---------|---------|--------|---------------|------------------|---------|------------|
| <b>Mali</b>         | 0.025     | -0.2474 | -0.1367 | -0.0463 | 0.3555 | 0.9857        | 0.3695           | -0.6220 | 1311.8408  |
|                     | 0.500     | -0.0201 | 0.1535  | 0.1915  | 0.6532 | 2.6662        | 0.5614           | 0.3327  | 13415.7514 |
|                     | 0.975     | 0.2066  | 0.4518  | 0.4288  | 0.9470 | 4.8910        | 0.7519           | 0.7688  | 68424.7677 |
| <b>Senegal</b>      | 0.025     | -0.1934 | -0.1482 | 0.0681  | 0.3098 | 0.7369        | 0.1704           | -0.3712 | 4.0874     |
|                     | 0.500     | -0.0853 | 0.1284  | 0.3112  | 0.5619 | 2.2736        | 0.2686           | 0.1675  | 6.5593     |
|                     | 0.975     | 0.0225  | 0.4004  | 0.5549  | 0.8140 | 8.5983        | 0.4101           | 0.6523  | 10.7206    |
| <b>Sierra Leone</b> | 0.025     | -0.6037 | 0.0670  | -0.4337 | 0.4371 | 1.9083        | 0.4314           | 0.2517  | 1283.2924  |
|                     | 0.500     | -0.1194 | 0.4061  | -0.1516 | 0.7455 | 3.6275        | 0.6563           | 0.6923  | 12920.7753 |
|                     | 0.975     | 0.3648  | 0.7471  | 0.1302  | 1.0516 | 7.1172        | 1.0085           | 0.8779  | 66482.4416 |

573

574

575

576

577

578

579 **b) only RHF**

|                     | Quantiles | int     | gam     | gbm     | enet   | Nominal Range | Nominal Variance | Ar1 $\rho$ | precis     |
|---------------------|-----------|---------|---------|---------|--------|---------------|------------------|------------|------------|
| <b>Mali</b>         | 0.025     | -0.9996 | -0.3120 | -0.1151 | 0.5765 | 1.8202        | 0.8994           | -0.5464    | 1232.2215  |
|                     | 0.500     | -0.6751 | -0.0066 | 0.1201  | 0.8853 | 2.4584        | 1.0824           | 0.1841     | 14377.7707 |
|                     | 0.975     | -0.3519 | 0.3038  | 0.3554  | 1.1907 | 3.4458        | 1.3079           | 0.5779     | 70673.4292 |
| <b>Senegal</b>      | 0.025     | -0.6738 | -0.2853 | -0.1187 | 0.6202 | 0.4553        | 0.1695           | -0.3510    | 1181.8001  |
|                     | 0.500     | -0.4526 | -0.0448 | 0.1396  | 0.9036 | 1.3965        | 0.2838           | 0.5125     | 12412.5203 |
|                     | 0.975     | -0.2357 | 0.1985  | 0.3944  | 1.1901 | 4.6335        | 0.4795           | 0.9001     | 65495.7142 |
| <b>Sierra Leone</b> | 0.025     | -0.6821 | -0.8899 | 0.0041  | 0.9343 | 1.8194        | 0.4857           | 0.0029     | 1431.9786  |
|                     | 0.500     | -0.0291 | -0.4294 | 0.0158  | 1.4125 | 4.3478        | 0.7837           | 0.7161     | 14169.6830 |
|                     | 0.975     | 0.6216  | 0.0499  | 0.0299  | 1.8716 | 11.5097       | 1.2720           | 0.9308     | 70880.2595 |

580

581

582

583

584

585

586

587

588

589 c) no ORT

|                     | Quantiles | int     | gam     | gbm     | enet   | Nominal Range | Nominal Variance | Ar1 $\rho$ | precis     |
|---------------------|-----------|---------|---------|---------|--------|---------------|------------------|------------|------------|
| <b>Mali</b>         | 0.025     | -0.0772 | 0.0476  | -0.0932 | 0.3963 | 1.7220        | 0.6232           | -0.4380    | 1161.2776  |
|                     | 0.500     | 0.1378  | 0.3204  | 0.0059  | 0.6639 | 2.4214        | 0.7556           | 0.1844     | 14359.1791 |
|                     | 0.975     | 0.3529  | 0.5926  | 0.1262  | 0.9303 | 3.2063        | 0.8891           | 0.5638     | 71009.8751 |
| <b>Senegal</b>      | 0.025     | -0.0238 | -0.1587 | 0.1524  | 0.2488 | 0.5286        | 0.1327           | -0.4712    | 4.8956     |
|                     | 0.500     | 0.0612  | 0.0885  | 0.4006  | 0.5118 | 1.6862        | 0.2190           | 0.1981     | 8.2698     |
|                     | 0.975     | 0.1462  | 0.3301  | 0.6488  | 0.7774 | 6.3994        | 0.3603           | 0.7214     | 14.0866    |
| <b>Sierra Leone</b> | 0.025     | -0.2032 | 0.0334  | 0.0066  | 0.4215 | 1.1009        | 0.3947           | 0.3076     | 1288.8710  |
|                     | 0.500     | 0.0910  | 0.2903  | 0.0332  | 0.6764 | 2.0876        | 0.5336           | 0.6707     | 12570.0690 |
|                     | 0.975     | 0.3847  | 0.5495  | 0.0599  | 0.9286 | 5.7115        | 0.7197           | 0.8499     | 67079.4773 |

590

591 **Additional file 1: Table S8. In-sample and out-of-sample fit statistics for any ORS, only RHF, and no**  
 592 **ORT**

593 Calculated mean error (Mean err.), root-mean-squared-error (RMSE), median sample side (Median SS),  
 594 correlation between data and predictions (Corr.), and the proportion of observed out-of-sample data that fall  
 595 within our predicted 95% uncertainty intervals (95% Cov.) aggregated to the second administrative unit. Fit  
 596 statistics are shown for a) any ORS, b) only RHF, and c) no ORT and correspond to Additional file 1:  
 597 Figures S2–S4.

598 **a) any ORS**

| Country              | Mean Err. | RMSE   | Median SS | Corr. | 95% Cov. |
|----------------------|-----------|--------|-----------|-------|----------|
| <b>In-sample</b>     |           |        |           |       |          |
| Mali                 | -0.019    | 58.544 | 33.000    | 0.767 | 0.952    |
| Senegal              | 0.003     | 53.023 | 32.000    | 0.809 | 0.987    |
| Sierra Leone         | 0.002     | 64.430 | 47.843    | 0.924 | 0.974    |
| <b>Out-of-sample</b> |           |        |           |       |          |
| Mali                 | -0.022    | 58.545 | 33.000    | 0.505 | 0.914    |
| Senegal              | 0.003     | 53.023 | 32.000    | 0.631 | 0.980    |
| Sierra Leone         | 0.004     | 64.428 | 47.843    | 0.787 | 0.887    |

599 **b) only RHF**

| Country              | Mean Err. | RMSE     | Median SS | Corr.    | 95% Cov. |
|----------------------|-----------|----------|-----------|----------|----------|
| <b>In-sample</b>     |           |          |           |          |          |
| Mali                 | 0.025201  | 58.42732 | 32.83201  | 0.83822  | 0.967538 |
| Senegal              | 0.031833  | 53.71814 | 32        | 0.958387 | 0.767769 |
| Sierra Leone         | -0.00119  | 86.05985 | 54.40851  | 0.901452 | 0.989033 |
| <b>Out-of-sample</b> |           |          |           |          |          |
| Mali                 | 0.026229  | 58.42661 | 32.83201  | 0.489817 | 0.951237 |
| Senegal              | 0.025581  | 53.72277 | 32        | 0.902352 | 0.844649 |
| Sierra Leone         | -0.00587  | 86.06338 | 54.40851  | 0.804126 | 0.956522 |

600 **c) no ORT**

| Country              | Mean Err. | RMSE     | Median SS | Corr.    | 95% Cov. |
|----------------------|-----------|----------|-----------|----------|----------|
| <b>In-sample</b>     |           |          |           |          |          |
| Mali                 | 0.008091  | 58.43968 | 32.83201  | 0.77476  | 0.983894 |
| Senegal              | -0.00586  | 53.74613 | 32        | 0.837809 | 0.984748 |
| Sierra Leone         | -9.92E-05 | 86.05907 | 54.40851  | 0.92928  | 0.985337 |
| <b>Out-of-sample</b> |           |          |           |          |          |
| Mali                 | 0.002997  | 58.44338 | 32.83201  | 0.440505 | 0.936616 |
| Senegal              | -0.00753  | 53.74739 | 32        | 0.67921  | 0.932377 |
| Sierra Leone         | -0.0053   | 86.06305 | 54.40851  | 0.684657 | 0.926448 |

601 **Additional file 1: Table S9. Oral rehydration therapy coverage and numbers untreated by country and year.**  
 602 Oral rehydration therapy coverage estimates at the national level for a) Sierra Leone, b) Mali, and c) Senegal.  
 603

604 **a) Sierra Leone**

605 Coverage estimates at the national level for Any ORS, Only RHF, and No ORT from 2000 to 2017. Estimates are shown as percentages in the format:  
 606 mean (2.5%–97.5% uncertainty interval). Estimates of the number (in thousands) of children with diarrhea untreated with any ORS or with any ORT  
 607 (either ORS or RHF) are also shown. Mean numbers of children with diarrhea from 2000 to 2017 in each country were calculated using previous  
 608 estimates (42).  
 609

| Year | Coverage (percent) |                    |                    | Number untreated (thousands) |                    |
|------|--------------------|--------------------|--------------------|------------------------------|--------------------|
|      | Any ORS            | Only RHF           | No ORT             | Any ORS                      | Any ORT            |
| 2000 | 51.8 (48.1 – 55.5) | 12.4 (10.1 – 14.8) | 35.8 (31.9 – 39.5) | 17.1 (15.8 – 18.4)           | 12.7 (11.3 – 14)   |
| 2001 | 53.4 (42.5 – 63.6) | 11.1 (5.2 – 19.2)  | 35.6 (26.5 – 45)   | 17.3 (13.5 – 21.3)           | 13.2 (9.8 – 16.7)  |
| 2002 | 54.6 (41.9 – 66.3) | 9.7 (3.8 – 19.3)   | 35.7 (25.3 – 47.5) | 17.6 (13 – 22.5)             | 13.8 (9.8 – 18.4)  |
| 2003 | 55.8 (44.3 – 67.5) | 8.2 (2.9 – 16.9)   | 36 (25.7 – 46.9)   | 17.8 (13.1 – 22.4)           | 14.5 (10.3 – 18.9) |
| 2004 | 56 (45.9 – 65.7)   | 7.1 (3.1 – 13.3)   | 36.9 (27.4 – 47)   | 18.1 (14.1 – 22.3)           | 15.2 (11.3 – 19.3) |
| 2005 | 54.7 (50.6 – 58.2) | 6 (4.4 – 7.9)      | 39.3 (35.5 – 43.2) | 18.8 (17.4 – 20.5)           | 16.3 (14.7 – 17.9) |
| 2006 | 58.7 (49.8 – 67.4) | 6.3 (2.7 – 11.8)   | 35 (25.8 – 43.8)   | 17 (13.4 – 20.7)             | 14.4 (10.6 – 18.1) |
| 2007 | 61.6 (52 – 70)     | 6.4 (2.8 – 12.5)   | 32 (23.8 – 41.3)   | 15.5 (12.1 – 19.4)           | 12.9 (9.6 – 16.7)  |
| 2008 | 64.6 (59.9 – 69.2) | 6.2 (4.1 – 8.8)    | 29.3 (25.1 – 33.6) | 14 (12.2 – 15.9)             | 11.6 (9.9 – 13.3)  |
| 2009 | 69.6 (62.1 – 76.1) | 4.9 (2.3 – 8.7)    | 25.5 (19.4 – 33.1) | 11.8 (9.2 – 14.6)            | 9.9 (7.5 – 12.8)   |
| 2010 | 73.9 (71 – 76.5)   | 3.6 (2.6 – 5)      | 22.4 (20 – 25)     | 9.9 (8.9 – 11)               | 8.5 (7.6 – 9.5)    |
| 2011 | 77.2 (69.9 – 83.3) | 2.9 (1.2 – 5.6)    | 19.9 (13.9 – 27.4) | 8.5 (6.3 – 11.3)             | 7.5 (5.2 – 10.3)   |
| 2012 | 80.7 (73.9 – 85.9) | 2.2 (0.9 – 4.3)    | 17.1 (11.9 – 24)   | 7.2 (5.2 – 9.7)              | 6.3 (4.4 – 8.9)    |
| 2013 | 85.1 (83.3 – 86.7) | 1.5 (1 – 2.1)      | 13.5 (11.8 – 15.2) | 5.5 (4.9 – 6.1)              | 4.9 (4.3 – 5.5)    |
| 2014 | 82.3 (76.3 – 87.6) | 1.7 (0.7 – 3.6)    | 16 (10.8 – 22.2)   | 6.4 (4.5 – 8.6)              | 5.8 (3.9 – 8)      |
| 2015 | 79.9 (71.9 – 86.2) | 1.8 (0.6 – 4.1)    | 18.3 (12.2 – 26.2) | 7.2 (4.9 – 10)               | 6.5 (4.3 – 9.3)    |
| 2016 | 78.3 (71.1 – 84.1) | 1.7 (0.6 – 3.4)    | 20 (14.2 – 27.6)   | 7.6 (5.6 – 10.1)             | 7 (5 – 9.7)        |
| 2017 | 77.4 (74.2 – 80.3) | 1.5 (0.9 – 2.6)    | 21.1 (18.1 – 24.2) | 7.8 (6.8 – 8.9)              | 7.3 (6.3 – 8.4)    |

610



611 **b) Mali**

612 Coverage estimates at the national level for Any ORS, Only RHF, and No ORT from 2001 to 2018. Estimates are shown as percentages in the format:  
 613 mean (2.5%–97.5% uncertainty interval). Estimates of the number (in thousands) of children with diarrhea untreated with any ORS or with any ORT  
 614 (either ORS or RHF) are also shown. Mean numbers of children with diarrhea from 2000 to 2017 in each country were calculated using previous  
 615 estimates (42). For simplicity, 2018 numbers with diarrhea in Mali were assumed to be the same as 2017 numbers.  
 616

| Year | Coverage (percent) |                    |                    | Number untreated (thousands) |                     |
|------|--------------------|--------------------|--------------------|------------------------------|---------------------|
|      | Any ORS            | Only RHF           | No ORT             | Any ORS                      | Any ORT             |
| 2001 | 14.4 (11.8 – 17)   | 16.3 (13.7 – 19)   | 69.3 (67 – 71.3)   | 104.2 (101.1 – 107.4)        | 84.3 (81.5 – 86.8)  |
| 2002 | 15.3 (8.1 – 25)    | 12.8 (5.9 – 21.8)  | 71.9 (59.5 – 82.9) | 103.8 (91.9 – 112.7)         | 88.1 (72.9 – 101.7) |
| 2003 | 15.9 (8 – 26)      | 11.1 (5.2 – 19.9)  | 73 (60.2 – 83.6)   | 103.7 (91.2 – 113.4)         | 90 (74.2 – 103)     |
| 2004 | 16.3 (8.4 – 26.5)  | 10.2 (4.4 – 19)    | 73.5 (60.9 – 84.5) | 103.7 (91.2 – 113.6)         | 91.1 (75.5 – 104.7) |
| 2005 | 16.5 (8.8 – 26.2)  | 9.8 (4.2 – 17.7)   | 73.7 (61.5 – 83.8) | 104.5 (92.3 – 114)           | 92.2 (76.9 – 104.9) |
| 2006 | 14.6 (12.1 – 17.4) | 10.2 (7.9 – 12.7)  | 75.2 (72.7 – 77.4) | 108.2 (104.6 – 111.3)        | 95.3 (92.1 – 98.1)  |
| 2007 | 16.6 (8.9 – 26.3)  | 10 (4.4 – 18.2)    | 73.4 (61.1 – 83.9) | 107.1 (94.6 – 116.9)         | 94.2 (78.4 – 107.7) |
| 2008 | 16.9 (8.7 – 27.3)  | 10.1 (4.3 – 18.6)  | 73 (59.6 – 83.9)   | 107.9 (94.4 – 118.5)         | 94.8 (77.4 – 108.9) |
| 2009 | 16.3 (8.4 – 26.4)  | 11 (5.2 – 19.8)    | 72.7 (60.7 – 83.4) | 109.7 (96.5 – 120.1)         | 95.3 (79.6 – 109.3) |
| 2010 | 13.6 (11.2 – 16)   | 14.2 (11.8 – 16.6) | 72.1 (70.2 – 73.8) | 113.9 (110.8 – 117.1)        | 95.1 (92.6 – 97.4)  |
| 2011 | 19.3 (11.1 – 30.9) | 10.5 (5.1 – 18.4)  | 70.2 (57.4 – 80.5) | 105.5 (90.4 – 116.3)         | 91.8 (75.1 – 105.4) |
| 2012 | 29.8 (25.8 – 33.6) | 7.1 (4.9 – 10.2)   | 63.1 (59.7 – 66.6) | 90.5 (85.7 – 95.7)           | 81.4 (77 – 86)      |
| 2013 | 23.3 (13.9 – 34.3) | 6.8 (2.5 – 13.3)   | 69.9 (56.5 – 80.6) | 97.7 (83.7 – 109.6)          | 89 (72 – 102.6)     |
| 2014 | 22.2 (13.3 – 32.5) | 5.9 (2.4 – 12.1)   | 72 (59.8 – 82.3)   | 97.3 (84.4 – 108.4)          | 90 (74.7 – 102.9)   |
| 2015 | 23.1 (20.9 – 25.2) | 3.7 (2.5 – 5.1)    | 73.2 (71.1 – 75.3) | 93.8 (91.2 – 96.5)           | 89.3 (86.8 – 91.8)  |
| 2016 | 22 (12.7 – 33.7)   | 4.9 (1.8 – 10.1)   | 73.1 (60.5 – 83.8) | 92.2 (78.4 – 103.2)          | 86.4 (71.5 – 99)    |
| 2017 | 22.6 (13.3 – 33)   | 4.6 (1.7 – 9.5)    | 72.8 (60.5 – 83.4) | 88 (76.2 – 98.5)             | 82.8 (68.7 – 94.9)  |
| 2018 | 23 (20.5 – 25.6)   | 4.3 (2.9 – 5.9)    | 72.7 (70.3 – 75.2) | 87.5 (84.6 – 90.4)           | 82.7 (79.9 – 85.5)  |

617  
618

619 **c) Senegal**

620 Coverage estimates at the national level for Any ORS, Only RHF, and No ORT from 2000 to 2017. Estimates are shown as percentages in the format:  
 621 mean (2.5%–97.5% uncertainty interval). Estimates of the number (in thousands) of children with diarrhea untreated with any ORS or with any ORT  
 622 (either ORS or RHF) are also shown. Mean numbers of children with diarrhea from 2000 to 2017 in each country were calculated using previous  
 623 estimates (42).  
 624

| Year | Coverage (percent) |                    |                    | Number untreated (thousands) |                    |
|------|--------------------|--------------------|--------------------|------------------------------|--------------------|
|      | Any ORS            | Only RHF           | No ORT             | Any ORS                      | Any ORT            |
| 2000 | 13 (10 – 16.6)     | 34.8 (30.6 – 38.8) | 52.3 (48 – 56.6)   | 74.1 (71 – 76.7)             | 44.5 (40.9 – 48.2) |
| 2001 | 17 (13 – 21.8)     | 24.1 (19.4 – 29.2) | 58.8 (53.7 – 63.7) | 73.8 (69.6 – 77.4)           | 52.4 (47.8 – 56.7) |
| 2002 | 19.7 (15.1 – 24.8) | 20.1 (15.4 – 24.9) | 60.3 (55.2 – 65.7) | 77.1 (72.2 – 81.5)           | 57.9 (53 – 63.1)   |
| 2003 | 19.4 (15 – 24.3)   | 12.6 (9.2 – 16.8)  | 67.9 (62.2 – 73)   | 84.1 (79 – 88.7)             | 70.9 (64.9 – 76.2) |
| 2004 | 20.7 (16.4 – 24.8) | 10.6 (7.7 – 14)    | 68.7 (63.5 – 73.5) | 88.9 (84.3 – 93.7)           | 77 (71.2 – 82.4)   |
| 2005 | 21.4 (18.1 – 24.9) | 9 (6.8 – 11.5)     | 69.6 (65.8 – 73.1) | 91.9 (87.8 – 95.8)           | 81.4 (77 – 85.5)   |
| 2006 | 22.4 (18.5 – 26.4) | 6.6 (4.5 – 9)      | 71 (66.7 – 75.5)   | 91.5 (86.7 – 96.1)           | 83.7 (78.6 – 89)   |
| 2007 | 23.8 (20.1 – 27.8) | 4.3 (3 – 6)        | 71.8 (67.3 – 75.8) | 88.6 (84 – 92.9)             | 83.6 (78.2 – 88.2) |
| 2008 | 25.4 (21.6 – 29.7) | 3.6 (2.5 – 5)      | 70.9 (66.4 – 75.2) | 84.5 (79.7 – 88.9)           | 80.4 (75.3 – 85.2) |
| 2009 | 25.5 (21.5 – 29.6) | 3.5 (2.4 – 5)      | 71 (66.4 – 75.4)   | 82.3 (77.7 – 86.6)           | 78.4 (73.3 – 83.2) |
| 2010 | 25.3 (21.7 – 29.2) | 3.5 (2.4 – 4.9)    | 71.2 (66.6 – 75.2) | 81.4 (77.1 – 85.2)           | 77.5 (72.5 – 81.9) |
| 2011 | 23.1 (20.3 – 26.1) | 3.6 (2.7 – 4.7)    | 73.3 (69.8 – 76.5) | 83.6 (80.2 – 86.5)           | 79.6 (75.8 – 83.1) |
| 2012 | 24 (20.3 – 28.3)   | 3.7 (2.6 – 5.2)    | 72.2 (67.7 – 76.5) | 82.1 (77.5 – 86.1)           | 78.1 (73.2 – 82.7) |
| 2013 | 24.2 (21.3 – 27.5) | 3.8 (2.9 – 4.9)    | 72 (68.3 – 75.3)   | 81.5 (77.9 – 84.7)           | 77.4 (73.4 – 81)   |
| 2014 | 23.7 (20.9 – 26.6) | 3.7 (2.8 – 4.8)    | 72.6 (69.3 – 75.6) | 81.6 (78.5 – 84.6)           | 77.6 (74.1 – 80.9) |
| 2015 | 27.4 (24.5 – 30.3) | 3.6 (2.8 – 4.5)    | 69 (65.8 – 72.2)   | 77.3 (74.3 – 80.5)           | 73.5 (70.1 – 76.9) |
| 2016 | 25.8 (22.5 – 29.1) | 3.2 (2.4 – 4.1)    | 71 (67.4 – 74.7)   | 78.9 (75.4 – 82.5)           | 75.6 (71.7 – 79.5) |
| 2017 | 27.1 (23.4 – 30.7) | 2.6 (1.9 – 3.6)    | 70.3 (66.5 – 74)   | 77.8 (73.9 – 81.6)           | 74.9 (70.9 – 78.9) |

625  
626

627 **Additional file 1: Table S10. Oral rehydration therapy coverage by district/cercle/department and year.**

628 Oral rehydration therapy coverage estimates subnationally for a) Sierra Leone, b) Mali, and c) Senegal.

629

630 **a) Sierra Leone**

631 Coverage estimates by Province, District, Treatment (Any ORS, Only RHF, and No ORT) for 2000, 2009, 2013, and 2017. Estimates are shown as  
 632 percentages in the format: mean (2.5%–97.5% uncertainty interval). Groups Western, Northern, and Southern correspond to regions shown in Figure  
 633 2.  
 634

| Group    | Province  | District      | Treatment         | 2000               | 2009               | 2013               | 2017               |
|----------|-----------|---------------|-------------------|--------------------|--------------------|--------------------|--------------------|
| Western  | Western   | Western Rural | Any ORS           | 62.2 (54.6 – 69.2) | 75.2 (62.6 – 84.5) | 86.7 (82 – 90.4)   | 73.8 (64.9 – 81.3) |
|          | Western   | Western Rural | Only RHF          | 23.3 (16.8 – 30.8) | 21.2 (12.1 – 33.9) | 12.1 (8.5 – 16.7)  | 24.3 (17.2 – 33.1) |
|          | Western   | Western Rural | No ORT            | 14.5 (10.4 – 19.2) | 3.6 (1.3 – 7.9)    | 1.2 (0.5 – 2.3)    | 2 (0.7 – 4.2)      |
|          | Western   | Western Urban | Any ORS           | 61.1 (53.5 – 68.1) | 72.5 (59 – 82.1)   | 84.8 (79.3 – 89.1) | 69.2 (60.2 – 76.7) |
|          | Western   | Western Urban | Only RHF          | 24.3 (18.2 – 31.2) | 23.7 (13.7 – 37.4) | 13.9 (9.7 – 19.4)  | 28.7 (21.1 – 38.7) |
|          | Western   | Western Urban | No ORT            | 14.6 (10.2 – 19.8) | 3.8 (1.3 – 8.4)    | 1.4 (0.6 – 2.6)    | 2.1 (0.7 – 4.5)    |
| Northern | Northern  | Bombali       | Any ORS           | 32.7 (25.3 – 40.7) | 72.9 (61.8 – 81.8) | 85.7 (81.6 – 89.4) | 72.9 (65.1 – 79.9) |
|          | Northern  | Bombali       | Only RHF          | 49.6 (41.3 – 57.9) | 22.4 (13.7 – 33.8) | 12.9 (9.5 – 16.8)  | 25.6 (18.1 – 33.8) |
|          | Northern  | Bombali       | No ORT            | 17.7 (12.5 – 23.8) | 4.7 (1.8 – 9.7)    | 1.4 (0.7 – 2.4)    | 1.5 (0.6 – 3.2)    |
|          | Northern  | Kambia        | Any ORS           | 35.5 (27.3 – 44.3) | 68 (55.8 – 78.6)   | 79.4 (75.7 – 83.1) | 70.5 (61.1 – 78)   |
|          | Northern  | Kambia        | Only RHF          | 44.1 (33.9 – 54)   | 28.2 (17.8 – 40.7) | 19.4 (15.8 – 23.1) | 27.9 (20.1 – 37.2) |
|          | Northern  | Kambia        | No ORT            | 20.3 (14.4 – 27.4) | 3.7 (1.3 – 8.1)    | 1.2 (0.6 – 2.3)    | 1.6 (0.6 – 3.7)    |
|          | Northern  | Koinadugu     | Any ORS           | 38.2 (29 – 48.3)   | 68.2 (56.8 – 78.6) | 76.3 (71 – 81.3)   | 74.2 (67 – 80)     |
|          | Northern  | Koinadugu     | Only RHF          | 46 (36.1 – 56.6)   | 27.3 (17.6 – 38.7) | 22.2 (17.3 – 27.6) | 24.4 (18.5 – 31.5) |
|          | Northern  | Koinadugu     | No ORT            | 15.8 (10.2 – 23.1) | 4.5 (1.6 – 9.7)    | 1.4 (0.8 – 2.5)    | 1.4 (0.6 – 3.1)    |
|          | Northern  | Port Loko     | Any ORS           | 41.1 (34.8 – 47.6) | 68.4 (56 – 78.9)   | 80.4 (76.6 – 83.8) | 69.8 (62.7 – 76.2) |
|          | Northern  | Port Loko     | Only RHF          | 41.9 (34.9 – 49)   | 27.5 (17.9 – 40.1) | 18.2 (15 – 21.9)   | 28.3 (22 – 35.2)   |
|          | Northern  | Port Loko     | No ORT            | 17 (12.9 – 21.4)   | 4.1 (1.6 – 8.5)    | 1.3 (0.8 – 2.3)    | 1.9 (0.8 – 3.8)    |
|          | Northern  | Tonkolili     | Any ORS           | 40.2 (32.7 – 47.4) | 74.4 (64.5 – 82.8) | 86.5 (83.2 – 89.3) | 76.3 (70.4 – 81.7) |
|          | Northern  | Tonkolili     | Only RHF          | 45.7 (37.6 – 54.2) | 20.7 (12.6 – 30.6) | 12.1 (9.4 – 15.5)  | 22.3 (16.8 – 28.5) |
| Northern | Tonkolili | No ORT        | 14.1 (9.7 – 18.9) | 4.9 (1.9 – 9.4)    | 1.4 (0.8 – 2.2)    | 1.3 (0.6 – 2.6)    |                    |

| Southern and Eastern |          |          |                    |                    |                    |                    |  |
|----------------------|----------|----------|--------------------|--------------------|--------------------|--------------------|--|
| Eastern              | Kailahun | Any ORS  | 61.1 (51.1 – 69.7) | 61 (46.7 – 73.5)   | 83.8 (77.4 – 88.8) | 82.6 (75.1 – 88.3) |  |
| Eastern              | Kailahun | Only RHF | 31.6 (22.7 – 41.9) | 31.8 (19.5 – 45.8) | 13 (8.5 – 19.3)    | 15.7 (10.2 – 23.5) |  |
| Eastern              | Kailahun | No ORT   | 7.2 (4 – 11.5)     | 7.2 (2.7 – 15.1)   | 3.2 (1.5 – 6.1)    | 1.6 (0.6 – 3.6)    |  |
| Eastern              | Kenema   | Any ORS  | 60.4 (52.5 – 68.2) | 65.7 (52.6 – 76.2) | 86.7 (82 – 90.8)   | 86.5 (81.5 – 90.4) |  |
| Eastern              | Kenema   | Only RHF | 32 (23.9 – 40.4)   | 28 (17.4 – 41.2)   | 11.8 (7.9 – 16.6)  | 12.6 (8.9 – 17.6)  |  |
| Eastern              | Kenema   | No ORT   | 7.6 (4.7 – 11.4)   | 6.3 (2.5 – 12.5)   | 1.4 (0.7 – 2.6)    | 0.9 (0.4 – 1.8)    |  |
| Eastern              | Kono     | Any ORS  | 54.9 (46.2 – 63.5) | 64 (49.6 – 75.9)   | 88 (84.5 – 90.9)   | 77.6 (69.7 – 84)   |  |
| Eastern              | Kono     | Only RHF | 35.6 (26.8 – 45.2) | 30.6 (19.1 – 44.7) | 10 (7.1 – 13.6)    | 21.2 (14.9 – 29.2) |  |
| Eastern              | Kono     | No ORT   | 9.4 (5.8 – 14.2)   | 5.3 (2 – 11.1)     | 2 (1.1 – 3.4)      | 1.3 (0.5 – 2.8)    |  |
| Southern             | Bo       | Any ORS  | 60.9 (50.9 – 70.1) | 72.2 (60.2 – 81.9) | 89.6 (85.9 – 92.6) | 85.8 (80.6 – 90.3) |  |
| Southern             | Bo       | Only RHF | 30.3 (20.7 – 40.8) | 21.1 (12.5 – 32.7) | 8.8 (6 – 12.4)     | 13 (8.7 – 18.1)    |  |
| Southern             | Bo       | No ORT   | 8.8 (5.3 – 13.4)   | 6.7 (2.7 – 13.4)   | 1.6 (0.8 – 2.7)    | 1.2 (0.6 – 2.5)    |  |
| Southern             | Bonthe   | Any ORS  | 60.1 (47.7 – 72)   | 69.3 (55.4 – 80.8) | 89.5 (84 – 93.4)   | 85.7 (78 – 91.6)   |  |
| Southern             | Bonthe   | Only RHF | 30.9 (18.7 – 44.2) | 27.6 (16 – 42.1)   | 9.9 (6 – 15.4)     | 13.6 (7.7 – 21.1)  |  |
| Southern             | Bonthe   | No ORT   | 9 (4.2 – 15.5)     | 3.1 (1.1 – 7.1)    | 0.6 (0.2 – 1.4)    | 0.7 (0.2 – 1.8)    |  |
| Southern             | Moyamba  | Any ORS  | 55.5 (45.8 – 64.4) | 73.4 (62.5 – 82.8) | 86.4 (82.6 – 89.9) | 79.8 (72.1 – 85.9) |  |
| Southern             | Moyamba  | Only RHF | 32.4 (23.4 – 43)   | 22.1 (12.8 – 33.1) | 12.4 (9 – 16.2)    | 18.6 (12.5 – 26.4) |  |
| Southern             | Moyamba  | No ORT   | 12 (7.7 – 17.3)    | 4.5 (1.8 – 9.2)    | 1.1 (0.6 – 2)      | 1.5 (0.6 – 3.2)    |  |
| Southern             | Pujehun  | Any ORS  | 62.4 (50 – 74.3)   | 63.5 (49.2 – 77)   | 87.5 (82 – 91.9)   | 86.2 (80.4 – 91)   |  |
| Southern             | Pujehun  | Only RHF | 30.7 (19 – 44.6)   | 31.5 (17.9 – 46.1) | 11.1 (6.8 – 16.6)  | 12.3 (7.8 – 18)    |  |
| Southern             | Pujehun  | No ORT   | 6.9 (3.1 – 11.8)   | 5.1 (1.8 – 11.2)   | 1.4 (0.6 – 2.9)    | 1.5 (0.5 – 3.2)    |  |

635  
636

637 **b) Mali**

638 Coverage estimates by Region, Cercle, Treatment (Any ORS, Only RHF, and No ORT) for 2001, 2004, 2011, and 2018. Estimates are shown as  
 639 percentages in the format: mean (2.5%–97.5% uncertainty interval). Groups Bamako, Northern, and Southern correspond to regions shown in Figure  
 640 3.  
 641

| Group    | Region | Cercle   | Treatment | 2001               | 2004               | 2011               | 2018               |
|----------|--------|----------|-----------|--------------------|--------------------|--------------------|--------------------|
| Bamako   | Bamako | Bamako   | Any ORS   | 32.2 (25.6 – 38.7) | 25.3 (5.5 – 54.6)  | 27.8 (8.2 – 56)    | 25.6 (20 – 31.8)   |
|          | Bamako | Bamako   | Only RHF  | 38.3 (32 – 44.8)   | 65.2 (30.5 – 91)   | 61.9 (30 – 86.3)   | 73.6 (67.4 – 79.5) |
|          | Bamako | Bamako   | No ORT    | 29.4 (23.2 – 35.8) | 9.4 (0.9 – 30.2)   | 10.3 (0.9 – 29.7)  | 0.8 (0.2 – 2.2)    |
| Northern | Gao    | Ansongo  | Any ORS   | 9.2 (4.4 – 15.8)   | 15 (2.9 – 38.5)    | 17 (3.8 – 38.1)    | 33.5 (19.7 – 50)   |
|          | Gao    | Ansongo  | Only RHF  | 87.7 (80.5 – 93.1) | 75.4 (48.5 – 93.2) | 72.9 (45.6 – 91.6) | 59.4 (42 – 74.8)   |
|          | Gao    | Ansongo  | No ORT    | 3.1 (0.9 – 7.4)    | 9.5 (1.3 – 26.7)   | 10.1 (1.7 – 27.8)  | 7.2 (1.8 – 17.2)   |
|          | Gao    | Bourem   | Any ORS   | 10.3 (5 – 18.2)    | 13.4 (2.8 – 31.9)  | 14.6 (4 – 33)      | 35.7 (25 – 48)     |
|          | Gao    | Bourem   | Only RHF  | 85.9 (76 – 92.2)   | 78.4 (53.4 – 93.3) | 75.5 (52.5 – 91.9) | 60.2 (47.5 – 71.6) |
|          | Gao    | Bourem   | No ORT    | 3.8 (1 – 8.6)      | 8.3 (1.4 – 22.2)   | 9.9 (1.9 – 24.9)   | 4.1 (1.3 – 9.6)    |
|          | Gao    | Gao      | Any ORS   | 14.5 (7.2 – 24.8)  | 16.2 (2.9 – 40.6)  | 14.9 (3.1 – 35.8)  | 35.1 (24.3 – 47.1) |
|          | Gao    | Gao      | Only RHF  | 82.1 (71 – 90.2)   | 75 (44.8 – 93.5)   | 77.7 (51.9 – 93.7) | 59.9 (46.7 – 71.1) |
|          | Gao    | Gao      | No ORT    | 3.4 (0.8 – 8.6)    | 8.9 (1 – 29.3)     | 7.3 (0.9 – 22.1)   | 5.1 (1.5 – 11.7)   |
|          | Gao    | Ménaka   | Any ORS   | 12.1 (5.2 – 22.5)  | 13.4 (4.1 – 28.6)  | 17.4 (5.9 – 34.4)  | 19.5 (8 – 38.4)    |
|          | Gao    | Ménaka   | Only RHF  | 76.5 (62.1 – 87.4) | 77.5 (57.2 – 90.9) | 73.5 (51.5 – 89.5) | 75 (53.4 – 88.4)   |
|          | Gao    | Ménaka   | No ORT    | 11.4 (4.3 – 21.5)  | 9.1 (1.9 – 22.6)   | 9.1 (1.7 – 22.9)   | 5.5 (1 – 15.3)     |
|          | Kidal  | Abeïbara | Any ORS   | 8.6 (2.2 – 20.2)   | 11.3 (2.3 – 28.4)  | 9.5 (2.1 – 24.9)   | 13.8 (4 – 31)      |
|          | Kidal  | Abeïbara | Only RHF  | 85.5 (70 – 94.8)   | 80.1 (56.5 – 94)   | 83.4 (62.9 – 94.7) | 80.4 (60 – 92.8)   |
|          | Kidal  | Abeïbara | No ORT    | 5.9 (1.1 – 15.7)   | 8.6 (1.1 – 24.7)   | 7.2 (1.2 – 20.6)   | 5.7 (0.8 – 15.4)   |
|          | Kidal  | Kidal    | Any ORS   | 9.5 (3.9 – 18.1)   | 12.9 (2.8 – 31.4)  | 13 (2.7 – 33.1)    | 16.8 (8.5 – 27.4)  |
|          | Kidal  | Kidal    | Only RHF  | 86.2 (75.6 – 93.2) | 79 (53.8 – 93.7)   | 78.9 (54.1 – 93.9) | 76.7 (63.7 – 87.2) |
|          | Kidal  | Kidal    | No ORT    | 4.3 (1.1 – 9.9)    | 8 (1 – 23.7)       | 8.1 (1.1 – 22.5)   | 6.6 (1.9 – 13.9)   |
|          | Kidal  | Tessalit | Any ORS   | 8.1 (2.7 – 16.7)   | 11.1 (2.8 – 27)    | 10.6 (2.6 – 25.3)  | 15.2 (5.1 – 31.6)  |
|          | Kidal  | Tessalit | Only RHF  | 86.9 (74.8 – 94)   | 80.8 (59.4 – 93.6) | 82.3 (63.1 – 94)   | 79.3 (59.8 – 92.2) |
|          | Kidal  | Tessalit | No ORT    | 5 (1.1 – 12.2)     | 8.1 (1.4 – 22)     | 7.1 (1.4 – 18.4)   | 5.6 (1 – 16.4)     |

|          |            |          |                    |                    |                    |                    |
|----------|------------|----------|--------------------|--------------------|--------------------|--------------------|
| Kidal    | Tin-Essako | Any ORS  | 9.6 (2.8 – 21.2)   | 12.3 (2.6 – 30.6)  | 11.8 (2.4 – 30.1)  | 14.8 (4.7 – 32)    |
| Kidal    | Tin-Essako | Only RHF | 84.7 (69.7 – 94.1) | 79.5 (55.7 – 93.8) | 80.7 (58.4 – 94)   | 79.4 (59.7 – 92.5) |
| Kidal    | Tin-Essako | No ORT   | 5.8 (1 – 15)       | 8.1 (1.2 – 24.5)   | 7.4 (1 – 21.5)     | 5.8 (0.9 – 15.7)   |
| Mopti    | Bandiagara | Any ORS  | 6.7 (3.1 – 11.4)   | 15.6 (3.2 – 39.1)  | 17.5 (4.6 – 38.2)  | 32.5 (22.3 – 43)   |
| Mopti    | Bandiagara | Only RHF | 87.4 (80.2 – 92.7) | 74.5 (46 – 92.7)   | 74.6 (47.1 – 91.8) | 63 (51.9 – 73.6)   |
| Mopti    | Bandiagara | No ORT   | 6 (2.5 – 11)       | 9.9 (1.1 – 28.3)   | 7.9 (1.1 – 23.7)   | 4.5 (1.5 – 9.5)    |
| Mopti    | Bankass    | Any ORS  | 6.4 (2.9 – 11.5)   | 15.1 (2.9 – 37.7)  | 16.7 (3.8 – 40.9)  | 25.9 (17.2 – 37.1) |
| Mopti    | Bankass    | Only RHF | 82 (73 – 89.3)     | 74.5 (45.4 – 92.8) | 75.7 (44.9 – 92.7) | 70.4 (59.2 – 80.2) |
| Mopti    | Bankass    | No ORT   | 11.6 (6.3 – 18.8)  | 10.4 (1.3 – 30.8)  | 7.6 (0.8 – 23.5)   | 3.6 (1.2 – 8.1)    |
| Mopti    | Djenné     | Any ORS  | 5.7 (2.3 – 11)     | 14.3 (2.7 – 37.3)  | 15.1 (3 – 36.5)    | 18.5 (10.1 – 29.8) |
| Mopti    | Djenné     | Only RHF | 89.4 (81.6 – 94.3) | 75.3 (46 – 92.7)   | 72.2 (42.7 – 91.3) | 78.6 (66 – 87.6)   |
| Mopti    | Djenné     | No ORT   | 4.9 (1.9 – 9.5)    | 10.4 (1.2 – 30.8)  | 12.7 (2 – 33.9)    | 3 (0.7 – 8.1)      |
| Mopti    | Douentza   | Any ORS  | 4.8 (2.1 – 8.6)    | 13.2 (2.9 – 31.8)  | 17.4 (5.8 – 34.6)  | 27.4 (14.2 – 43.9) |
| Mopti    | Douentza   | Only RHF | 91.2 (85.7 – 95.4) | 77.3 (53.2 – 92.7) | 76 (52.6 – 91)     | 68.4 (49.7 – 83)   |
| Mopti    | Douentza   | No ORT   | 4.1 (1.6 – 7.9)    | 9.5 (1.6 – 25.7)   | 6.6 (1.1 – 18)     | 4.2 (0.9 – 11.6)   |
| Mopti    | Koro       | Any ORS  | 6.4 (2.7 – 11.7)   | 14.9 (3.2 – 38.4)  | 17 (4.3 – 38.7)    | 32.2 (20.6 – 45.3) |
| Mopti    | Koro       | Only RHF | 86.7 (78.7 – 92.2) | 75.4 (48 – 93.2)   | 77.7 (52.5 – 93.1) | 63.1 (48.8 – 75.5) |
| Mopti    | Koro       | No ORT   | 7 (3.2 – 12.9)     | 9.7 (1.3 – 27.1)   | 5.3 (0.7 – 17.2)   | 4.7 (1.4 – 10.8)   |
| Mopti    | Mopti      | Any ORS  | 5.1 (2.6 – 8.8)    | 15.3 (3.4 – 37.1)  | 18.9 (5.4 – 44.3)  | 34.4 (23.1 – 46.4) |
| Mopti    | Mopti      | Only RHF | 89.8 (84.6 – 93.7) | 75.4 (47.9 – 92.4) | 68.2 (41 – 88.1)   | 61.1 (49.2 – 73.1) |
| Mopti    | Mopti      | No ORT   | 5.1 (2.5 – 8.8)    | 9.3 (1.1 – 27.5)   | 13 (2.4 – 33.6)    | 4.5 (1.4 – 10.4)   |
| Mopti    | Téniengkou | Any ORS  | 4.4 (2.1 – 7.8)    | 14.2 (2.5 – 35)    | 19 (5.4 – 42)      | 29.1 (15.7 – 46.4) |
| Mopti    | Téniengkou | Only RHF | 91.1 (86.1 – 94.5) | 76.1 (48.1 – 92.7) | 69 (41.5 – 89.5)   | 66 (47 – 81.2)     |
| Mopti    | Téniengkou | No ORT   | 4.5 (2.3 – 8)      | 9.7 (1.2 – 30.2)   | 12.1 (1.8 – 30.9)  | 4.9 (1 – 13)       |
| Mopti    | Youwarou   | Any ORS  | 3.4 (1.4 – 6.6)    | 12.1 (2.3 – 32.1)  | 20 (5.4 – 45.7)    | 27.9 (16.3 – 40.9) |
| Mopti    | Youwarou   | Only RHF | 92.8 (88.3 – 95.9) | 79.5 (53.8 – 94.7) | 70 (38.4 – 90.1)   | 69.3 (55.2 – 81.4) |
| Mopti    | Youwarou   | No ORT   | 3.8 (1.7 – 6.7)    | 8.4 (0.9 – 27.4)   | 10 (1.4 – 28.4)    | 2.8 (0.7 – 8)      |
| Timbuktu | Diré       | Any ORS  | 3.4 (1.1 – 7.6)    | 13.5 (2.2 – 37.3)  | 19.2 (4.8 – 44)    | 21.6 (14.1 – 30.5) |
| Timbuktu | Diré       | Only RHF | 93.7 (87.6 – 97.2) | 77.6 (45.1 – 95.2) | 74.3 (44.6 – 93.2) | 76 (66.7 – 84.1)   |

|                 |          |                |          |                    |                    |                    |                    |
|-----------------|----------|----------------|----------|--------------------|--------------------|--------------------|--------------------|
|                 | Timbuktu | Diré           | No ORT   | 2.8 (0.7 – 6.8)    | 8.9 (0.8 – 27.1)   | 6.5 (0.6 – 22.8)   | 2.4 (0.7 – 5.8)    |
|                 | Timbuktu | Goundam        | Any ORS  | 3.5 (1.2 – 6.9)    | 12.6 (2.8 – 33.2)  | 17.3 (5.2 – 38.6)  | 19.7 (12.9 – 28.1) |
|                 | Timbuktu | Goundam        | Only RHF | 93.9 (88.7 – 97.1) | 79 (52.2 – 93.5)   | 76.2 (51.7 – 92.2) | 78 (69.1 – 85.1)   |
|                 | Timbuktu | Goundam        | No ORT   | 2.6 (0.9 – 6)      | 8.4 (1.2 – 23.9)   | 6.4 (0.9 – 19.6)   | 2.4 (0.8 – 5.7)    |
|                 | Timbuktu | Gourma-Rharous | Any ORS  | 5.7 (2.4 – 10.9)   | 13.1 (3.6 – 30.5)  | 14.4 (4.3 – 30.8)  | 29 (17.8 – 42.8)   |
|                 | Timbuktu | Gourma-Rharous | Only RHF | 90.8 (84.1 – 95.3) | 77.8 (56.3 – 91.8) | 78.3 (57.5 – 91.9) | 67.2 (52.3 – 79.2) |
|                 | Timbuktu | Gourma-Rharous | No ORT   | 3.4 (1.1 – 7.3)    | 9.1 (1.8 – 23.2)   | 7.3 (1.3 – 19.6)   | 3.8 (1 – 8.9)      |
|                 | Timbuktu | Niafunké       | Any ORS  | 3.3 (1.2 – 6.4)    | 12.4 (2.6 – 31.7)  | 19.4 (5.8 – 43.4)  | 23.4 (16.4 – 30.9) |
|                 | Timbuktu | Niafunké       | Only RHF | 92.9 (88.4 – 96.3) | 78.6 (54 – 93.6)   | 72.6 (45.7 – 90.1) | 74.4 (66.5 – 81.7) |
|                 | Timbuktu | Niafunké       | No ORT   | 3.8 (1.6 – 6.9)    | 9.1 (1.2 – 26.3)   | 8 (1.1 – 22.6)     | 2.2 (0.7 – 4.9)    |
|                 | Timbuktu | Tombouctou     | Any ORS  | 4.8 (2 – 9.7)      | 13.9 (3.2 – 33.8)  | 14 (4.1 – 31.6)    | 22.7 (14.6 – 31.9) |
|                 | Timbuktu | Tombouctou     | Only RHF | 92.3 (86.2 – 96.3) | 77.4 (51.9 – 92.7) | 80.4 (58.8 – 93.7) | 73.5 (63.1 – 81.7) |
|                 | Timbuktu | Tombouctou     | No ORT   | 2.8 (0.8 – 6.6)    | 8.7 (1.4 – 25)     | 5.6 (1 – 17.5)     | 3.8 (1.3 – 7.9)    |
| <b>Southern</b> | Kayes    | Bafoulabé      | Any ORS  | 10.8 (6.3 – 17)    | 15.9 (3.5 – 35.8)  | 18.7 (5.1 – 39.3)  | 16.9 (9.7 – 26)    |
|                 | Kayes    | Bafoulabé      | Only RHF | 44.4 (34.9 – 53.8) | 73.9 (49.1 – 91.4) | 72.2 (47.6 – 89.1) | 81.9 (72.1 – 89.6) |
|                 | Kayes    | Bafoulabé      | No ORT   | 44.8 (35.8 – 54)   | 10.1 (1.6 – 26.8)  | 9 (1.5 – 24.3)     | 1.2 (0.2 – 3.5)    |
|                 | Kayes    | Diéma          | Any ORS  | 6.9 (3.7 – 11.9)   | 15.3 (3.3 – 36.3)  | 17 (4.3 – 39.1)    | 7.5 (4.1 – 12.1)   |
|                 | Kayes    | Diéma          | Only RHF | 66.2 (58 – 74.8)   | 75.1 (50.7 – 92.1) | 76 (50.9 – 91.7)   | 91.4 (86.3 – 95.1) |
|                 | Kayes    | Diéma          | No ORT   | 26.9 (19.5 – 34.7) | 9.6 (1.4 – 26.9)   | 7 (0.8 – 21.5)     | 1.2 (0.2 – 3.2)    |
|                 | Kayes    | Kayes          | Any ORS  | 24.2 (15.6 – 33.4) | 17.3 (3.9 – 40.5)  | 19.4 (5.7 – 40.4)  | 17.1 (9 – 27.6)    |
|                 | Kayes    | Kayes          | Only RHF | 48.7 (38 – 60.7)   | 74.2 (46.4 – 91.6) | 73.8 (49.1 – 91.7) | 81.3 (70.1 – 89.7) |
|                 | Kayes    | Kayes          | No ORT   | 27.1 (18 – 36.5)   | 8.5 (1.2 – 23.5)   | 6.7 (0.9 – 20.2)   | 1.6 (0.3 – 5.5)    |
|                 | Kayes    | Kita           | Any ORS  | 6.2 (3.2 – 11)     | 17 (4.6 – 36.9)    | 19.5 (5.6 – 39.3)  | 17.5 (11.7 – 25.1) |
|                 | Kayes    | Kita           | Only RHF | 62.2 (52.7 – 70.9) | 72.7 (47.1 – 91.1) | 71.8 (46.2 – 88.6) | 81.3 (73.6 – 87.4) |
|                 | Kayes    | Kita           | No ORT   | 31.6 (23.3 – 40.5) | 10.3 (1.8 – 26.7)  | 8.6 (1.6 – 22.9)   | 1.3 (0.3 – 3.6)    |
|                 | Kayes    | Kéniéba        | Any ORS  | 10.5 (4.6 – 19.1)  | 16 (3.2 – 39.8)    | 18.4 (4.9 – 39.5)  | 18.8 (11.3 – 29.5) |
|                 | Kayes    | Kéniéba        | Only RHF | 62 (49.2 – 73.7)   | 73.2 (44.7 – 91.2) | 69.8 (42.4 – 89.4) | 79.6 (68.6 – 87.5) |
|                 | Kayes    | Kéniéba        | No ORT   | 27.5 (17.2 – 39.4) | 10.8 (1.5 – 29.8)  | 11.8 (2 – 30.9)    | 1.6 (0.3 – 4.5)    |
|                 | Kayes    | Nioro          | Any ORS  | 9.8 (4.9 – 16.4)   | 14.7 (3.4 – 35.5)  | 18.7 (5 – 40.3)    | 5.4 (2.5 – 10.2)   |

|           |           |          |                    |                    |                    |                    |
|-----------|-----------|----------|--------------------|--------------------|--------------------|--------------------|
| Kayes     | Nioro     | Only RHF | 76.3 (67.2 – 83.7) | 76.5 (51.3 – 92.8) | 74.6 (45.5 – 92.2) | 93.4 (87.8 – 96.7) |
| Kayes     | Nioro     | No ORT   | 13.9 (8.2 – 21.2)  | 8.8 (1.1 – 25)     | 6.7 (0.7 – 21.3)   | 1.3 (0.2 – 3.5)    |
| Kayes     | Yélimané  | Any ORS  | 18.4 (10.5 – 27.7) | 15 (2.9 – 38.8)    | 18.8 (4.5 – 41.9)  | 8.2 (3.6 – 15.1)   |
| Kayes     | Yélimané  | Only RHF | 70.4 (59.1 – 79.9) | 76.9 (50.1 – 93.3) | 75 (47.1 – 92.2)   | 90.7 (83 – 95.7)   |
| Kayes     | Yélimané  | No ORT   | 11.1 (5.6 – 20.2)  | 8.1 (1 – 24)       | 6.3 (0.8 – 20.9)   | 1.1 (0.2 – 3.3)    |
| Koulikoro | Banamba   | Any ORS  | 9.3 (5.3 – 14.9)   | 15.8 (3.4 – 38.7)  | 17.1 (4.1 – 39.8)  | 18.4 (9.5 – 31)    |
| Koulikoro | Banamba   | Only RHF | 48.5 (38.6 – 59.4) | 73.9 (46 – 92.3)   | 75 (48.6 – 92.6)   | 78 (63.9 – 87.5)   |
| Koulikoro | Banamba   | No ORT   | 42.1 (32.8 – 52.4) | 10.3 (1.1 – 29.7)  | 7.8 (1 – 23.1)     | 3.6 (0.9 – 9.6)    |
| Koulikoro | Dioïla    | Any ORS  | 17.7 (11 – 25.5)   | 16.1 (3.6 – 37.7)  | 19.5 (5.2 – 43.7)  | 18.4 (11.8 – 26.8) |
| Koulikoro | Dioïla    | Only RHF | 60 (50.2 – 69.4)   | 74.2 (46.2 – 91.8) | 71.9 (45 – 91.7)   | 78.2 (68.5 – 85.7) |
| Koulikoro | Dioïla    | No ORT   | 22.3 (15.1 – 30.6) | 9.7 (1.2 – 27.5)   | 8.6 (1.3 – 23.7)   | 3.5 (1.1 – 8)      |
| Koulikoro | Kangaba   | Any ORS  | 8.6 (4.4 – 14.8)   | 18.1 (4.2 – 42.8)  | 23.6 (6 – 49.2)    | 23.6 (12.3 – 38)   |
| Koulikoro | Kangaba   | Only RHF | 80.8 (71.3 – 87.9) | 72 (41.5 – 92.1)   | 65.2 (35.5 – 88.7) | 73 (57.3 – 85.4)   |
| Koulikoro | Kangaba   | No ORT   | 10.6 (5.5 – 17.6)  | 9.9 (1 – 30.5)     | 11.2 (1.6 – 29.6)  | 3.4 (0.6 – 9)      |
| Koulikoro | Kati      | Any ORS  | 22.3 (16.7 – 27.6) | 20.9 (5.1 – 45.9)  | 23.7 (7.2 – 48.4)  | 23.3 (18.7 – 28.3) |
| Koulikoro | Kati      | Only RHF | 51.1 (44.9 – 57.2) | 69.3 (38.3 – 90.8) | 65.9 (36.1 – 87.3) | 75.8 (70.7 – 80.4) |
| Koulikoro | Kati      | No ORT   | 26.6 (20.9 – 32.3) | 9.8 (1.3 – 29.6)   | 10.5 (1.3 – 28.1)  | 1 (0.3 – 2.4)      |
| Koulikoro | Kolokani  | Any ORS  | 13.2 (7.8 – 19.3)  | 17.5 (3.6 – 40.1)  | 17.5 (4.2 – 39.1)  | 16.2 (9.1 – 27.2)  |
| Koulikoro | Kolokani  | Only RHF | 60.3 (51.1 – 69.6) | 72.3 (46 – 91.3)   | 73.2 (46.8 – 90.6) | 82.2 (71 – 89.9)   |
| Koulikoro | Kolokani  | No ORT   | 26.5 (19.3 – 34.5) | 10.2 (1.5 – 30)    | 9.3 (1.4 – 26.2)   | 1.5 (0.3 – 4.6)    |
| Koulikoro | Koulikoro | Any ORS  | 16.1 (10.4 – 23)   | 17.2 (3.6 – 39.8)  | 19 (5.5 – 43.5)    | 19.9 (12.2 – 29.5) |
| Koulikoro | Koulikoro | Only RHF | 40.7 (32.2 – 50.4) | 72.8 (43.9 – 92.3) | 73.8 (46.1 – 91.2) | 77.2 (67 – 85.3)   |
| Koulikoro | Koulikoro | No ORT   | 43.3 (34.9 – 52.3) | 10 (1.3 – 29.7)    | 7.2 (0.9 – 21.2)   | 2.9 (0.8 – 7)      |
| Koulikoro | Nara      | Any ORS  | 7 (3 – 12.3)       | 13.5 (3.4 – 32.4)  | 14.4 (3.8 – 31.8)  | 11 (5 – 20.1)      |
| Koulikoro | Nara      | Only RHF | 81.4 (72.5 – 88.4) | 77.5 (54.2 – 92.4) | 76.5 (55.2 – 91.8) | 84.8 (73.8 – 92.3) |
| Koulikoro | Nara      | No ORT   | 11.6 (6.4 – 18.8)  | 9 (1.5 – 25.1)     | 9 (1.7 – 23.1)     | 4.2 (1.1 – 10.4)   |
| Sikasso   | Bougouni  | Any ORS  | 13.7 (8.6 – 19.8)  | 16.5 (4.1 – 36.8)  | 21.4 (6.6 – 43.6)  | 24.4 (14.5 – 36.1) |
| Sikasso   | Bougouni  | Only RHF | 72.2 (63.6 – 79.3) | 73.9 (47.4 – 90.8) | 64.7 (40.1 – 85.9) | 73.5 (60.4 – 83.7) |
| Sikasso   | Bougouni  | No ORT   | 14.1 (8.8 – 20.6)  | 9.6 (1.4 – 26.9)   | 13.9 (3.2 – 32.3)  | 2.1 (0.4 – 6.1)    |



|         |            |          |                    |                    |                    |                    |
|---------|------------|----------|--------------------|--------------------|--------------------|--------------------|
| Sikasso | Kadiolo    | Any ORS  | 27.4 (19.3 – 36.6) | 17.8 (3.3 – 43.8)  | 17.2 (4 – 39.4)    | 23.8 (11.6 – 39.3) |
| Sikasso | Kadiolo    | Only RHF | 59.7 (49.9 – 69.4) | 72.2 (39.7 – 91.7) | 70.4 (42.5 – 90.4) | 74 (57.7 – 87.2)   |
| Sikasso | Kadiolo    | No ORT   | 13 (7.4 – 19.6)    | 10.1 (1 – 30.2)    | 12.3 (2.1 – 33.8)  | 2.2 (0.3 – 8.1)    |
| Sikasso | Kolondiéba | Any ORS  | 19 (11.9 – 28.7)   | 15.7 (3.1 – 38.8)  | 20.3 (5.1 – 43.8)  | 27.3 (15.8 – 41.9) |
| Sikasso | Kolondiéba | Only RHF | 67.7 (56.6 – 77)   | 75.4 (46.7 – 93)   | 66.5 (38.1 – 88.5) | 70.6 (55.4 – 83.1) |
| Sikasso | Kolondiéba | No ORT   | 13.3 (7.4 – 20.8)  | 9 (1 – 27.4)       | 13.2 (2.4 – 33.9)  | 2.1 (0.3 – 7.1)    |
| Sikasso | Koutiala   | Any ORS  | 18.2 (11.6 – 26.3) | 17.2 (3.3 – 42.2)  | 19.6 (4.6 – 44.3)  | 28.9 (18.8 – 40.3) |
| Sikasso | Koutiala   | Only RHF | 70.2 (60.5 – 78.8) | 73 (43.6 – 92)     | 68.1 (39.6 – 88.8) | 63.1 (50.7 – 73.6) |
| Sikasso | Koutiala   | No ORT   | 11.7 (6.5 – 18.6)  | 9.8 (1.1 – 28)     | 12.4 (2.1 – 32.1)  | 8 (3.4 – 15.7)     |
| Sikasso | Sikasso    | Any ORS  | 16.7 (10.4 – 24.5) | 17.2 (3.8 – 42.6)  | 20.2 (5.4 – 43.5)  | 20.9 (13.2 – 31.8) |
| Sikasso | Sikasso    | Only RHF | 72.4 (63.3 – 79.9) | 72.8 (45 – 91.7)   | 63.2 (34 – 85.6)   | 77.2 (66.3 – 85.6) |
| Sikasso | Sikasso    | No ORT   | 10.9 (6.3 – 16.9)  | 10 (1.2 – 29.9)    | 16.6 (3.4 – 40.4)  | 1.9 (0.4 – 5)      |
| Sikasso | Yanfolila  | Any ORS  | 7.6 (3.5 – 13.7)   | 17.2 (4.1 – 38.8)  | 24.7 (7.4 – 49.7)  | 24 (11.4 – 39.4)   |
| Sikasso | Yanfolila  | Only RHF | 85.9 (76.7 – 91.9) | 72.7 (43.4 – 91.6) | 61.6 (32.9 – 85)   | 72.8 (55.4 – 86.3) |
| Sikasso | Yanfolila  | No ORT   | 6.5 (2.8 – 11.6)   | 10.1 (1.2 – 30)    | 13.7 (2.5 – 35)    | 3.2 (0.5 – 9.4)    |
| Sikasso | Yorosso    | Any ORS  | 13.5 (7.3 – 22.4)  | 16.8 (3.1 – 43.4)  | 19.6 (4.7 – 47.1)  | 26.7 (15.7 – 39.6) |
| Sikasso | Yorosso    | Only RHF | 80.5 (70.4 – 88.2) | 73 (42.1 – 92.8)   | 63.9 (33.2 – 87.7) | 70.6 (57.1 – 82.5) |
| Sikasso | Yorosso    | No ORT   | 6 (2.2 – 11.7)     | 10.2 (0.9 – 31.4)  | 16.5 (3.1 – 40.6)  | 2.7 (0.6 – 7.5)    |
| Ségou   | Barouéli   | Any ORS  | 16 (9.5 – 23.9)    | 15.2 (3 – 37.3)    | 20.8 (5.6 – 45.5)  | 19.6 (11.9 – 28.6) |
| Ségou   | Barouéli   | Only RHF | 55.9 (45.1 – 66.3) | 75.1 (46.5 – 93.4) | 72.2 (43.8 – 91.3) | 67.5 (55.8 – 76.9) |
| Ségou   | Barouéli   | No ORT   | 28.1 (19.9 – 37.4) | 9.7 (0.9 – 30.8)   | 7 (1 – 21.5)       | 12.9 (6.8 – 20.8)  |
| Ségou   | Bla        | Any ORS  | 21.5 (13.2 – 31.8) | 15.7 (3.3 – 38.3)  | 16.9 (3.8 – 39.4)  | 25.2 (16.9 – 33.5) |
| Ségou   | Bla        | Only RHF | 66.6 (54.4 – 76.4) | 74.4 (48.3 – 92.7) | 73.7 (44.5 – 91.4) | 55.3 (46.7 – 64.7) |
| Ségou   | Bla        | No ORT   | 12 (5.8 – 20.1)    | 9.9 (1 – 28.5)     | 9.4 (1.6 – 25.7)   | 19.4 (12.8 – 28.2) |
| Ségou   | Macina     | Any ORS  | 10.7 (5.4 – 18.3)  | 15.2 (3.1 – 38.9)  | 17.7 (4 – 40.4)    | 20.8 (11.9 – 32)   |
| Ségou   | Macina     | Only RHF | 81.4 (71.6 – 88.8) | 74.8 (45 – 92.8)   | 71.7 (44.4 – 91.1) | 72.6 (59.7 – 83.5) |
| Ségou   | Macina     | No ORT   | 7.9 (3.4 – 14.2)   | 10 (1.2 – 29)      | 10.6 (1.7 – 29.9)  | 6.6 (2.4 – 14)     |
| Ségou   | Niono      | Any ORS  | 9.8 (4.4 – 17.9)   | 15.9 (3.1 – 41.6)  | 21.6 (6.1 – 46.1)  | 35.2 (22.3 – 49.8) |
| Ségou   | Niono      | Only RHF | 78.1 (67.2 – 87.1) | 75 (44.1 – 92.4)   | 71.1 (43.9 – 90.5) | 55.6 (40.1 – 69.8) |

|       |          |          |                    |                    |                    |                    |
|-------|----------|----------|--------------------|--------------------|--------------------|--------------------|
| Ségou | Niono    | No ORT   | 12.1 (5.8 – 21)    | 9.1 (1 – 29.1)     | 7.2 (0.9 – 22.3)   | 9.2 (3.3 – 18.6)   |
| Ségou | San      | Any ORS  | 13.6 (7.9 – 20.6)  | 15.9 (3.1 – 39.9)  | 16 (3.3 – 36.9)    | 16.2 (10.3 – 23.7) |
| Ségou | San      | Only RHF | 80.9 (72.8 – 87.5) | 74 (45.8 – 92.9)   | 73.3 (46.3 – 91.1) | 80.9 (73 – 87.3)   |
| Ségou | San      | No ORT   | 5.5 (2.4 – 9.9)    | 10.1 (1 – 29.9)    | 10.8 (1.8 – 28.5)  | 2.8 (1 – 6.3)      |
| Ségou | Ségou    | Any ORS  | 17.2 (9.8 – 27.3)  | 16 (3.5 – 38)      | 20.5 (5.7 – 45.3)  | 21.7 (15.4 – 29.3) |
| Ségou | Ségou    | Only RHF | 70.4 (56.9 – 80.1) | 74.1 (46.3 – 92.4) | 70.7 (42.2 – 90.7) | 56.1 (48.3 – 64.5) |
| Ségou | Ségou    | No ORT   | 12.4 (6.2 – 20.7)  | 9.9 (0.9 – 31.2)   | 8.8 (1.3 – 25.6)   | 22.1 (15.3 – 29.1) |
| Ségou | Tominian | Any ORS  | 7.8 (4.1 – 13.9)   | 14.5 (3.1 – 35.8)  | 15.5 (3.4 – 36.8)  | 15 (9 – 23.2)      |
| Ségou | Tominian | Only RHF | 88.3 (81.1 – 93)   | 75.6 (50.1 – 92.6) | 73.4 (45.6 – 91)   | 83 (74.5 – 89.6)   |
| Ségou | Tominian | No ORT   | 4 (1.6 – 7.5)      | 9.9 (1.2 – 29)     | 11 (1.7 – 28.8)    | 2 (0.6 – 4.7)      |

642  
643

644 **c) Senegal**

645 Coverage estimates by Region, Department, Treatment (Any ORS, Only RHF, and No ORT) for 2000, 2006, 2012, and 2017. Estimates are shown as  
 646 percentages in the format: mean (2.5%–97.5% uncertainty interval). Groups Northern, Central, and Southern correspond to regions shown in Figure 4.  
 647

| Group    | Region      | Department    | Treatment | 2000               | 2006               | 2012               | 2017               |
|----------|-------------|---------------|-----------|--------------------|--------------------|--------------------|--------------------|
| Northern | Louga       | Kébémér       | Any ORS   | 11 (7.4 – 15.5)    | 22.2 (15.8 – 28.9) | 24.1 (18.1 – 31.6) | 24.4 (19.1 – 30.2) |
|          | Louga       | Kébémér       | Only RHF  | 59.2 (52.2 – 65.7) | 71.6 (63.6 – 78.9) | 72.2 (64.3 – 79)   | 73.2 (67 – 78.9)   |
|          | Louga       | Kébémér       | No ORT    | 29.8 (24.1 – 36)   | 6.2 (3.2 – 10.5)   | 3.7 (2 – 6.1)      | 2.3 (1.3 – 3.8)    |
|          | Louga       | Linguère      | Any ORS   | 10.3 (6.8 – 14.3)  | 18.8 (13.6 – 24.9) | 19.7 (14.6 – 25.6) | 23.6 (19 – 28.9)   |
|          | Louga       | Linguère      | Only RHF  | 62.9 (56.3 – 69.4) | 75.7 (68.8 – 81.4) | 77.1 (70.5 – 83)   | 74.3 (68.6 – 79.4) |
|          | Louga       | Linguère      | No ORT    | 26.8 (21.2 – 32.9) | 5.6 (3.1 – 9)      | 3.2 (1.7 – 5.2)    | 2.1 (1.2 – 3.6)    |
|          | Louga       | Louga         | Any ORS   | 11.3 (7.4 – 15.9)  | 21.8 (15.6 – 28.7) | 23.9 (17.7 – 31)   | 25.4 (19.9 – 31.1) |
|          | Louga       | Louga         | Only RHF  | 62.4 (55.3 – 69)   | 72.1 (64.4 – 79.6) | 72.5 (64.5 – 79.5) | 72.5 (66.5 – 78.2) |
|          | Louga       | Louga         | No ORT    | 26.4 (20.3 – 32.4) | 6.1 (3.1 – 10.3)   | 3.6 (1.8 – 6)      | 2.1 (1.1 – 3.5)    |
|          | Matam       | Kanel         | Any ORS   | 12 (7.6 – 17.7)    | 22.5 (16.5 – 29.1) | 22.3 (16.4 – 29)   | 27.8 (22.1 – 33.8) |
|          | Matam       | Kanel         | Only RHF  | 56.8 (48.8 – 64.2) | 71.4 (64.2 – 78.1) | 74.8 (68 – 81.3)   | 70.5 (64.1 – 76.4) |
|          | Matam       | Kanel         | No ORT    | 31.2 (24.5 – 38.7) | 6.1 (3.4 – 10.2)   | 3 (1.6 – 5.2)      | 1.7 (0.9 – 2.8)    |
|          | Matam       | Matam         | Any ORS   | 11.5 (7.1 – 16.7)  | 23.1 (16.8 – 30.3) | 22 (16.3 – 28.6)   | 28 (22.1 – 34.3)   |
|          | Matam       | Matam         | Only RHF  | 60.1 (52.2 – 67.7) | 71.9 (63.9 – 79.4) | 75.2 (68.1 – 81.7) | 70.2 (63.6 – 76.6) |
|          | Matam       | Matam         | No ORT    | 28.4 (21.4 – 35.4) | 5 (2.6 – 8.6)      | 2.8 (1.4 – 4.8)    | 1.7 (0.9 – 2.9)    |
|          | Matam       | Ranérou Ferlo | Any ORS   | 11.4 (7.5 – 16.3)  | 19 (13.9 – 24.4)   | 20.2 (15.5 – 26.1) | 24.9 (20 – 30.5)   |
|          | Matam       | Ranérou Ferlo | Only RHF  | 58.4 (51.3 – 65.6) | 75.5 (68.5 – 81.6) | 76.8 (70.5 – 81.9) | 73.2 (67.2 – 78.7) |
|          | Matam       | Ranérou Ferlo | No ORT    | 30.2 (23.4 – 37.2) | 5.4 (3 – 8.5)      | 3 (1.6 – 4.9)      | 1.9 (1 – 3)        |
|          | Saint-Louis | Dagana        | Any ORS   | 11 (6.9 – 16)      | 21.9 (15.9 – 28.4) | 24.7 (18.6 – 31.8) | 27.8 (21.5 – 34.5) |
|          | Saint-Louis | Dagana        | Only RHF  | 61.2 (53.8 – 68.4) | 72.3 (64.7 – 78.6) | 71.8 (63.7 – 78.7) | 70.3 (63.2 – 77)   |
|          | Saint-Louis | Dagana        | No ORT    | 27.7 (21.6 – 34.2) | 5.8 (3.3 – 9.2)    | 3.5 (1.9 – 5.6)    | 1.9 (1 – 3.3)      |
|          | Saint-Louis | Podor         | Any ORS   | 10.8 (7.3 – 15.4)  | 20.6 (15.2 – 26.7) | 22.1 (16.8 – 28.4) | 26.7 (21.4 – 32.5) |
|          | Saint-Louis | Podor         | Only RHF  | 61.5 (54.5 – 67.7) | 74.2 (66.8 – 80.1) | 75 (68.2 – 80.8)   | 71.5 (65.3 – 77.1) |
|          | Saint-Louis | Podor         | No ORT    | 27.6 (21.7 – 34)   | 5.2 (3 – 8.6)      | 3 (1.7 – 4.7)      | 1.8 (1 – 3)        |
|          | Saint-Louis | Saint-Louis   | Any ORS   | 11.7 (6.8 – 18)    | 22.6 (15 – 31.1)   | 24.6 (16.7 – 33.4) | 27.1 (19.7 – 35.2) |

|                |             |             |                    |                    |                    |                    |                    |
|----------------|-------------|-------------|--------------------|--------------------|--------------------|--------------------|--------------------|
|                | Saint-Louis | Saint-Louis | Only RHF           | 61.7 (52 – 71.1)   | 71.7 (61.4 – 80.2) | 71.5 (61.6 – 80.2) | 70.9 (61.9 – 78.4) |
|                | Saint-Louis | Saint-Louis | No ORT             | 26.5 (18.9 – 34.9) | 5.7 (2.8 – 10.1)   | 3.9 (1.9 – 7.3)    | 2 (1 – 3.6)        |
| <b>Central</b> | Dakar       | Dakar       | Any ORS            | 14.8 (8.2 – 23.3)  | 24 (14.9 – 33.7)   | 24.9 (15.8 – 35.8) | 29.1 (20.2 – 39.2) |
|                | Dakar       | Dakar       | Only RHF           | 47.3 (34.5 – 59.7) | 68.4 (56.6 – 79.5) | 70.8 (58.4 – 81.1) | 67.8 (56.9 – 77.5) |
|                | Dakar       | Dakar       | No ORT             | 38 (26.9 – 50.6)   | 7.6 (3.5 – 13.5)   | 4.3 (1.9 – 8.5)    | 3.1 (1.5 – 5.5)    |
|                | Dakar       | Guédiawaye  | Any ORS            | 13.2 (6.1 – 21.9)  | 22.4 (13.3 – 33.1) | 23 (13.8 – 34.7)   | 28.9 (18 – 42.6)   |
|                | Dakar       | Guédiawaye  | Only RHF           | 48 (34.7 – 63)     | 69.2 (56 – 80.9)   | 72 (58.1 – 83)     | 66.9 (52.1 – 78.7) |
|                | Dakar       | Guédiawaye  | No ORT             | 38.8 (26.8 – 50.3) | 8.4 (3.7 – 15)     | 5 (2.1 – 10)       | 4.3 (1.9 – 8)      |
|                | Dakar       | Pikine      | Any ORS            | 13.7 (7.8 – 21.4)  | 24.1 (16.1 – 33)   | 25 (16.5 – 35)     | 31.1 (21.6 – 42)   |
|                | Dakar       | Pikine      | Only RHF           | 47.2 (36.7 – 58.1) | 67.4 (56.3 – 77.3) | 70 (58.9 – 79.5)   | 64.9 (53.7 – 75)   |
|                | Dakar       | Pikine      | No ORT             | 39 (29.6 – 49.1)   | 8.5 (4.1 – 14.5)   | 5 (2.4 – 9.2)      | 4 (2.1 – 7)        |
|                | Dakar       | Rufisque    | Any ORS            | 11.9 (7.2 – 18.1)  | 25.2 (16.7 – 34.4) | 27.8 (19.1 – 36.9) | 31.8 (23.7 – 40.6) |
|                | Dakar       | Rufisque    | Only RHF           | 46.8 (37.5 – 56.4) | 64.1 (53.8 – 73.3) | 65.9 (55.6 – 75.8) | 63.7 (54.2 – 72.5) |
|                | Dakar       | Rufisque    | No ORT             | 41.3 (32.8 – 50.3) | 10.7 (5.4 – 17.8)  | 6.3 (3.2 – 10.8)   | 4.5 (2.5 – 7.3)    |
|                | Diourbel    | Bambey      | Any ORS            | 9.9 (6.4 – 14.1)   | 20.1 (13.7 – 28)   | 22.4 (15.8 – 29.8) | 24.9 (19 – 31.1)   |
|                | Diourbel    | Bambey      | Only RHF           | 53.1 (45.8 – 60.9) | 73.6 (64.3 – 81.3) | 73.8 (65.9 – 81)   | 72 (65.3 – 78.3)   |
|                | Diourbel    | Bambey      | No ORT             | 37.1 (30.9 – 43.5) | 6.3 (3.2 – 10.4)   | 3.7 (1.8 – 6.5)    | 3.1 (1.7 – 5.1)    |
|                | Diourbel    | Diourbel    | Any ORS            | 10.1 (6.6 – 14.4)  | 20.3 (14.1 – 28.2) | 22 (15.5 – 29.3)   | 24.2 (18.4 – 31.1) |
|                | Diourbel    | Diourbel    | Only RHF           | 54.1 (46.4 – 61.6) | 72.9 (64.1 – 80.4) | 74.3 (66.3 – 81.7) | 72.6 (65.4 – 78.8) |
|                | Diourbel    | Diourbel    | No ORT             | 35.8 (29.1 – 42.8) | 6.7 (3.3 – 11.5)   | 3.7 (1.8 – 6.5)    | 3.2 (1.8 – 5.4)    |
|                | Diourbel    | Mbacké      | Any ORS            | 9.5 (6.2 – 14)     | 19.1 (12.4 – 26.5) | 20.1 (13.7 – 27.7) | 22 (16.7 – 28.2)   |
|                | Diourbel    | Mbacké      | Only RHF           | 56.7 (49.4 – 64.3) | 74.3 (65.6 – 82.3) | 76.1 (67.5 – 83.3) | 74.9 (67.9 – 80.9) |
|                | Diourbel    | Mbacké      | No ORT             | 33.8 (27.2 – 40.7) | 6.6 (3.3 – 11.2)   | 3.8 (1.9 – 6.9)    | 3.2 (1.7 – 5.4)    |
|                | Fatick      | Fatick      | Any ORS            | 13.2 (8.9 – 18.1)  | 23.1 (16.3 – 30.2) | 24.8 (18.4 – 32)   | 28.3 (22.3 – 34.8) |
|                | Fatick      | Fatick      | Only RHF           | 52.5 (45.7 – 59.9) | 71.2 (63.3 – 78.8) | 72.1 (64.5 – 79)   | 68.9 (62.1 – 75.3) |
|                | Fatick      | Fatick      | No ORT             | 34.3 (27.8 – 40.6) | 5.7 (3 – 9.5)      | 3.2 (1.6 – 5.6)    | 2.8 (1.6 – 4.3)    |
| Fatick         | Foundiougne | Any ORS     | 15.8 (10.9 – 21.6) | 24.4 (17.9 – 32)   | 26.9 (20 – 34.9)   | 29.7 (23.6 – 36.7) |                    |
| Fatick         | Foundiougne | Only RHF    | 51.3 (43.7 – 58.8) | 69.4 (61.2 – 77.3) | 69.7 (61 – 77.4)   | 67.8 (60.1 – 74.5) |                    |
| Fatick         | Foundiougne | No ORT      | 32.9 (26 – 40)     | 6.2 (3.2 – 10.3)   | 3.4 (1.8 – 5.7)    | 2.5 (1.4 – 4)      |                    |

|          |                   |          |                    |                    |                    |                    |
|----------|-------------------|----------|--------------------|--------------------|--------------------|--------------------|
| Fatick   | Gossas            | Any ORS  | 11.1 (7.4 – 16)    | 20 (13.3 – 27.9)   | 20.9 (14.9 – 27.6) | 23.9 (18.3 – 30.1) |
| Fatick   | Gossas            | Only RHF | 54.8 (47.3 – 62.7) | 73.7 (64.8 – 81.7) | 75.7 (68.3 – 82.5) | 73.2 (66.2 – 79.5) |
| Fatick   | Gossas            | No ORT   | 34.1 (27.2 – 40.8) | 6.3 (3.3 – 10.4)   | 3.5 (1.7 – 6.1)    | 2.9 (1.6 – 5)      |
| Kaffrine | Birkilane         | Any ORS  | 14.4 (9.5 – 19.9)  | 22.8 (15.8 – 30.7) | 24.1 (17.3 – 31.7) | 25.6 (19.8 – 32.4) |
| Kaffrine | Birkilane         | Only RHF | 53.1 (45.5 – 61.4) | 70.6 (61.9 – 78.7) | 72.4 (63.8 – 79.9) | 72.1 (64.9 – 78.2) |
| Kaffrine | Birkilane         | No ORT   | 32.5 (25.4 – 39.6) | 6.6 (3.4 – 10.8)   | 3.5 (1.8 – 6.3)    | 2.4 (1.3 – 3.8)    |
| Kaffrine | Kaffrine          | Any ORS  | 13.7 (9.1 – 19)    | 21.4 (14.9 – 29)   | 23 (16.5 – 29.8)   | 24.5 (19.4 – 30.4) |
| Kaffrine | Kaffrine          | Only RHF | 53.7 (45.5 – 60.9) | 71.9 (63.5 – 79)   | 73.5 (65.6 – 80.7) | 73.1 (66.8 – 78.9) |
| Kaffrine | Kaffrine          | No ORT   | 32.6 (25.4 – 39.8) | 6.8 (3.6 – 11)     | 3.6 (1.9 – 6.2)    | 2.3 (1.4 – 3.8)    |
| Kaffrine | Koungheul         | Any ORS  | 13.7 (8.9 – 19.9)  | 20.8 (14.9 – 28)   | 22.9 (16.9 – 30)   | 25 (19.5 – 31.3)   |
| Kaffrine | Koungheul         | Only RHF | 53 (44.5 – 61.5)   | 73 (65.4 – 79.6)   | 73.7 (65.9 – 80.5) | 73 (66.3 – 78.9)   |
| Kaffrine | Koungheul         | No ORT   | 33.4 (25.9 – 40.6) | 6.2 (3.2 – 10.4)   | 3.3 (1.7 – 5.9)    | 2 (1.1 – 3.3)      |
| Kaffrine | Malème Hodar      | Any ORS  | 13 (8.7 – 18.7)    | 20.7 (14.3 – 28)   | 22.2 (15.9 – 29)   | 24.2 (19.1 – 30.1) |
| Kaffrine | Malème Hodar      | Only RHF | 54.9 (47 – 63.1)   | 72.8 (65.1 – 80.1) | 74.4 (66.6 – 81.4) | 73.5 (67.3 – 79.1) |
| Kaffrine | Malème Hodar      | No ORT   | 32.1 (24.8 – 39)   | 6.4 (3.4 – 10.4)   | 3.5 (1.8 – 6.1)    | 2.3 (1.3 – 3.7)    |
| Kaolack  | Guinguinéo        | Any ORS  | 13.7 (9 – 18.9)    | 22.8 (15.8 – 30.4) | 23.9 (17.2 – 31.6) | 26.8 (21 – 33.7)   |
| Kaolack  | Guinguinéo        | Only RHF | 52.6 (44.9 – 61)   | 71 (62.3 – 79)     | 72.7 (64.7 – 80.5) | 70.4 (63 – 77)     |
| Kaolack  | Guinguinéo        | No ORT   | 33.6 (26.7 – 41)   | 6.2 (3.3 – 10.6)   | 3.4 (1.7 – 6)      | 2.8 (1.5 – 4.7)    |
| Kaolack  | Kaolack           | Any ORS  | 14.4 (9.9 – 20.1)  | 24.1 (16.8 – 32.4) | 25.9 (19.1 – 33.6) | 28.5 (22.5 – 35.4) |
| Kaolack  | Kaolack           | Only RHF | 51.1 (43.1 – 59.2) | 68.9 (60 – 77.3)   | 70.2 (61.8 – 78)   | 68.5 (61.2 – 75)   |
| Kaolack  | Kaolack           | No ORT   | 34.4 (27.4 – 42.3) | 6.9 (3.7 – 11.5)   | 3.9 (2 – 6.7)      | 3.1 (1.7 – 4.9)    |
| Kaolack  | Nioro du Rip      | Any ORS  | 15 (10.2 – 20.8)   | 22.7 (15.9 – 29.8) | 24.6 (17.9 – 31.7) | 25.8 (20.1 – 31.6) |
| Kaolack  | Nioro du Rip      | Only RHF | 51.8 (44.3 – 59.6) | 70.5 (62.4 – 78.6) | 71.8 (63.8 – 78.8) | 71.9 (65.7 – 77.8) |
| Kaolack  | Nioro du Rip      | No ORT   | 33.2 (26 – 40.1)   | 6.8 (3.6 – 11)     | 3.6 (2 – 6.1)      | 2.4 (1.3 – 3.7)    |
| Kolda    | Kolda             | Any ORS  | 14.9 (9.9 – 21.4)  | 23.4 (16.6 – 30.4) | 25.3 (18.7 – 32.8) | 27 (21.6 – 33.3)   |
| Kolda    | Kolda             | Only RHF | 47.3 (39 – 55.8)   | 70.7 (62.4 – 78.2) | 71.2 (62.8 – 78.5) | 71 (64.4 – 76.6)   |
| Kolda    | Kolda             | No ORT   | 37.8 (30.5 – 45.1) | 6 (3.2 – 10.2)     | 3.5 (1.9 – 5.9)    | 2 (1.1 – 3.2)      |
| Kolda    | Médina Yoro Foula | Any ORS  | 15.3 (10.5 – 21.3) | 22.1 (16.3 – 28.9) | 24.3 (18.3 – 31.9) | 25.6 (20.2 – 31.6) |
| Kolda    | Médina Yoro Foula | Only RHF | 49.5 (41.6 – 57.2) | 71.9 (64.3 – 78.8) | 72.3 (64.2 – 79.1) | 72.5 (66.1 – 78.3) |

|             |                   |          |                    |                    |                    |                    |
|-------------|-------------------|----------|--------------------|--------------------|--------------------|--------------------|
| Kolda       | Médina Yoro Foula | No ORT   | 35.2 (28.2 – 42.5) | 5.9 (3.1 – 9.9)    | 3.4 (1.8 – 5.5)    | 1.9 (1 – 3.1)      |
| Kolda       | Vélingara         | Any ORS  | 14.2 (9.2 – 20.2)  | 22.7 (16 – 30.1)   | 24.3 (18.4 – 31.5) | 26.3 (20.4 – 32.4) |
| Kolda       | Vélingara         | Only RHF | 48.5 (40.6 – 56.4) | 71.9 (63.8 – 79.1) | 72.2 (64.8 – 79)   | 71.7 (65.1 – 78.1) |
| Kolda       | Vélingara         | No ORT   | 37.3 (30.2 – 45)   | 5.4 (2.8 – 8.9)    | 3.5 (1.9 – 5.9)    | 2 (1.1 – 3.5)      |
| Kédougou    | Kédougou          | Any ORS  | 14.5 (9.4 – 21.4)  | 23.4 (17.1 – 31)   | 25 (18.6 – 32.4)   | 26.8 (20.9 – 33.4) |
| Kédougou    | Kédougou          | Only RHF | 50.2 (41.6 – 59.2) | 71 (63.1 – 77.9)   | 71.8 (63.9 – 78.5) | 71.4 (64.5 – 77.5) |
| Kédougou    | Kédougou          | No ORT   | 35.3 (27.4 – 43.3) | 5.7 (3.1 – 9.2)    | 3.2 (1.8 – 5.2)    | 1.8 (0.9 – 3.2)    |
| Kédougou    | Salémata          | Any ORS  | 14.7 (9.6 – 22.4)  | 23.5 (16.8 – 31.7) | 25.4 (18.8 – 33.7) | 27.1 (21 – 35)     |
| Kédougou    | Salémata          | Only RHF | 49.8 (40.4 – 58.9) | 70.9 (62.3 – 78.4) | 71.4 (62.7 – 78.6) | 71.1 (63 – 77.6)   |
| Kédougou    | Salémata          | No ORT   | 35.4 (26.8 – 44.8) | 5.6 (3 – 9.3)      | 3.2 (1.7 – 5.6)    | 1.8 (0.9 – 3.1)    |
| Kédougou    | Saraya            | Any ORS  | 14.6 (9.3 – 21.1)  | 22.8 (16.7 – 29.5) | 24.6 (18.9 – 31.5) | 26.5 (20.7 – 33.2) |
| Kédougou    | Saraya            | Only RHF | 50.1 (41.8 – 58.8) | 71.4 (63.8 – 78)   | 72 (64.7 – 78.4)   | 71.6 (64.5 – 77.7) |
| Kédougou    | Saraya            | No ORT   | 35.3 (27.1 – 43.6) | 5.8 (3.1 – 9.3)    | 3.4 (1.9 – 5.7)    | 1.9 (1 – 3.2)      |
| Tambacounda | Bakel             | Any ORS  | 12.9 (8.6 – 18.1)  | 21.2 (15.7 – 27.3) | 22.7 (17.5 – 28.7) | 25.5 (20.2 – 31.1) |
| Tambacounda | Bakel             | Only RHF | 52.9 (45.4 – 60)   | 73.4 (66.3 – 79.5) | 74.1 (67.3 – 79.9) | 72.7 (66.9 – 78.2) |
| Tambacounda | Bakel             | No ORT   | 34.2 (27.4 – 41)   | 5.4 (3.1 – 8.7)    | 3.1 (1.8 – 5.2)    | 1.8 (1 – 3)        |
| Tambacounda | Goudiry           | Any ORS  | 13.6 (9.3 – 18.8)  | 20.9 (15.8 – 26.5) | 22.5 (17.6 – 28.2) | 25.1 (20 – 30.4)   |
| Tambacounda | Goudiry           | Only RHF | 51 (43.6 – 57.7)   | 73.9 (67.8 – 79.8) | 74.2 (68.3 – 79.8) | 73 (67.3 – 78.4)   |
| Tambacounda | Goudiry           | No ORT   | 35.4 (28.6 – 42.3) | 5.2 (3 – 8.3)      | 3.2 (1.9 – 5.1)    | 1.9 (1.1 – 3)      |
| Tambacounda | Koupentoum        | Any ORS  | 13.6 (9.3 – 19.3)  | 20.5 (15 – 27.3)   | 22.7 (17.1 – 29.5) | 25.4 (19.8 – 31.3) |
| Tambacounda | Koupentoum        | Only RHF | 51.7 (44.1 – 59.5) | 73.8 (66.8 – 80.3) | 74.1 (67 – 80.3)   | 72.6 (66.3 – 78.7) |
| Tambacounda | Koupentoum        | No ORT   | 34.6 (27.6 – 41.5) | 5.7 (3.1 – 9.3)    | 3.2 (1.7 – 5.3)    | 2 (1.1 – 3.2)      |
| Tambacounda | Tambacounda       | Any ORS  | 14 (9.7 – 19.2)    | 21.7 (16.2 – 27.7) | 23.3 (18.4 – 29.1) | 25.6 (20 – 30.8)   |
| Tambacounda | Tambacounda       | Only RHF | 50 (42.9 – 56.8)   | 73.1 (66 – 79.3)   | 73.5 (66.9 – 78.9) | 72.5 (66.6 – 78.2) |
| Tambacounda | Tambacounda       | No ORT   | 35.9 (29.2 – 42.8) | 5.2 (2.9 – 8.3)    | 3.2 (1.9 – 5.1)    | 1.9 (1.1 – 3.1)    |
| Thiès       | Mbour             | Any ORS  | 12.7 (8.6 – 18.2)  | 22.4 (15.7 – 29.9) | 24.3 (17.7 – 31.9) | 27.8 (21.7 – 34.5) |
| Thiès       | Mbour             | Only RHF | 49.8 (42 – 57.8)   | 71.1 (63.1 – 78.8) | 72 (64.1 – 79.4)   | 69.3 (62.2 – 75.4) |
| Thiès       | Mbour             | No ORT   | 37.5 (30.5 – 44.4) | 6.5 (3.5 – 10.6)   | 3.7 (1.9 – 6.5)    | 2.9 (1.7 – 4.7)    |
| Thiès       | Thiès             | Any ORS  | 10.8 (7.1 – 15.4)  | 21.3 (14.3 – 29.4) | 23.7 (16.9 – 32.2) | 26.7 (20.5 – 33.6) |

|                 |            |            |          |                    |                    |                    |                    |
|-----------------|------------|------------|----------|--------------------|--------------------|--------------------|--------------------|
|                 | Thiès      | Thiès      | Only RHF | 50.9 (43 – 58.2)   | 71.8 (62.6 – 80.2) | 72.3 (63 – 79.8)   | 70.1 (63.1 – 76.7) |
|                 | Thiès      | Thiès      | No ORT   | 38.3 (31.3 – 45.3) | 6.9 (3.6 – 11.2)   | 4 (2 – 7)          | 3.1 (1.7 – 5.1)    |
|                 | Thiès      | Tivaouane  | Any ORS  | 11 (7.2 – 15.8)    | 21.9 (15.4 – 29)   | 24.3 (18 – 31.9)   | 26 (20.2 – 32.1)   |
|                 | Thiès      | Tivaouane  | Only RHF | 54.7 (47.4 – 61.5) | 71.9 (63.4 – 79.6) | 72 (64 – 79.1)     | 71.5 (64.9 – 78)   |
|                 | Thiès      | Tivaouane  | No ORT   | 34.3 (27.8 – 40.9) | 6.2 (3.4 – 10.1)   | 3.7 (1.9 – 6.4)    | 2.5 (1.4 – 4.1)    |
| <b>Southern</b> | Sédhiou    | Boukiling  | Any ORS  | 17.2 (12 – 23.5)   | 22.6 (16.1 – 30.1) | 25.2 (18.8 – 33.1) | 26.7 (21 – 33.1)   |
|                 | Sédhiou    | Boukiling  | Only RHF | 47.5 (39.8 – 55.2) | 70.4 (62 – 78.3)   | 71.5 (63.3 – 78.9) | 71.5 (65 – 77.6)   |
|                 | Sédhiou    | Boukiling  | No ORT   | 35.3 (27.9 – 42.7) | 7 (3.7 – 11.5)     | 3.2 (1.7 – 5.2)    | 1.8 (0.9 – 3.1)    |
|                 | Sédhiou    | Goudomp    | Any ORS  | 16.1 (11.1 – 22.7) | 22.2 (15.6 – 29.5) | 25.1 (18.4 – 33.5) | 27.1 (21.2 – 33.4) |
|                 | Sédhiou    | Goudomp    | Only RHF | 46.2 (37.9 – 54.6) | 70.8 (62.4 – 78.7) | 71.5 (62.6 – 79.1) | 70.9 (64 – 77.3)   |
|                 | Sédhiou    | Goudomp    | No ORT   | 37.8 (30 – 45.8)   | 7 (3.6 – 11.4)     | 3.5 (1.8 – 5.8)    | 2 (1.1 – 3.4)      |
|                 | Sédhiou    | Sédhiou    | Any ORS  | 16.8 (11.8 – 23.1) | 22.8 (16.4 – 30)   | 25.4 (18.7 – 33.1) | 27.6 (21.9 – 33.7) |
|                 | Sédhiou    | Sédhiou    | Only RHF | 45.8 (38.1 – 53.6) | 69.9 (61.5 – 77.3) | 71.1 (62.8 – 78.4) | 70.5 (63.9 – 76.5) |
|                 | Sédhiou    | Sédhiou    | No ORT   | 37.5 (30 – 45.3)   | 7.3 (4.1 – 12)     | 3.4 (1.9 – 5.7)    | 1.9 (1.1 – 3.2)    |
|                 | Ziguinchor | Bignona    | Any ORS  | 21.6 (16.1 – 28)   | 26.1 (19.2 – 33.7) | 28.7 (21.9 – 36.8) | 31.1 (25 – 37.7)   |
|                 | Ziguinchor | Bignona    | Only RHF | 42.4 (34.8 – 50.4) | 66.7 (58.3 – 74.3) | 67.9 (59.2 – 75.4) | 66.8 (59.7 – 73.1) |
|                 | Ziguinchor | Bignona    | No ORT   | 35.9 (28.9 – 43.3) | 7.3 (4 – 11.4)     | 3.5 (1.8 – 5.8)    | 2.1 (1.2 – 3.5)    |
|                 | Ziguinchor | Oussouye   | Any ORS  | 21.5 (14.7 – 29.5) | 26.2 (18.5 – 34.9) | 29.4 (21.5 – 38.2) | 32.4 (24.4 – 40.9) |
|                 | Ziguinchor | Oussouye   | Only RHF | 42.7 (33.2 – 52.1) | 66.8 (57.7 – 75.5) | 66.5 (56.3 – 75.2) | 65.2 (56.1 – 73.8) |
|                 | Ziguinchor | Oussouye   | No ORT   | 35.8 (27.2 – 45.2) | 7 (3.5 – 11.7)     | 4.2 (2 – 7.3)      | 2.3 (1.2 – 4.1)    |
|                 | Ziguinchor | Ziguinchor | Any ORS  | 20.4 (14.5 – 27.7) | 24.9 (17.1 – 33.3) | 28.6 (20.9 – 37.6) | 31.9 (24.9 – 40)   |
|                 | Ziguinchor | Ziguinchor | Only RHF | 42.4 (32.7 – 51.3) | 67.5 (58.1 – 76.9) | 67.3 (57.6 – 75.6) | 65.7 (57.1 – 73.1) |
|                 | Ziguinchor | Ziguinchor | No ORT   | 37.2 (28.9 – 46.4) | 7.6 (4 – 12.9)     | 4 (2.1 – 7.1)      | 2.4 (1.3 – 4.1)    |

648  
649

650 **Additional file 1: Table S11. Changes in oral rehydration therapies in three time periods.**  
 651 Rates of change over time in oral rehydration therapies in a) Sierra Leone, b) Mali, and c) Senegal.

652

653 **a) Sierra Leone**

654 Average yearly change in treatment coverage by Province, District, Treatment (Any ORS, Only RHF, and No ORT) for three time periods. Estimates  
 655 are shown as percentage change per year in the format: mean (2.5%–97.5% uncertainty interval). The Change column indicates whether there was a  
 656 greater than 95% posterior probability of increase or decrease in each time period. Groups and time periods correspond to those presented in Figure 2.  
 657

| Group    | Province | District      | Treatment | 2000 – 2009        | Change    | 2009 – 2013        | Change    | 2013 – 2017        | Change    |
|----------|----------|---------------|-----------|--------------------|-----------|--------------------|-----------|--------------------|-----------|
| Western  | Western  | Western Rural | Any ORS   | 1.4 (0 – 2.7)      | Increase  | 2.9 (0.3 – 6)      | Increase  | -3.2 (-5.5 – -1.1) | Decrease  |
|          | Western  | Western Rural | Only RHF  | -0.2 (-1.5 – 1.2)  | Uncertain | -2.3 (-5.3 – 0.2)  | Uncertain | 3 (0.9 – 5.4)      | Increase  |
|          | Western  | Western Rural | No ORT    | -1.2 (-1.8 – -0.6) | Decrease  | -0.6 (-1.7 – 0)    | Uncertain | 0.2 (-0.2 – 0.7)   | Uncertain |
|          | Western  | Western Urban | Any ORS   | 1.3 (-0.4 – 2.6)   | Uncertain | 3.1 (0.3 – 6.4)    | Increase  | -3.9 (-6.3 – -1.5) | Decrease  |
|          | Western  | Western Urban | Only RHF  | -0.1 (-1.4 – 1.6)  | Uncertain | -2.5 (-5.9 – 0.3)  | Uncertain | 3.7 (1.4 – 6.2)    | Increase  |
|          | Western  | Western Urban | No ORT    | -1.2 (-1.9 – -0.5) | Decrease  | -0.6 (-1.8 – 0)    | Uncertain | 0.2 (-0.3 – 0.8)   | Uncertain |
| Northern | Northern | Bombali       | Any ORS   | 4.5 (2.9 – 5.8)    | Increase  | 3.2 (0.7 – 6.2)    | Increase  | -3.2 (-5.4 – -1.3) | Decrease  |
|          | Northern | Bombali       | Only RHF  | -3 (-4.4 – -1.4)   | Decrease  | -2.4 (-5.3 – 0.1)  | Uncertain | 3.2 (1.2 – 5.4)    | Increase  |
|          | Northern | Bombali       | No ORT    | -1.4 (-2.3 – -0.7) | Decrease  | -0.8 (-2.1 – -0.1) | Decrease  | 0 (-0.3 – 0.4)     | Uncertain |
|          | Northern | Kambia        | Any ORS   | 3.6 (2 – 5.2)      | Increase  | 2.8 (0.1 – 6.1)    | Increase  | -2.2 (-4.8 – -0.1) | Decrease  |
|          | Northern | Kambia        | Only RHF  | -1.8 (-3.5 – 0)    | Decrease  | -2.2 (-5.5 – 0.4)  | Uncertain | 2.1 (0 – 4.6)      | Uncertain |
|          | Northern | Kambia        | No ORT    | -1.8 (-2.7 – -1)   | Decrease  | -0.6 (-1.7 – 0)    | Uncertain | 0.1 (-0.2 – 0.6)   | Uncertain |
|          | Northern | Koinadugu     | Any ORS   | 3.3 (1.6 – 4.8)    | Increase  | 2 (-0.8 – 5.4)     | Uncertain | -0.5 (-2.5 – 1.4)  | Uncertain |
|          | Northern | Koinadugu     | Only RHF  | -2.1 (-3.7 – -0.3) | Decrease  | -1.3 (-4.3 – 1.4)  | Uncertain | 0.5 (-1.4 – 2.5)   | Uncertain |
|          | Northern | Koinadugu     | No ORT    | -1.2 (-2.1 – -0.4) | Decrease  | -0.8 (-2.1 – 0)    | Decrease  | 0 (-0.3 – 0.4)     | Uncertain |
|          | Northern | Port Loko     | Any ORS   | 3 (1.5 – 4.3)      | Increase  | 3 (0.3 – 6.1)      | Increase  | -2.6 (-4.5 – -0.9) | Decrease  |
|          | Northern | Port Loko     | Only RHF  | -1.6 (-3 – 0)      | Decrease  | -2.3 (-5.4 – 0.4)  | Uncertain | 2.5 (0.8 – 4.4)    | Increase  |
|          | Northern | Port Loko     | No ORT    | -1.4 (-2 – -0.8)   | Decrease  | -0.7 (-1.8 – 0)    | Decrease  | 0.1 (-0.2 – 0.6)   | Uncertain |
|          | Northern | Tonkolili     | Any ORS   | 3.8 (2.4 – 5.1)    | Increase  | 3 (0.9 – 5.7)      | Increase  | -2.5 (-4.3 – -0.9) | Decrease  |
|          | Northern | Tonkolili     | Only RHF  | -2.8 (-4.1 – -1.3) | Decrease  | -2.2 (-4.8 – 0)    | Uncertain | 2.6 (0.9 – 4.3)    | Increase  |
|          | Northern | Tonkolili     | No ORT    | -1 (-1.7 – -0.4)   | Decrease  | -0.9 (-2 – -0.1)   | Decrease  | 0 (-0.3 – 0.3)     | Uncertain |



| Southern and Eastern |          |          |                    |           |                    |           |                    |           |  |
|----------------------|----------|----------|--------------------|-----------|--------------------|-----------|--------------------|-----------|--|
| Eastern              | Kailahun | Any ORS  | 0 (-2 – 1.8)       | Uncertain | 5.7 (2.3 – 9.4)    | Increase  | -0.3 (-2.4 – 1.7)  | Uncertain |  |
| Eastern              | Kailahun | Only RHF | 0 (-1.8 – 2)       | Uncertain | -4.7 (-8.3 – -1.5) | Decrease  | 0.7 (-1.3 – 2.8)   | Uncertain |  |
| Eastern              | Kailahun | No ORT   | 0 (-0.7 – 1)       | Uncertain | -1 (-3 – 0.3)      | Uncertain | -0.4 (-1.2 – 0.2)  | Uncertain |  |
| Eastern              | Kenema   | Any ORS  | 0.6 (-1.2 – 2)     | Uncertain | 5.3 (2.6 – 8.6)    | Increase  | -0.1 (-1.6 – 1.3)  | Uncertain |  |
| Eastern              | Kenema   | Only RHF | -0.4 (-1.9 – 1.3)  | Uncertain | -4 (-7.4 – -1.3)   | Decrease  | 0.2 (-1.2 – 1.7)   | Uncertain |  |
| Eastern              | Kenema   | No ORT   | -0.1 (-0.7 – 0.6)  | Uncertain | -1.2 (-2.8 – -0.2) | Decrease  | -0.1 (-0.4 – 0.1)  | Uncertain |  |
| Eastern              | Kono     | Any ORS  | 1 (-0.8 – 2.6)     | Uncertain | 6 (2.9 – 9.6)      | Increase  | -2.6 (-4.6 – -0.8) | Decrease  |  |
| Eastern              | Kono     | Only RHF | -0.6 (-2.1 – 1.3)  | Uncertain | -5.2 (-8.7 – -2.3) | Decrease  | 2.8 (1 – 4.8)      | Increase  |  |
| Eastern              | Kono     | No ORT   | -0.5 (-1.1 – 0.3)  | Uncertain | -0.8 (-2.3 – 0.1)  | Uncertain | -0.2 (-0.6 – 0.2)  | Uncertain |  |
| Southern             | Bo       | Any ORS  | 1.3 (-0.4 – 2.7)   | Uncertain | 4.4 (1.9 – 7.4)    | Increase  | -0.9 (-2.4 – 0.4)  | Uncertain |  |
| Southern             | Bo       | Only RHF | -1 (-2.5 – 0.6)    | Uncertain | -3.1 (-6 – -0.7)   | Decrease  | 1 (-0.4 – 2.5)     | Uncertain |  |
| Southern             | Bo       | No ORT   | -0.2 (-0.9 – 0.6)  | Uncertain | -1.3 (-2.9 – -0.2) | Decrease  | -0.1 (-0.4 – 0.2)  | Uncertain |  |
| Southern             | Bonthe   | Any ORS  | 1 (-1.1 – 2.9)     | Uncertain | 5.1 (2.1 – 8.7)    | Increase  | -0.9 (-3 – 1)      | Uncertain |  |
| Southern             | Bonthe   | Only RHF | -0.4 (-2.3 – 1.7)  | Uncertain | -4.4 (-8.2 – -1.4) | Decrease  | 0.9 (-1 – 3)       | Uncertain |  |
| Southern             | Bonthe   | No ORT   | -0.7 (-1.4 – 0)    | Decrease  | -0.6 (-1.6 – -0.1) | Decrease  | 0 (-0.2 – 0.3)     | Uncertain |  |
| Southern             | Moyamba  | Any ORS  | 2 (0.4 – 3.5)      | Increase  | 3.3 (0.7 – 6.2)    | Increase  | -1.6 (-3.8 – 0.1)  | Uncertain |  |
| Southern             | Moyamba  | Only RHF | -1.1 (-2.7 – 0.5)  | Uncertain | -2.4 (-5.2 – 0.1)  | Uncertain | 1.5 (-0.2 – 3.7)   | Uncertain |  |
| Southern             | Moyamba  | No ORT   | -0.8 (-1.5 – -0.2) | Decrease  | -0.8 (-2 – -0.1)   | Decrease  | 0.1 (-0.2 – 0.5)   | Uncertain |  |
| Southern             | Pujehun  | Any ORS  | 0.1 (-2 – 2.2)     | Uncertain | 6 (2.5 – 9.9)      | Increase  | -0.3 (-2.1 – 1.4)  | Uncertain |  |
| Southern             | Pujehun  | Only RHF | 0.1 (-2 – 2.3)     | Uncertain | -5.1 (-9 – -1.6)   | Decrease  | 0.3 (-1.4 – 2)     | Uncertain |  |
| Southern             | Pujehun  | No ORT   | -0.2 (-0.9 – 0.6)  | Uncertain | -0.9 (-2.4 – -0.1) | Decrease  | 0 (-0.4 – 0.4)     | Uncertain |  |

658

659

660 **b) Mali**

661 Average yearly change in treatment coverage by Region, Cercle, Treatment (Any ORS, Only RHF, and No ORT) for three time periods. Estimates are  
 662 shown as percentage change per year in the format: mean (2.5%–97.5% uncertainty interval). The Change column indicates whether there was a  
 663 greater than 95% posterior probability of increase or decrease in each time period. Groups and time periods correspond to those presented in Figure 3.  
 664

| Group           | Region | Cercle   | Treatment | 2001 – 2004        | Change    | 2004 – 2011       | Change    | 2011 – 2018       | Change    |
|-----------------|--------|----------|-----------|--------------------|-----------|-------------------|-----------|-------------------|-----------|
| <b>Bamako</b>   | Bamako | Bamako   | Any ORS   | -2.3 (-9.4 – 7.4)  | Uncertain | 0.4 (-4.7 – 5.1)  | Uncertain | -0.3 (-4.2 – 2.7) | Uncertain |
|                 | Bamako | Bamako   | Only RHF  | 9 (-2.7 – 17.7)    | Uncertain | -0.5 (-6 – 5.6)   | Uncertain | 1.7 (-1.8 – 6.2)  | Uncertain |
|                 | Bamako | Bamako   | No ORT    | -6.7 (-10.7 – 0.1) | Uncertain | 0.1 (-3.1 – 3.5)  | Uncertain | -1.4 (-4.2 – 0)   | Decrease  |
| <b>Northern</b> | Gao    | Ansongo  | Any ORS   | 2 (-2.6 – 9.7)     | Uncertain | 0.3 (-3.3 – 4)    | Uncertain | 2.4 (-1.3 – 5.4)  | Uncertain |
|                 | Gao    | Ansongo  | Only RHF  | -4.1 (-13.2 – 2.1) | Uncertain | -0.4 (-5.1 – 4.5) | Uncertain | -1.9 (-5.8 – 2.4) | Uncertain |
|                 | Gao    | Ansongo  | No ORT    | 2.1 (-0.9 – 7.9)   | Uncertain | 0.1 (-2.9 – 2.8)  | Uncertain | -0.4 (-3.2 – 1.6) | Uncertain |
|                 | Gao    | Bourem   | Any ORS   | 1 (-3.2 – 7.5)     | Uncertain | 0.2 (-3 – 3.3)    | Uncertain | 3 (0 – 5.3)       | Increase  |
|                 | Gao    | Bourem   | Only RHF  | -2.5 (-11.2 – 3.1) | Uncertain | -0.4 (-4.6 – 3.8) | Uncertain | -2.2 (-5.1 – 1.6) | Uncertain |
|                 | Gao    | Bourem   | No ORT    | 1.5 (-1.5 – 6.3)   | Uncertain | 0.2 (-2.2 – 2.7)  | Uncertain | -0.8 (-3 – 0.5)   | Uncertain |
|                 | Gao    | Gao      | Any ORS   | 0.6 (-5.1 – 8.8)   | Uncertain | -0.2 (-3.9 – 3.6) | Uncertain | 2.9 (-0.4 – 5.4)  | Uncertain |
|                 | Gao    | Gao      | Only RHF  | -2.4 (-12.9 – 4.8) | Uncertain | 0.4 (-4.3 – 5.2)  | Uncertain | -2.6 (-5.6 – 1.3) | Uncertain |
|                 | Gao    | Gao      | No ORT    | 1.8 (-1.6 – 8.4)   | Uncertain | -0.2 (-3.2 – 2.3) | Uncertain | -0.3 (-2.5 – 1.1) | Uncertain |
|                 | Gao    | Ménaka   | Any ORS   | 0.4 (-4.5 – 5.6)   | Uncertain | 0.6 (-2.1 – 3.5)  | Uncertain | 0.3 (-2.8 – 3.4)  | Uncertain |
|                 | Gao    | Ménaka   | Only RHF  | 0.3 (-7.5 – 7.1)   | Uncertain | -0.6 (-4.2 – 3.2) | Uncertain | 0.2 (-3.3 – 4.1)  | Uncertain |
|                 | Gao    | Ménaka   | No ORT    | -0.8 (-4.9 – 4.1)  | Uncertain | 0 (-2.2 – 2.2)    | Uncertain | -0.5 (-2.5 – 1.3) | Uncertain |
|                 | Kidal  | Abeïbara | Any ORS   | 0.9 (-3.9 – 6.7)   | Uncertain | -0.3 (-3 – 2.2)   | Uncertain | 0.6 (-1.9 – 3.3)  | Uncertain |
|                 | Kidal  | Abeïbara | Only RHF  | -1.8 (-9.8 – 5)    | Uncertain | 0.5 (-3.3 – 4.3)  | Uncertain | -0.4 (-3.8 – 2.9) | Uncertain |
|                 | Kidal  | Abeïbara | No ORT    | 0.9 (-3.2 – 6.3)   | Uncertain | -0.2 (-2.5 – 1.9) | Uncertain | -0.2 (-2.3 – 1.5) | Uncertain |
|                 | Kidal  | Kidal    | Any ORS   | 1.1 (-3.6 – 7.7)   | Uncertain | 0 (-3 – 3)        | Uncertain | 0.5 (-2.5 – 2.6)  | Uncertain |
|                 | Kidal  | Kidal    | Only RHF  | -2.4 (-11.2 – 4.2) | Uncertain | 0 (-4.3 – 4.4)    | Uncertain | -0.3 (-3.2 – 3.5) | Uncertain |
|                 | Kidal  | Kidal    | No ORT    | 1.2 (-1.9 – 6.7)   | Uncertain | 0 (-2.4 – 2.6)    | Uncertain | -0.2 (-2.4 – 1.3) | Uncertain |
|                 | Kidal  | Tessalit | Any ORS   | 1 (-3.2 – 6.4)     | Uncertain | -0.1 (-2.5 – 2.6) | Uncertain | 0.7 (-1.9 – 3.3)  | Uncertain |
|                 | Kidal  | Tessalit | Only RHF  | -2 (-9.7 – 3.6)    | Uncertain | 0.2 (-3.1 – 3.5)  | Uncertain | -0.4 (-3.8 – 2.9) | Uncertain |
|                 | Kidal  | Tessalit | No ORT    | 1 (-2.3 – 5.6)     | Uncertain | -0.1 (-2.2 – 1.8) | Uncertain | -0.2 (-2.1 – 1.4) | Uncertain |

|          |            |          |                    |           |                   |           |                   |           |
|----------|------------|----------|--------------------|-----------|-------------------|-----------|-------------------|-----------|
| Kidal    | Tin-Essako | Any ORS  | 0.9 (-4.1 – 7.3)   | Uncertain | -0.1 (-3 – 2.9)   | Uncertain | 0.4 (-2.7 – 3.1)  | Uncertain |
| Kidal    | Tin-Essako | Only RHF | -1.7 (-10.4 – 5.1) | Uncertain | 0.2 (-3.6 – 4.3)  | Uncertain | -0.2 (-3.6 – 3.3) | Uncertain |
| Kidal    | Tin-Essako | No ORT   | 0.8 (-3.3 – 6)     | Uncertain | -0.1 (-2.6 – 2.2) | Uncertain | -0.2 (-2.4 – 1.5) | Uncertain |
| Mopti    | Bandiagara | Any ORS  | 3 (-1.7 – 10.5)    | Uncertain | 0.3 (-3.6 – 4.1)  | Uncertain | 2.1 (-1.1 – 4.6)  | Uncertain |
| Mopti    | Bandiagara | Only RHF | -4.3 (-14.6 – 2.4) | Uncertain | 0 (-5 – 4.9)      | Uncertain | -1.7 (-4.7 – 2.3) | Uncertain |
| Mopti    | Bandiagara | No ORT   | 1.3 (-2.2 – 7.3)   | Uncertain | -0.3 (-3.3 – 2.5) | Uncertain | -0.5 (-2.8 – 0.8) | Uncertain |
| Mopti    | Bankass    | Any ORS  | 2.9 (-1.5 – 10.3)  | Uncertain | 0.2 (-3.6 – 4.2)  | Uncertain | 1.3 (-2.3 – 3.7)  | Uncertain |
| Mopti    | Bankass    | Only RHF | -2.5 (-12.5 – 4.2) | Uncertain | 0.2 (-5 – 5.2)    | Uncertain | -0.8 (-3.7 – 3.8) | Uncertain |
| Mopti    | Bankass    | No ORT   | -0.4 (-4.4 – 6.4)  | Uncertain | -0.4 (-3.8 – 2.3) | Uncertain | -0.6 (-2.8 – 0.6) | Uncertain |
| Mopti    | Djenné     | Any ORS  | 2.9 (-1.4 – 10.8)  | Uncertain | 0.1 (-3.3 – 3.9)  | Uncertain | 0.5 (-2.8 – 3.1)  | Uncertain |
| Mopti    | Djenné     | Only RHF | -4.7 (-14.8 – 1.9) | Uncertain | -0.5 (-5.7 – 4.7) | Uncertain | 0.9 (-2.4 – 5.3)  | Uncertain |
| Mopti    | Djenné     | No ORT   | 1.8 (-1.7 – 9.2)   | Uncertain | 0.3 (-3.1 – 3.6)  | Uncertain | -1.4 (-4.5 – 0.2) | Uncertain |
| Mopti    | Douentza   | Any ORS  | 2.8 (-0.8 – 9)     | Uncertain | 0.6 (-2.4 – 3.7)  | Uncertain | 1.4 (-1.9 – 4.4)  | Uncertain |
| Mopti    | Douentza   | Only RHF | -4.6 (-13 – 0.8)   | Uncertain | -0.2 (-4.3 – 3.7) | Uncertain | -1.1 (-4.5 – 2.8) | Uncertain |
| Mopti    | Douentza   | No ORT   | 1.8 (-1 – 7.3)     | Uncertain | -0.4 (-2.9 – 1.7) | Uncertain | -0.3 (-2.1 – 1)   | Uncertain |
| Mopti    | Koro       | Any ORS  | 2.9 (-1.4 – 11)    | Uncertain | 0.3 (-3.2 – 3.9)  | Uncertain | 2.2 (-1.4 – 5)    | Uncertain |
| Mopti    | Koro       | Only RHF | -3.8 (-13.2 – 2.7) | Uncertain | 0.3 (-4.3 – 5)    | Uncertain | -2.1 (-5.2 – 1.8) | Uncertain |
| Mopti    | Koro       | No ORT   | 0.9 (-2.6 – 6.9)   | Uncertain | -0.6 (-3.2 – 1.5) | Uncertain | -0.1 (-1.8 – 1.2) | Uncertain |
| Mopti    | Mopti      | Any ORS  | 3.4 (-0.8 – 10.9)  | Uncertain | 0.5 (-3.4 – 4.8)  | Uncertain | 2.2 (-1.4 – 5)    | Uncertain |
| Mopti    | Mopti      | Only RHF | -4.8 (-14.4 – 1.1) | Uncertain | -1 (-6.1 – 3.8)   | Uncertain | -1 (-4.4 – 3.2)   | Uncertain |
| Mopti    | Mopti      | No ORT   | 1.4 (-1.8 – 7.6)   | Uncertain | 0.5 (-2.7 – 3.7)  | Uncertain | -1.2 (-4.3 – 0.6) | Uncertain |
| Mopti    | Téniékou   | Any ORS  | 3.3 (-0.8 – 10.2)  | Uncertain | 0.7 (-2.8 – 4.5)  | Uncertain | 1.4 (-2.4 – 4.8)  | Uncertain |
| Mopti    | Téniékou   | Only RHF | -5 (-14.7 – 0.7)   | Uncertain | -1 (-5.9 – 3.6)   | Uncertain | -0.4 (-4.4 – 4.3) | Uncertain |
| Mopti    | Téniékou   | No ORT   | 1.7 (-1.4 – 8.2)   | Uncertain | 0.3 (-2.9 – 3.4)  | Uncertain | -1 (-4 – 0.8)     | Uncertain |
| Mopti    | Youwarou   | Any ORS  | 2.9 (-0.6 – 9.5)   | Uncertain | 1.1 (-2.7 – 5.3)  | Uncertain | 1.1 (-2.8 – 4)    | Uncertain |
| Mopti    | Youwarou   | Only RHF | -4.4 (-13.1 – 0.8) | Uncertain | -1.4 (-6.2 – 3.5) | Uncertain | -0.1 (-3.7 – 4.6) | Uncertain |
| Mopti    | Youwarou   | No ORT   | 1.5 (-1.2 – 7.7)   | Uncertain | 0.2 (-2.8 – 3.2)  | Uncertain | -1 (-3.7 – 0.4)   | Uncertain |
| Timbuktu | Diré       | Any ORS  | 3.4 (-0.7 – 11.4)  | Uncertain | 0.8 (-3.4 – 4.8)  | Uncertain | 0.3 (-3.3 – 2.9)  | Uncertain |
| Timbuktu | Diré       | Only RHF | -5.4 (-16 – 0.6)   | Uncertain | -0.5 (-5.4 – 4.5) | Uncertain | 0.2 (-2.8 – 4.6)  | Uncertain |

|                 |          |                |          |                     |           |                   |           |                   |           |
|-----------------|----------|----------------|----------|---------------------|-----------|-------------------|-----------|-------------------|-----------|
|                 | Timbuktu | Diré           | No ORT   | 2 (-1 – 8.1)        | Uncertain | -0.3 (-3.3 – 2.2) | Uncertain | -0.6 (-2.9 – 0.5) | Uncertain |
|                 | Timbuktu | Goundam        | Any ORS  | 3 (-0.5 – 9.6)      | Uncertain | 0.7 (-2.5 – 4)    | Uncertain | 0.3 (-2.9 – 2.4)  | Uncertain |
|                 | Timbuktu | Goundam        | Only RHF | -5 (-14.1 – 0.1)    | Uncertain | -0.4 (-4.7 – 3.8) | Uncertain | 0.2 (-2.3 – 4)    | Uncertain |
|                 | Timbuktu | Goundam        | No ORT   | 1.9 (-0.8 – 6.9)    | Uncertain | -0.3 (-2.7 – 1.9) | Uncertain | -0.6 (-2.5 – 0.4) | Uncertain |
|                 | Timbuktu | Gourma-Rharous | Any ORS  | 2.5 (-1.1 – 8.4)    | Uncertain | 0.2 (-2.9 – 2.9)  | Uncertain | 2.1 (-0.9 – 4.6)  | Uncertain |
|                 | Timbuktu | Gourma-Rharous | Only RHF | -4.3 (-11.9 – 0.6)  | Uncertain | 0.1 (-3.5 – 3.9)  | Uncertain | -1.6 (-4.6 – 1.8) | Uncertain |
|                 | Timbuktu | Gourma-Rharous | No ORT   | 1.9 (-0.9 – 6.8)    | Uncertain | -0.3 (-2.5 – 1.9) | Uncertain | -0.5 (-2.3 – 0.7) | Uncertain |
|                 | Timbuktu | Niafunké       | Any ORS  | 3 (-0.4 – 9.5)      | Uncertain | 1 (-2.4 – 4.6)    | Uncertain | 0.6 (-3 – 2.9)    | Uncertain |
|                 | Timbuktu | Niafunké       | Only RHF | -4.8 (-13.4 – 0.4)  | Uncertain | -0.9 (-5.4 – 3.5) | Uncertain | 0.3 (-2.6 – 4.2)  | Uncertain |
|                 | Timbuktu | Niafunké       | No ORT   | 1.8 (-1.1 – 7.5)    | Uncertain | -0.1 (-2.9 – 2.4) | Uncertain | -0.8 (-3 – 0.3)   | Uncertain |
|                 | Timbuktu | Tombouctou     | Any ORS  | 3 (-0.7 – 9.9)      | Uncertain | 0 (-3.3 – 3.3)    | Uncertain | 1.2 (-1.7 – 3.3)  | Uncertain |
|                 | Timbuktu | Tombouctou     | Only RHF | -5 (-13.9 – 0.5)    | Uncertain | 0.4 (-3.6 – 4.7)  | Uncertain | -1 (-3.4 – 2.4)   | Uncertain |
|                 | Timbuktu | Tombouctou     | No ORT   | 2 (-0.7 – 7.4)      | Uncertain | -0.4 (-3.1 – 1.5) | Uncertain | -0.3 (-1.8 – 0.7) | Uncertain |
| <b>Southern</b> | Kayes    | Bafoulabé      | Any ORS  | 1.7 (-2.8 – 8.5)    | Uncertain | 0.4 (-3.2 – 4.1)  | Uncertain | -0.3 (-3.4 – 2.1) | Uncertain |
|                 | Kayes    | Bafoulabé      | Only RHF | 9.9 (1.2 – 16.4)    | Increase  | -0.2 (-4.5 – 4.3) | Uncertain | 1.4 (-1.5 – 5.2)  | Uncertain |
|                 | Kayes    | Bafoulabé      | No ORT   | -11.6 (-16 – -5.6)  | Decrease  | -0.2 (-2.9 – 2.4) | Uncertain | -1.1 (-3.3 – 0)   | Uncertain |
|                 | Kayes    | Diéma          | Any ORS  | 2.8 (-1.5 – 9.7)    | Uncertain | 0.2 (-3.3 – 4)    | Uncertain | -1.4 (-4.5 – 0.6) | Uncertain |
|                 | Kayes    | Diéma          | Only RHF | 2.9 (-6 – 9.6)      | Uncertain | 0.1 (-4.3 – 4.6)  | Uncertain | 2.2 (-0.2 – 6)    | Uncertain |
|                 | Kayes    | Diéma          | No ORT   | -5.8 (-9.9 – 0.5)   | Uncertain | -0.4 (-3 – 2.3)   | Uncertain | -0.8 (-2.8 – 0.1) | Uncertain |
|                 | Kayes    | Kayes          | Any ORS  | -2.3 (-7.9 – 5.4)   | Uncertain | 0.3 (-3.8 – 4)    | Uncertain | -0.3 (-3.7 – 2.2) | Uncertain |
|                 | Kayes    | Kayes          | Only RHF | 8.5 (-1.6 – 16)     | Uncertain | -0.1 (-4.6 – 4.8) | Uncertain | 1.1 (-1.9 – 5.1)  | Uncertain |
|                 | Kayes    | Kayes          | No ORT   | -6.2 (-10.6 – -0.2) | Decrease  | -0.2 (-2.7 – 2)   | Uncertain | -0.7 (-2.7 – 0.3) | Uncertain |
|                 | Kayes    | Kita           | Any ORS  | 3.6 (-0.8 – 10.7)   | Uncertain | 0.4 (-3.3 – 3.6)  | Uncertain | -0.3 (-3.3 – 2)   | Uncertain |
|                 | Kayes    | Kita           | Only RHF | 3.5 (-5.5 – 10.1)   | Uncertain | -0.1 (-4.3 – 4.6) | Uncertain | 1.3 (-1.3 – 4.9)  | Uncertain |
|                 | Kayes    | Kita           | No ORT   | -7.1 (-11.2 – -1.1) | Decrease  | -0.2 (-2.9 – 2.2) | Uncertain | -1.1 (-3.1 – 0)   | Decrease  |
|                 | Kayes    | Kéniéba        | Any ORS  | 1.8 (-3.2 – 10)     | Uncertain | 0.4 (-3.4 – 4.2)  | Uncertain | 0.1 (-3.3 – 2.6)  | Uncertain |
|                 | Kayes    | Kéniéba        | Only RHF | 3.7 (-6 – 11)       | Uncertain | -0.5 (-5.4 – 4.5) | Uncertain | 1.4 (-1.9 – 5.5)  | Uncertain |
|                 | Kayes    | Kéniéba        | No ORT   | -5.6 (-10.7 – 1.2)  | Uncertain | 0.1 (-2.8 – 3.2)  | Uncertain | -1.5 (-4.1 – 0)   | Uncertain |
|                 | Kayes    | Nioro          | Any ORS  | 1.6 (-3.1 – 9)      | Uncertain | 0.6 (-2.7 – 4.3)  | Uncertain | -1.9 (-5.1 – 0.1) | Uncertain |

|           |           |          |                      |           |                   |           |                    |           |
|-----------|-----------|----------|----------------------|-----------|-------------------|-----------|--------------------|-----------|
| Kayes     | Nioro     | Only RHF | 0.1 (-8.7 – 6.6)     | Uncertain | -0.3 (-5.3 – 4)   | Uncertain | 2.7 (0.1 – 6.8)    | Increase  |
| Kayes     | Nioro     | No ORT   | -1.7 (-5.7 – 3.9)    | Uncertain | -0.3 (-2.8 – 2.4) | Uncertain | -0.8 (-2.9 – 0.2)  | Uncertain |
| Kayes     | Yélimané  | Any ORS  | -1.1 (-6.4 – 7.1)    | Uncertain | 0.5 (-3.3 – 4.5)  | Uncertain | -1.5 (-4.9 – 0.8)  | Uncertain |
| Kayes     | Yélimané  | Only RHF | 2.2 (-7.5 – 9)       | Uncertain | -0.3 (-5 – 4.4)   | Uncertain | 2.2 (-0.6 – 6.4)   | Uncertain |
| Kayes     | Yélimané  | No ORT   | -1 (-5.1 – 4.6)      | Uncertain | -0.3 (-3 – 2.2)   | Uncertain | -0.7 (-2.9 – 0.2)  | Uncertain |
| Koulikoro | Banamba   | Any ORS  | 2.2 (-2.5 – 10.1)    | Uncertain | 0.2 (-3.7 – 4)    | Uncertain | 0.2 (-3.4 – 2.9)   | Uncertain |
| Koulikoro | Banamba   | Only RHF | 8.5 (-1.7 – 15.7)    | Uncertain | 0.2 (-4.5 – 4.8)  | Uncertain | 0.4 (-3 – 4.5)     | Uncertain |
| Koulikoro | Banamba   | No ORT   | -10.6 (-15.7 – -3.4) | Decrease  | -0.3 (-3.6 – 2.2) | Uncertain | -0.6 (-2.9 – 0.8)  | Uncertain |
| Koulikoro | Dioïla    | Any ORS  | -0.5 (-5.4 – 7)      | Uncertain | 0.5 (-3.2 – 4.3)  | Uncertain | -0.2 (-3.7 – 2.3)  | Uncertain |
| Koulikoro | Dioïla    | Only RHF | 4.7 (-5.6 – 11.5)    | Uncertain | -0.3 (-5 – 4.8)   | Uncertain | 0.9 (-2.1 – 4.8)   | Uncertain |
| Koulikoro | Dioïla    | No ORT   | -4.2 (-8.6 – 2.1)    | Uncertain | -0.2 (-3 – 2.5)   | Uncertain | -0.7 (-3 – 0.5)    | Uncertain |
| Koulikoro | Kangaba   | Any ORS  | 3.2 (-2.1 – 11.5)    | Uncertain | 0.8 (-3.5 – 4.7)  | Uncertain | 0 (-4.1 – 3.4)     | Uncertain |
| Koulikoro | Kangaba   | Only RHF | -3 (-13.6 – 4.5)     | Uncertain | -1 (-5.8 – 4.4)   | Uncertain | 1.1 (-3.1 – 5.6)   | Uncertain |
| Koulikoro | Kangaba   | No ORT   | -0.2 (-4.3 – 6.6)    | Uncertain | 0.2 (-3.1 – 3.2)  | Uncertain | -1.1 (-3.8 – 0.6)  | Uncertain |
| Koulikoro | Kati      | Any ORS  | -0.5 (-6.2 – 8.3)    | Uncertain | 0.4 (-3.8 – 4.3)  | Uncertain | -0.1 (-3.6 – 2.4)  | Uncertain |
| Koulikoro | Kati      | Only RHF | 6.1 (-5 – 13.6)      | Uncertain | -0.5 (-5.1 – 4.7) | Uncertain | 1.4 (-1.7 – 5.5)   | Uncertain |
| Koulikoro | Kati      | No ORT   | -5.6 (-9.3 – 0.9)    | Uncertain | 0.1 (-2.9 – 3.2)  | Uncertain | -1.4 (-3.9 – -0.1) | Decrease  |
| Koulikoro | Kolokani  | Any ORS  | 1.5 (-3.7 – 9)       | Uncertain | 0 (-3.7 – 3.7)    | Uncertain | -0.2 (-3.7 – 2.3)  | Uncertain |
| Koulikoro | Kolokani  | Only RHF | 4 (-5.2 – 11.1)      | Uncertain | 0.1 (-4.6 – 4.8)  | Uncertain | 1.3 (-1.7 – 5.3)   | Uncertain |
| Koulikoro | Kolokani  | No ORT   | -5.4 (-9.8 – 1.2)    | Uncertain | -0.1 (-3 – 2.6)   | Uncertain | -1.1 (-3.5 – 0.1)  | Uncertain |
| Koulikoro | Koulikoro | Any ORS  | 0.4 (-4.7 – 8.5)     | Uncertain | 0.2 (-3.7 – 4)    | Uncertain | 0.1 (-3.6 – 2.5)   | Uncertain |
| Koulikoro | Koulikoro | Only RHF | 10.7 (1.2 – 17.9)    | Increase  | 0.1 (-4.8 – 4.8)  | Uncertain | 0.5 (-2.5 – 4.4)   | Uncertain |
| Koulikoro | Koulikoro | No ORT   | -11.1 (-15.7 – -4.2) | Decrease  | -0.4 (-3.2 – 1.9) | Uncertain | -0.6 (-2.6 – 0.5)  | Uncertain |
| Koulikoro | Nara      | Any ORS  | 2.2 (-1.7 – 8.5)     | Uncertain | 0.1 (-3 – 3.1)    | Uncertain | -0.5 (-3 – 1.7)    | Uncertain |
| Koulikoro | Nara      | Only RHF | -1.3 (-9.3 – 4.5)    | Uncertain | -0.1 (-3.8 – 3.7) | Uncertain | 1.2 (-1.6 – 4.4)   | Uncertain |
| Koulikoro | Nara      | No ORT   | -0.9 (-4.8 – 4.6)    | Uncertain | 0 (-2.3 – 2.5)    | Uncertain | -0.7 (-2.9 – 0.8)  | Uncertain |
| Sikasso   | Bougouni  | Any ORS  | 1 (-3.6 – 8.4)       | Uncertain | 0.7 (-3 – 4.2)    | Uncertain | 0.4 (-3 – 3.2)     | Uncertain |
| Sikasso   | Bougouni  | Only RHF | 0.5 (-8.5 – 6.8)     | Uncertain | -1.3 (-5.6 – 3.5) | Uncertain | 1.3 (-2.1 – 5.1)   | Uncertain |
| Sikasso   | Bougouni  | No ORT   | -1.5 (-5.1 – 4.2)    | Uncertain | 0.6 (-2.2 – 3.5)  | Uncertain | -1.7 (-4.4 – -0.1) | Decrease  |

|         |            |          |                    |           |                   |           |                    |           |
|---------|------------|----------|--------------------|-----------|-------------------|-----------|--------------------|-----------|
| Sikasso | Kadiolo    | Any ORS  | -3.2 (-8.9 – 6.2)  | Uncertain | -0.1 (-4.3 – 3.7) | Uncertain | 0.9 (-2.6 – 3.9)   | Uncertain |
| Sikasso | Kadiolo    | Only RHF | 4.2 (-6.5 – 12)    | Uncertain | -0.2 (-5.3 – 5.2) | Uncertain | 0.5 (-3.3 – 5)     | Uncertain |
| Sikasso | Kadiolo    | No ORT   | -1 (-4.9 – 6.1)    | Uncertain | 0.3 (-3.2 – 3.8)  | Uncertain | -1.4 (-4.4 – 0.3)  | Uncertain |
| Sikasso | Kolondiéba | Any ORS  | -1.1 (-6.4 – 6.7)  | Uncertain | 0.7 (-3.3 – 4.4)  | Uncertain | 1 (-3 – 4)         | Uncertain |
| Sikasso | Kolondiéba | Only RHF | 2.5 (-7 – 9.3)     | Uncertain | -1.3 (-6.1 – 3.8) | Uncertain | 0.6 (-3.2 – 5.1)   | Uncertain |
| Sikasso | Kolondiéba | No ORT   | -1.4 (-5.3 – 5)    | Uncertain | 0.6 (-2.7 – 3.8)  | Uncertain | -1.6 (-4.5 – 0.1)  | Uncertain |
| Sikasso | Koutiala   | Any ORS  | -0.3 (-5.6 – 8.2)  | Uncertain | 0.3 (-3.8 – 4.4)  | Uncertain | 1.3 (-2.4 – 4.1)   | Uncertain |
| Sikasso | Koutiala   | Only RHF | 0.9 (-9.2 – 8.3)   | Uncertain | -0.7 (-6.1 – 4.5) | Uncertain | -0.7 (-4.4 – 3.7)  | Uncertain |
| Sikasso | Koutiala   | No ORT   | -0.6 (-4.6 – 5.6)  | Uncertain | 0.4 (-2.7 – 3.6)  | Uncertain | -0.6 (-3.5 – 1.2)  | Uncertain |
| Sikasso | Sikasso    | Any ORS  | 0.2 (-5.1 – 8.6)   | Uncertain | 0.4 (-3.8 – 4.3)  | Uncertain | 0.1 (-3.6 – 2.9)   | Uncertain |
| Sikasso | Sikasso    | Only RHF | 0.1 (-9.8 – 7.3)   | Uncertain | -1.4 (-6.3 – 3.9) | Uncertain | 2 (-1.7 – 6.3)     | Uncertain |
| Sikasso | Sikasso    | No ORT   | -0.3 (-3.9 – 6.4)  | Uncertain | 1 (-2.6 – 4.8)    | Uncertain | -2.1 (-5.4 – -0.2) | Decrease  |
| Sikasso | Yanfolila  | Any ORS  | 3.2 (-1.5 – 10.4)  | Uncertain | 1.1 (-2.9 – 4.9)  | Uncertain | -0.1 (-4 – 3.3)    | Uncertain |
| Sikasso | Yanfolila  | Only RHF | -4.4 (-14.6 – 2.4) | Uncertain | -1.6 (-6.4 – 3.7) | Uncertain | 1.6 (-2.4 – 6.4)   | Uncertain |
| Sikasso | Yanfolila  | No ORT   | 1.2 (-2.3 – 7.6)   | Uncertain | 0.5 (-2.5 – 3.8)  | Uncertain | -1.5 (-4.7 – 0.3)  | Uncertain |
| Sikasso | Yorosso    | Any ORS  | 1.1 (-4.2 – 9.9)   | Uncertain | 0.4 (-4.1 – 4.8)  | Uncertain | 1 (-3.1 – 4)       | Uncertain |
| Sikasso | Yorosso    | Only RHF | -2.5 (-13 – 4.6)   | Uncertain | -1.3 (-6.6 – 4.5) | Uncertain | 1 (-3.1 – 5.8)     | Uncertain |
| Sikasso | Yorosso    | No ORT   | 1.4 (-2.4 – 8.4)   | Uncertain | 0.9 (-2.7 – 4.5)  | Uncertain | -2 (-5.4 – 0)      | Uncertain |
| Ségou   | Barouéli   | Any ORS  | -0.3 (-5.1 – 7.2)  | Uncertain | 0.8 (-3 – 4.9)    | Uncertain | -0.2 (-3.9 – 2.5)  | Uncertain |
| Ségou   | Barouéli   | Only RHF | 6.4 (-4 – 13.3)    | Uncertain | -0.4 (-5.3 – 4.7) | Uncertain | -0.7 (-3.9 – 3.6)  | Uncertain |
| Ségou   | Barouéli   | No ORT   | -6.1 (-10.7 – 0.1) | Uncertain | -0.4 (-3.5 – 2.2) | Uncertain | 0.8 (-1.2 – 2.4)   | Uncertain |
| Ségou   | Bla        | Any ORS  | -1.9 (-7.2 – 6.1)  | Uncertain | 0.2 (-3.7 – 3.9)  | Uncertain | 1.2 (-2.2 – 3.5)   | Uncertain |
| Ségou   | Bla        | Only RHF | 2.6 (-6.9 – 10.2)  | Uncertain | -0.1 (-5 – 4.8)   | Uncertain | -2.6 (-5.5 – 1.7)  | Uncertain |
| Ségou   | Bla        | No ORT   | -0.7 (-4.9 – 5.3)  | Uncertain | -0.1 (-3 – 2.6)   | Uncertain | 1.4 (-1.1 – 3.2)   | Uncertain |
| Ségou   | Macina     | Any ORS  | 1.5 (-3.5 – 9.5)   | Uncertain | 0.4 (-3.6 – 4.4)  | Uncertain | 0.5 (-3.1 – 3.1)   | Uncertain |
| Ségou   | Macina     | Only RHF | -2.2 (-12.7 – 5.2) | Uncertain | -0.4 (-5.6 – 4.7) | Uncertain | 0.1 (-3.2 – 4)     | Uncertain |
| Ségou   | Macina     | No ORT   | 0.7 (-3.4 – 7.1)   | Uncertain | 0.1 (-3.1 – 3.1)  | Uncertain | -0.6 (-3.3 – 1)    | Uncertain |
| Ségou   | Niono      | Any ORS  | 2 (-3 – 10.7)      | Uncertain | 0.8 (-3.5 – 5)    | Uncertain | 1.9 (-2.2 – 5)     | Uncertain |
| Ségou   | Niono      | Only RHF | -1 (-11.9 – 5.8)   | Uncertain | -0.6 (-5.5 – 4.9) | Uncertain | -2.2 (-5.9 – 2.2)  | Uncertain |

|       |          |          |                    |           |                   |           |                   |           |
|-------|----------|----------|--------------------|-----------|-------------------|-----------|-------------------|-----------|
| Ségou | Niono    | No ORT   | -1 (-5.1 – 5.9)    | Uncertain | -0.3 (-3.2 – 2.3) | Uncertain | 0.3 (-2.1 – 2.1)  | Uncertain |
| Ségou | San      | Any ORS  | 0.8 (-4.3 – 8.6)   | Uncertain | 0 (-3.7 – 3.8)    | Uncertain | 0 (-3.2 – 2.3)    | Uncertain |
| Ségou | San      | Only RHF | -2.3 (-11.5 – 4.6) | Uncertain | -0.1 (-5.3 – 4.5) | Uncertain | 1.1 (-1.9 – 5.3)  | Uncertain |
| Ségou | San      | No ORT   | 1.5 (-1.9 – 7.9)   | Uncertain | 0.1 (-3 – 3.3)    | Uncertain | -1.1 (-3.7 – 0.3) | Uncertain |
| Ségou | Ségou    | Any ORS  | -0.4 (-5.7 – 7.4)  | Uncertain | 0.6 (-3.3 – 4.7)  | Uncertain | 0.2 (-3.5 – 2.7)  | Uncertain |
| Ségou | Ségou    | Only RHF | 1.2 (-8.5 – 8.8)   | Uncertain | -0.5 (-5.5 – 4.5) | Uncertain | -2.1 (-5.1 – 2.4) | Uncertain |
| Ségou | Ségou    | No ORT   | -0.8 (-5.1 – 6.6)  | Uncertain | -0.2 (-3.4 – 2.7) | Uncertain | 1.9 (-0.6 – 3.5)  | Uncertain |
| Ségou | Tominian | Any ORS  | 2.2 (-1.9 – 9.3)   | Uncertain | 0.2 (-3.5 – 3.7)  | Uncertain | -0.1 (-3.2 – 2.1) | Uncertain |
| Ségou | Tominian | Only RHF | -4.2 (-12.9 – 2.1) | Uncertain | -0.3 (-5 – 4.4)   | Uncertain | 1.4 (-1.6 – 5.5)  | Uncertain |
| Ségou | Tominian | No ORT   | 2 (-1.3 – 8.3)     | Uncertain | 0.2 (-3 – 3.1)    | Uncertain | -1.3 (-3.9 – 0.1) | Uncertain |

665  
666

667 **c) Senegal**

668 Average yearly change in treatment coverage by Region, Department, Treatment (Any ORS, Only RHF, and No ORT) for three time periods.  
 669 Estimates are shown as percentage change per year in the format: mean (2.5%–97.5% uncertainty interval). The Change column indicates whether  
 670 there was a greater than 95% posterior probability of increase or decrease in each time period. Groups and time periods correspond to those presented  
 671 in Figure 4.  
 672

| Group    | Region      | Department    | Treatment | 2000 – 2006        | Change    | 2006 – 2012       | Change    | 2012 – 2017       | Change    |
|----------|-------------|---------------|-----------|--------------------|-----------|-------------------|-----------|-------------------|-----------|
| Northern | Louga       | Kébémér       | Any ORS   | 1.9 (0.7 – 3.1)    | Increase  | 0.3 (-1.1 – 1.8)  | Uncertain | 0.1 (-1.6 – 1.7)  | Uncertain |
|          | Louga       | Kébémér       | Only RHF  | 2.1 (0.4 – 3.6)    | Increase  | 0.1 (-1.6 – 1.7)  | Uncertain | 0.2 (-1.6 – 2)    | Uncertain |
|          | Louga       | Kébémér       | No ORT    | -3.9 (-5 – -2.8)   | Decrease  | -0.4 (-1.1 – 0.2) | Uncertain | -0.3 (-0.8 – 0.2) | Uncertain |
|          | Louga       | Linguère      | Any ORS   | 1.4 (0.3 – 2.6)    | Increase  | 0.2 (-1.1 – 1.3)  | Uncertain | 0.8 (-0.8 – 2.2)  | Uncertain |
|          | Louga       | Linguère      | Only RHF  | 2.1 (0.7 – 3.7)    | Increase  | 0.2 (-1.1 – 1.6)  | Uncertain | -0.6 (-2.2 – 1.1) | Uncertain |
|          | Louga       | Linguère      | No ORT    | -3.5 (-4.6 – -2.5) | Decrease  | -0.4 (-1 – 0.1)   | Uncertain | -0.2 (-0.6 – 0.1) | Uncertain |
|          | Louga       | Louga         | Any ORS   | 1.8 (0.5 – 3)      | Increase  | 0.4 (-1.1 – 1.9)  | Uncertain | 0.3 (-1.4 – 2)    | Uncertain |
|          | Louga       | Louga         | Only RHF  | 1.6 (-0.1 – 3.2)   | Uncertain | 0.1 (-1.6 – 1.7)  | Uncertain | 0 (-1.9 – 1.9)    | Uncertain |
|          | Louga       | Louga         | No ORT    | -3.4 (-4.5 – -2.3) | Decrease  | -0.4 (-1.1 – 0.2) | Uncertain | -0.3 (-0.8 – 0.1) | Uncertain |
|          | Matam       | Kanel         | Any ORS   | 1.7 (0.4 – 3)      | Increase  | 0 (-1.5 – 1.4)    | Uncertain | 1.1 (-0.7 – 2.7)  | Uncertain |
|          | Matam       | Kanel         | Only RHF  | 2.4 (0.8 – 4.2)    | Increase  | 0.6 (-1 – 2.2)    | Uncertain | -0.9 (-2.6 – 1.1) | Uncertain |
|          | Matam       | Kanel         | No ORT    | -4.2 (-5.5 – -2.9) | Decrease  | -0.5 (-1.2 – 0)   | Uncertain | -0.2 (-0.7 – 0.1) | Uncertain |
|          | Matam       | Matam         | Any ORS   | 1.9 (0.6 – 3.3)    | Increase  | -0.2 (-1.6 – 1.4) | Uncertain | 1.2 (-0.6 – 3)    | Uncertain |
|          | Matam       | Matam         | Only RHF  | 2 (0.2 – 3.8)      | Increase  | 0.6 (-1.2 – 2.2)  | Uncertain | -1 (-2.9 – 0.9)   | Uncertain |
|          | Matam       | Matam         | No ORT    | -3.9 (-5.1 – -2.6) | Decrease  | -0.4 (-1 – 0.1)   | Uncertain | -0.2 (-0.6 – 0.1) | Uncertain |
|          | Matam       | Ranéroú Ferlo | Any ORS   | 1.3 (0.1 – 2.4)    | Increase  | 0.2 (-1 – 1.4)    | Uncertain | 0.9 (-0.6 – 2.5)  | Uncertain |
|          | Matam       | Ranéroú Ferlo | Only RHF  | 2.8 (1.3 – 4.5)    | Increase  | 0.2 (-1.2 – 1.6)  | Uncertain | -0.7 (-2.3 – 0.9) | Uncertain |
|          | Matam       | Ranéroú Ferlo | No ORT    | -4.1 (-5.4 – -3)   | Decrease  | -0.4 (-1 – 0.1)   | Uncertain | -0.2 (-0.6 – 0.1) | Uncertain |
|          | Saint-Louis | Dagana        | Any ORS   | 1.8 (0.6 – 3)      | Increase  | 0.5 (-1.1 – 1.9)  | Uncertain | 0.6 (-1.3 – 2.4)  | Uncertain |
|          | Saint-Louis | Dagana        | Only RHF  | 1.9 (0.2 – 3.4)    | Increase  | -0.1 (-1.7 – 1.6) | Uncertain | -0.3 (-2.3 – 1.7) | Uncertain |
|          | Saint-Louis | Dagana        | No ORT    | -3.7 (-4.8 – -2.5) | Decrease  | -0.4 (-1 – 0.2)   | Uncertain | -0.3 (-0.8 – 0.1) | Uncertain |
|          | Saint-Louis | Podor         | Any ORS   | 1.6 (0.6 – 2.7)    | Increase  | 0.2 (-1 – 1.5)    | Uncertain | 0.9 (-0.7 – 2.5)  | Uncertain |
|          | Saint-Louis | Podor         | Only RHF  | 2.1 (0.5 – 3.7)    | Increase  | 0.1 (-1.3 – 1.5)  | Uncertain | -0.7 (-2.3 – 1.1) | Uncertain |



|                |             |             |          |                    |           |                   |           |                   |           |
|----------------|-------------|-------------|----------|--------------------|-----------|-------------------|-----------|-------------------|-----------|
|                | Saint-Louis | Podor       | No ORT   | -3.7 (-4.9 – -2.7) | Decrease  | -0.4 (-0.9 – 0.1) | Uncertain | -0.2 (-0.6 – 0.1) | Uncertain |
|                | Saint-Louis | Saint-Louis | Any ORS  | 1.8 (0.2 – 3.5)    | Increase  | 0.3 (-1.6 – 2.3)  | Uncertain | 0.5 (-1.9 – 2.9)  | Uncertain |
|                | Saint-Louis | Saint-Louis | Only RHF | 1.7 (-0.6 – 3.9)   | Uncertain | 0 (-2.3 – 2.1)    | Uncertain | -0.1 (-2.6 – 2.4) | Uncertain |
|                | Saint-Louis | Saint-Louis | No ORT   | -3.5 (-5 – -2)     | Decrease  | -0.3 (-1.1 – 0.4) | Uncertain | -0.4 (-1.1 – 0.1) | Uncertain |
| <b>Central</b> | Dakar       | Dakar       | Any ORS  | 1.5 (-0.4 – 3.6)   | Uncertain | 0.1 (-2.1 – 2.3)  | Uncertain | 0.8 (-1.8 – 3.5)  | Uncertain |
|                | Dakar       | Dakar       | Only RHF | 3.5 (0.5 – 6.4)    | Increase  | 0.4 (-1.9 – 3)    | Uncertain | -0.6 (-3.5 – 2.3) | Uncertain |
|                | Dakar       | Dakar       | No ORT   | -5.1 (-7.2 – -3)   | Decrease  | -0.6 (-1.6 – 0.3) | Uncertain | -0.2 (-1.1 – 0.4) | Uncertain |
|                | Dakar       | Guédiawaye  | Any ORS  | 1.5 (-0.6 – 3.7)   | Uncertain | 0.1 (-2.3 – 2.6)  | Uncertain | 1.2 (-1.9 – 4.5)  | Uncertain |
|                | Dakar       | Guédiawaye  | Only RHF | 3.5 (0.1 – 6.6)    | Increase  | 0.5 (-2.5 – 3.2)  | Uncertain | -1 (-4.7 – 2.4)   | Uncertain |
|                | Dakar       | Guédiawaye  | No ORT   | -5.1 (-7.4 – -2.8) | Decrease  | -0.6 (-1.7 – 0.4) | Uncertain | -0.2 (-1.2 – 0.8) | Uncertain |
|                | Dakar       | Pikine      | Any ORS  | 1.7 (-0.1 – 3.7)   | Uncertain | 0.1 (-2 – 2.1)    | Uncertain | 1.2 (-1.6 – 4)    | Uncertain |
|                | Dakar       | Pikine      | Only RHF | 3.4 (0.7 – 5.9)    | Increase  | 0.4 (-2 – 2.8)    | Uncertain | -1 (-4.1 – 2)     | Uncertain |
|                | Dakar       | Pikine      | No ORT   | -5.1 (-6.9 – -3.3) | Decrease  | -0.6 (-1.6 – 0.4) | Uncertain | -0.2 (-1.1 – 0.5) | Uncertain |
|                | Dakar       | Rufisque    | Any ORS  | 2.2 (0.6 – 4)      | Increase  | 0.4 (-1.6 – 2.3)  | Uncertain | 0.8 (-1.6 – 3.2)  | Uncertain |
|                | Dakar       | Rufisque    | Only RHF | 2.9 (0.4 – 5.2)    | Increase  | 0.3 (-1.9 – 2.6)  | Uncertain | -0.4 (-3 – 2.3)   | Uncertain |
|                | Dakar       | Rufisque    | No ORT   | -5.1 (-7 – -3.4)   | Decrease  | -0.7 (-2 – 0.4)   | Uncertain | -0.4 (-1.4 – 0.5) | Uncertain |
|                | Diourbel    | Bambey      | Any ORS  | 1.7 (0.4 – 3.1)    | Increase  | 0.4 (-1.2 – 2)    | Uncertain | 0.5 (-1.3 – 2.4)  | Uncertain |
|                | Diourbel    | Bambey      | Only RHF | 3.4 (1.4 – 5.2)    | Increase  | 0 (-1.8 – 1.9)    | Uncertain | -0.4 (-2.5 – 1.7) | Uncertain |
|                | Diourbel    | Bambey      | No ORT   | -5.1 (-6.3 – -3.9) | Decrease  | -0.4 (-1.2 – 0.2) | Uncertain | -0.1 (-0.7 – 0.4) | Uncertain |
|                | Diourbel    | Diourbel    | Any ORS  | 1.7 (0.4 – 3.1)    | Increase  | 0.3 (-1.4 – 1.9)  | Uncertain | 0.4 (-1.4 – 2.3)  | Uncertain |
|                | Diourbel    | Diourbel    | Only RHF | 3.1 (1 – 5)        | Increase  | 0.2 (-1.5 – 2.2)  | Uncertain | -0.3 (-2.4 – 1.7) | Uncertain |
|                | Diourbel    | Diourbel    | No ORT   | -4.8 (-6.1 – -3.5) | Decrease  | -0.5 (-1.4 – 0.2) | Uncertain | -0.1 (-0.7 – 0.5) | Uncertain |
|                | Diourbel    | Mbacké      | Any ORS  | 1.6 (0.4 – 3)      | Increase  | 0.2 (-1.3 – 1.7)  | Uncertain | 0.4 (-1.4 – 2.1)  | Uncertain |
|                | Diourbel    | Mbacké      | Only RHF | 2.9 (1 – 4.7)      | Increase  | 0.3 (-1.5 – 2)    | Uncertain | -0.2 (-2.1 – 1.7) | Uncertain |
|                | Diourbel    | Mbacké      | No ORT   | -4.5 (-5.8 – -3.3) | Decrease  | -0.5 (-1.3 – 0.3) | Uncertain | -0.1 (-0.8 – 0.4) | Uncertain |
|                | Fatick      | Fatick      | Any ORS  | 1.7 (0.4 – 3)      | Increase  | 0.3 (-1.3 – 1.9)  | Uncertain | 0.7 (-1.2 – 2.5)  | Uncertain |
|                | Fatick      | Fatick      | Only RHF | 3.1 (1.3 – 4.7)    | Increase  | 0.1 (-1.6 – 1.9)  | Uncertain | -0.6 (-2.6 – 1.4) | Uncertain |
|                | Fatick      | Fatick      | No ORT   | -4.8 (-5.9 – -3.6) | Decrease  | -0.4 (-1.1 – 0.1) | Uncertain | -0.1 (-0.6 – 0.4) | Uncertain |
|                | Fatick      | Foundiougne | Any ORS  | 1.4 (-0.1 – 2.9)   | Uncertain | 0.4 (-1.3 – 2.1)  | Uncertain | 0.6 (-1.3 – 2.5)  | Uncertain |

|          |              |          |                    |           |                   |           |                   |           |
|----------|--------------|----------|--------------------|-----------|-------------------|-----------|-------------------|-----------|
| Fatick   | Foundiougne  | Only RHF | 3 (1.3 – 4.8)      | Increase  | 0 (-1.8 – 1.9)    | Uncertain | -0.4 (-2.5 – 1.7) | Uncertain |
| Fatick   | Foundiougne  | No ORT   | -4.5 (-5.8 – -3.2) | Decrease  | -0.5 (-1.2 – 0.1) | Uncertain | -0.2 (-0.7 – 0.3) | Uncertain |
| Fatick   | Gossas       | Any ORS  | 1.5 (0.2 – 2.9)    | Increase  | 0.2 (-1.4 – 1.7)  | Uncertain | 0.6 (-1.2 – 2.3)  | Uncertain |
| Fatick   | Gossas       | Only RHF | 3.1 (1.2 – 5)      | Increase  | 0.3 (-1.4 – 2.1)  | Uncertain | -0.5 (-2.4 – 1.5) | Uncertain |
| Fatick   | Gossas       | No ORT   | -4.6 (-5.9 – -3.3) | Decrease  | -0.5 (-1.2 – 0.1) | Uncertain | -0.1 (-0.7 – 0.4) | Uncertain |
| Kaffrine | Birkilane    | Any ORS  | 1.4 (0 – 2.8)      | Uncertain | 0.2 (-1.5 – 1.9)  | Uncertain | 0.3 (-1.6 – 2.3)  | Uncertain |
| Kaffrine | Birkilane    | Only RHF | 2.9 (0.9 – 4.8)    | Increase  | 0.3 (-1.6 – 2.2)  | Uncertain | -0.1 (-2.1 – 1.9) | Uncertain |
| Kaffrine | Birkilane    | No ORT   | -4.3 (-5.6 – -2.9) | Decrease  | -0.5 (-1.3 – 0.1) | Uncertain | -0.2 (-0.8 – 0.2) | Uncertain |
| Kaffrine | Kaffrine     | Any ORS  | 1.3 (0 – 2.7)      | Increase  | 0.3 (-1.3 – 1.9)  | Uncertain | 0.3 (-1.4 – 2)    | Uncertain |
| Kaffrine | Kaffrine     | Only RHF | 3 (1.2 – 4.7)      | Increase  | 0.3 (-1.5 – 2)    | Uncertain | -0.1 (-1.9 – 1.8) | Uncertain |
| Kaffrine | Kaffrine     | No ORT   | -4.3 (-5.6 – -3)   | Decrease  | -0.5 (-1.3 – 0.1) | Uncertain | -0.2 (-0.8 – 0.2) | Uncertain |
| Kaffrine | Koungheul    | Any ORS  | 1.2 (-0.1 – 2.5)   | Uncertain | 0.4 (-1.2 – 1.9)  | Uncertain | 0.4 (-1.3 – 2.1)  | Uncertain |
| Kaffrine | Koungheul    | Only RHF | 3.3 (1.5 – 5.1)    | Increase  | 0.1 (-1.5 – 1.8)  | Uncertain | -0.2 (-2 – 1.7)   | Uncertain |
| Kaffrine | Koungheul    | No ORT   | -4.5 (-5.8 – -3.2) | Decrease  | -0.5 (-1.2 – 0.2) | Uncertain | -0.3 (-0.8 – 0.1) | Uncertain |
| Kaffrine | Malème Hodar | Any ORS  | 1.3 (0.1 – 2.6)    | Increase  | 0.2 (-1.2 – 1.7)  | Uncertain | 0.4 (-1.2 – 2.1)  | Uncertain |
| Kaffrine | Malème Hodar | Only RHF | 3 (1.2 – 4.6)      | Increase  | 0.3 (-1.4 – 2)    | Uncertain | -0.2 (-2 – 1.6)   | Uncertain |
| Kaffrine | Malème Hodar | No ORT   | -4.3 (-5.5 – -3)   | Decrease  | -0.5 (-1.3 – 0.1) | Uncertain | -0.2 (-0.8 – 0.2) | Uncertain |
| Kaolack  | Guinguinéo   | Any ORS  | 1.5 (0 – 3)        | Increase  | 0.2 (-1.5 – 1.9)  | Uncertain | 0.6 (-1.2 – 2.5)  | Uncertain |
| Kaolack  | Guinguinéo   | Only RHF | 3.1 (1.1 – 5)      | Increase  | 0.3 (-1.5 – 2.2)  | Uncertain | -0.5 (-2.5 – 1.6) | Uncertain |
| Kaolack  | Guinguinéo   | No ORT   | -4.6 (-5.9 – -3.2) | Decrease  | -0.5 (-1.2 – 0.1) | Uncertain | -0.1 (-0.7 – 0.3) | Uncertain |
| Kaolack  | Kaolack      | Any ORS  | 1.6 (0.1 – 3.2)    | Increase  | 0.3 (-1.5 – 2)    | Uncertain | 0.5 (-1.4 – 2.5)  | Uncertain |
| Kaolack  | Kaolack      | Only RHF | 3 (1 – 4.8)        | Increase  | 0.2 (-1.7 – 2.2)  | Uncertain | -0.4 (-2.4 – 1.8) | Uncertain |
| Kaolack  | Kaolack      | No ORT   | -4.6 (-5.9 – -3.3) | Decrease  | -0.5 (-1.3 – 0.1) | Uncertain | -0.2 (-0.8 – 0.4) | Uncertain |
| Kaolack  | Nioro du Rip | Any ORS  | 1.3 (-0.2 – 2.7)   | Uncertain | 0.3 (-1.2 – 1.9)  | Uncertain | 0.2 (-1.5 – 1.9)  | Uncertain |
| Kaolack  | Nioro du Rip | Only RHF | 3.1 (1.3 – 5)      | Increase  | 0.2 (-1.7 – 1.9)  | Uncertain | 0 (-1.8 – 1.9)    | Uncertain |
| Kaolack  | Nioro du Rip | No ORT   | -4.4 (-5.6 – -3.1) | Decrease  | -0.5 (-1.3 – 0.1) | Uncertain | -0.3 (-0.8 – 0.2) | Uncertain |
| Kolda    | Kolda        | Any ORS  | 1.4 (-0.2 – 2.9)   | Uncertain | 0.3 (-1.2 – 1.9)  | Uncertain | 0.3 (-1.6 – 2.1)  | Uncertain |
| Kolda    | Kolda        | Only RHF | 3.9 (2.1 – 5.7)    | Increase  | 0.1 (-1.7 – 1.9)  | Uncertain | 0 (-1.9 – 2)      | Uncertain |
| Kolda    | Kolda        | No ORT   | -5.3 (-6.7 – -4)   | Decrease  | -0.4 (-1.1 – 0.2) | Uncertain | -0.3 (-0.8 – 0.1) | Uncertain |

|             |                   |          |                    |           |                   |           |                   |           |
|-------------|-------------------|----------|--------------------|-----------|-------------------|-----------|-------------------|-----------|
| Kolda       | Médina Yoro Foula | Any ORS  | 1.1 (-0.3 – 2.6)   | Uncertain | 0.4 (-1.1 – 1.9)  | Uncertain | 0.3 (-1.5 – 1.9)  | Uncertain |
| Kolda       | Médina Yoro Foula | Only RHF | 3.7 (2 – 5.4)      | Increase  | 0.1 (-1.7 – 1.7)  | Uncertain | 0 (-1.8 – 2)      | Uncertain |
| Kolda       | Médina Yoro Foula | No ORT   | -4.9 (-6.2 – -3.6) | Decrease  | -0.4 (-1.1 – 0.1) | Uncertain | -0.3 (-0.8 – 0.1) | Uncertain |
| Kolda       | Vélingara         | Any ORS  | 1.4 (0 – 2.9)      | Increase  | 0.3 (-1.3 – 1.7)  | Uncertain | 0.4 (-1.5 – 2.1)  | Uncertain |
| Kolda       | Vélingara         | Only RHF | 3.9 (1.9 – 5.7)    | Increase  | 0 (-1.5 – 1.7)    | Uncertain | -0.1 (-2.1 – 1.9) | Uncertain |
| Kolda       | Vélingara         | No ORT   | -5.3 (-6.6 – -4)   | Decrease  | -0.3 (-0.9 – 0.2) | Uncertain | -0.3 (-0.8 – 0.1) | Uncertain |
| Kédougou    | Kédougou          | Any ORS  | 1.5 (0 – 2.9)      | Increase  | 0.3 (-1.4 – 1.8)  | Uncertain | 0.4 (-1.5 – 2.2)  | Uncertain |
| Kédougou    | Kédougou          | Only RHF | 3.5 (1.6 – 5.3)    | Increase  | 0.1 (-1.6 – 2)    | Uncertain | -0.1 (-2.1 – 1.9) | Uncertain |
| Kédougou    | Kédougou          | No ORT   | -4.9 (-6.4 – -3.5) | Decrease  | -0.4 (-1 – 0.1)   | Uncertain | -0.3 (-0.7 – 0.1) | Uncertain |
| Kédougou    | Salémata          | Any ORS  | 1.5 (-0.1 – 2.9)   | Uncertain | 0.3 (-1.3 – 2)    | Uncertain | 0.4 (-1.8 – 2.3)  | Uncertain |
| Kédougou    | Salémata          | Only RHF | 3.5 (1.4 – 5.5)    | Increase  | 0.1 (-1.8 – 1.9)  | Uncertain | -0.1 (-2.1 – 2.1) | Uncertain |
| Kédougou    | Salémata          | No ORT   | -5 (-6.6 – -3.5)   | Decrease  | -0.4 (-1.1 – 0.2) | Uncertain | -0.3 (-0.8 – 0.1) | Uncertain |
| Kédougou    | Saraya            | Any ORS  | 1.4 (0 – 2.7)      | Increase  | 0.3 (-1.2 – 1.7)  | Uncertain | 0.4 (-1.4 – 2.2)  | Uncertain |
| Kédougou    | Saraya            | Only RHF | 3.5 (1.8 – 5.4)    | Increase  | 0.1 (-1.5 – 1.7)  | Uncertain | -0.1 (-2 – 1.8)   | Uncertain |
| Kédougou    | Saraya            | No ORT   | -4.9 (-6.3 – -3.6) | Decrease  | -0.4 (-1.1 – 0.2) | Uncertain | -0.3 (-0.8 – 0.1) | Uncertain |
| Tambacounda | Bakel             | Any ORS  | 1.4 (0.3 – 2.6)    | Increase  | 0.2 (-1.2 – 1.6)  | Uncertain | 0.5 (-1 – 2.1)    | Uncertain |
| Tambacounda | Bakel             | Only RHF | 3.4 (1.8 – 5)      | Increase  | 0.1 (-1.3 – 1.7)  | Uncertain | -0.3 (-2 – 1.4)   | Uncertain |
| Tambacounda | Bakel             | No ORT   | -4.8 (-6 – -3.6)   | Decrease  | -0.4 (-1 – 0.1)   | Uncertain | -0.3 (-0.7 – 0.1) | Uncertain |
| Tambacounda | Goudiry           | Any ORS  | 1.2 (0.1 – 2.4)    | Increase  | 0.3 (-0.9 – 1.5)  | Uncertain | 0.5 (-1 – 1.9)    | Uncertain |
| Tambacounda | Goudiry           | Only RHF | 3.8 (2.2 – 5.4)    | Increase  | 0.1 (-1.3 – 1.5)  | Uncertain | -0.2 (-1.8 – 1.4) | Uncertain |
| Tambacounda | Goudiry           | No ORT   | -5 (-6.2 – -3.9)   | Decrease  | -0.3 (-0.9 – 0.1) | Uncertain | -0.3 (-0.7 – 0.1) | Uncertain |
| Tambacounda | Koupendoum        | Any ORS  | 1.1 (-0.2 – 2.4)   | Uncertain | 0.4 (-1 – 1.8)    | Uncertain | 0.5 (-1.2 – 2.2)  | Uncertain |
| Tambacounda | Koupendoum        | Only RHF | 3.7 (1.9 – 5.3)    | Increase  | 0.1 (-1.5 – 1.6)  | Uncertain | -0.3 (-2.1 – 1.5) | Uncertain |
| Tambacounda | Koupendoum        | No ORT   | -4.8 (-6.1 – -3.6) | Decrease  | -0.4 (-1.1 – 0.1) | Uncertain | -0.2 (-0.7 – 0.1) | Uncertain |
| Tambacounda | Tambacounda       | Any ORS  | 1.3 (0.1 – 2.5)    | Increase  | 0.3 (-1 – 1.5)    | Uncertain | 0.5 (-1.1 – 1.9)  | Uncertain |
| Tambacounda | Tambacounda       | Only RHF | 3.8 (2.2 – 5.4)    | Increase  | 0.1 (-1.3 – 1.4)  | Uncertain | -0.2 (-1.8 – 1.5) | Uncertain |
| Tambacounda | Tambacounda       | No ORT   | -5.1 (-6.3 – -4)   | Decrease  | -0.3 (-0.9 – 0.1) | Uncertain | -0.3 (-0.7 – 0.1) | Uncertain |
| Thiès       | Mbour             | Any ORS  | 1.6 (0.3 – 3.1)    | Increase  | 0.3 (-1.4 – 2)    | Uncertain | 0.7 (-1.2 – 2.6)  | Uncertain |
| Thiès       | Mbour             | Only RHF | 3.5 (1.7 – 5.4)    | Increase  | 0.2 (-1.7 – 2)    | Uncertain | -0.6 (-2.7 – 1.5) | Uncertain |

|                 |            |            |          |                    |           |                   |           |                   |           |
|-----------------|------------|------------|----------|--------------------|-----------|-------------------|-----------|-------------------|-----------|
|                 | Thiès      | Mbour      | No ORT   | -5.2 (-6.4 – -4)   | Decrease  | -0.5 (-1.2 – 0.2) | Uncertain | -0.2 (-0.8 – 0.3) | Uncertain |
|                 | Thiès      | Thiès      | Any ORS  | 1.7 (0.4 – 3.2)    | Increase  | 0.4 (-1.2 – 2.1)  | Uncertain | 0.6 (-1.4 – 2.6)  | Uncertain |
|                 | Thiès      | Thiès      | Only RHF | 3.5 (1.5 – 5.4)    | Increase  | 0.1 (-1.8 – 2)    | Uncertain | -0.4 (-2.6 – 1.9) | Uncertain |
|                 | Thiès      | Thiès      | No ORT   | -5.2 (-6.6 – -4)   | Decrease  | -0.5 (-1.3 – 0.3) | Uncertain | -0.2 (-0.8 – 0.4) | Uncertain |
|                 | Thiès      | Tivaouane  | Any ORS  | 1.8 (0.5 – 3.1)    | Increase  | 0.4 (-1.1 – 2)    | Uncertain | 0.3 (-1.6 – 2.1)  | Uncertain |
|                 | Thiès      | Tivaouane  | Only RHF | 2.9 (1 – 4.6)      | Increase  | 0 (-1.7 – 1.8)    | Uncertain | -0.1 (-2.1 – 1.9) | Uncertain |
|                 | Thiès      | Tivaouane  | No ORT   | -4.7 (-5.9 – -3.4) | Decrease  | -0.4 (-1.1 – 0.2) | Uncertain | -0.2 (-0.8 – 0.2) | Uncertain |
| <b>Southern</b> | Sédhiou    | Boukiling  | Any ORS  | 0.9 (-0.6 – 2.4)   | Uncertain | 0.4 (-1.1 – 2.2)  | Uncertain | 0.3 (-1.5 – 2.1)  | Uncertain |
|                 | Sédhiou    | Boukiling  | Only RHF | 3.8 (1.9 – 5.8)    | Increase  | 0.2 (-1.8 – 1.9)  | Uncertain | 0 (-1.9 – 1.9)    | Uncertain |
|                 | Sédhiou    | Boukiling  | No ORT   | -4.7 (-6 – -3.3)   | Decrease  | -0.6 (-1.4 – 0)   | Decrease  | -0.3 (-0.7 – 0.1) | Uncertain |
|                 | Sédhiou    | Goudomp    | Any ORS  | 1 (-0.4 – 2.4)     | Uncertain | 0.5 (-1 – 2.2)    | Uncertain | 0.4 (-1.7 – 2.2)  | Uncertain |
|                 | Sédhiou    | Goudomp    | Only RHF | 4.1 (1.9 – 6)      | Increase  | 0.1 (-1.8 – 1.8)  | Uncertain | -0.1 (-2.1 – 2.1) | Uncertain |
|                 | Sédhiou    | Goudomp    | No ORT   | -5.1 (-6.6 – -3.6) | Decrease  | -0.6 (-1.4 – 0)   | Uncertain | -0.3 (-0.8 – 0.1) | Uncertain |
|                 | Sédhiou    | Sédhiou    | Any ORS  | 1 (-0.4 – 2.4)     | Uncertain | 0.4 (-1.1 – 2.1)  | Uncertain | 0.4 (-1.4 – 2.2)  | Uncertain |
|                 | Sédhiou    | Sédhiou    | Only RHF | 4 (2 – 5.9)        | Increase  | 0.2 (-1.6 – 2)    | Uncertain | -0.1 (-2 – 1.9)   | Uncertain |
|                 | Sédhiou    | Sédhiou    | No ORT   | -5 (-6.4 – -3.6)   | Decrease  | -0.7 (-1.4 – 0)   | Decrease  | -0.3 (-0.7 – 0.1) | Uncertain |
|                 | Ziguinchor | Bignona    | Any ORS  | 0.7 (-0.8 – 2.3)   | Uncertain | 0.4 (-1.3 – 2.1)  | Uncertain | 0.5 (-1.3 – 2.4)  | Uncertain |
|                 | Ziguinchor | Bignona    | Only RHF | 4 (2.1 – 5.8)      | Increase  | 0.2 (-1.7 – 2.1)  | Uncertain | -0.2 (-2.2 – 1.8) | Uncertain |
|                 | Ziguinchor | Bignona    | No ORT   | -4.8 (-6.1 – -3.4) | Decrease  | -0.6 (-1.4 – 0)   | Uncertain | -0.3 (-0.8 – 0.1) | Uncertain |
|                 | Ziguinchor | Oussouye   | Any ORS  | 0.8 (-1 – 2.5)     | Uncertain | 0.5 (-1.4 – 2.5)  | Uncertain | 0.6 (-1.6 – 2.9)  | Uncertain |
|                 | Ziguinchor | Oussouye   | Only RHF | 4 (1.8 – 6.2)      | Increase  | -0.1 (-2.3 – 2.1) | Uncertain | -0.3 (-2.6 – 2.2) | Uncertain |
|                 | Ziguinchor | Oussouye   | No ORT   | -4.8 (-6.4 – -3.2) | Decrease  | -0.5 (-1.4 – 0.2) | Uncertain | -0.4 (-1 – 0.2)   | Uncertain |
|                 | Ziguinchor | Ziguinchor | Any ORS  | 0.7 (-1 – 2.4)     | Uncertain | 0.6 (-1.2 – 2.6)  | Uncertain | 0.7 (-1.5 – 2.8)  | Uncertain |
|                 | Ziguinchor | Ziguinchor | Only RHF | 4.2 (2 – 6.3)      | Increase  | 0 (-2.1 – 2.1)    | Uncertain | -0.3 (-2.7 – 2.1) | Uncertain |
|                 | Ziguinchor | Ziguinchor | No ORT   | -4.9 (-6.5 – -3.4) | Decrease  | -0.6 (-1.5 – 0.1) | Uncertain | -0.3 (-1 – 0.2)   | Uncertain |

673 **8.0 Additional file 1: References**

674

- 675 1. Munos MK, Walker CLF, Black RE. The effect of oral rehydration solution and recommended home fluids on  
676 diarrhoea mortality. *Int J Epidemiol*. 2010 Apr 1;39(Suppl 1):i75–87.
- 677 2. Wiens KE, Lindstedt PA, Blacker BF, Johnson KB, Baumann MM, Schaeffer LE, et al. Mapping  
678 geographical inequalities in oral rehydration therapy coverage in low-income and middle-income countries,  
679 2000–17. *Lancet Glob Health*. 2020 Aug 1;8(8):e1038–60.
- 680 3. Kish L. *Survey sampling*. New York: John Wiley & Sons, Inc.; 1965. 672 p.
- 681 4. WorldPop. Get data. pop\_release 2019\_08\_29. [Internet]. [cited 2017 Jul 25]. Available from:  
682 [http://www.worldpop.org.uk/data/get\\_data/](http://www.worldpop.org.uk/data/get_data/)
- 683 5. Fullman N, Yearwood J, Abay SM, Abbafati C, Abd-Allah F, Abdela J, et al. Measuring performance on the  
684 Healthcare Access and Quality Index for 195 countries and territories and selected subnational locations: a  
685 systematic analysis from the Global Burden of Disease Study 2016. *Lancet*. 2018 Jun 2;391(10136):2236–71.
- 686 6. Faraway JJ. *Linear Models with R, Chapter 4, Problems with the Predictors*. CRC Press; 2004. 83–94 p.
- 687 7. Database of Global Administrative Areas. GADM data version 3.6. Shapefile version 2019\_09\_10. [Internet].  
688 [cited 2019 Sep 10]. Available from: <https://gadm.org/data.html>
- 689 8. Bhatt S, Cameron E, Flaxman SR, Weiss DJ, Smith DL, Gething PW. Improved prediction accuracy for  
690 disease risk mapping using Gaussian process stacked generalization. *J R Soc Interface*. 2017 Sep  
691 1;14(134):20170520.
- 692 9. Head T, MechCoder, Louppe G, Shcherbatyi I, fcharras, Vinícius Z, et al. scikit-optimize/scikit-optimize:  
693 v0.5.2 [Internet]. Zenodo; 2018. Available from: <https://zenodo.org/record/1207017#.XMiMN2hKiUk>
- 694 10. Stein ML. *Interpolation of Spatial Data - Some Theory for Kriging* [Internet]. Springer; 1999. Available from:  
695 <https://www.springer.com/us/book/9780387986296>
- 696 11. Gelfand AE, Diggle PJ, Guttorp P, Fuentes M. *Handbook of Spatial Statistics* [Internet]. CRC Press; 2010.  
697 Available from: [https://www.crcpress.com/Handbook-of-Spatial-Statistics/Gelfand-Diggle-Guttorp-](https://www.crcpress.com/Handbook-of-Spatial-Statistics/Gelfand-Diggle-Guttorp-Fuentes/p/book/9781420072877)  
698 [Fuentes/p/book/9781420072877](https://www.crcpress.com/Handbook-of-Spatial-Statistics/Gelfand-Diggle-Guttorp-Fuentes/p/book/9781420072877)
- 699 12. Rue H, Martino S, Chopin N. Approximate Bayesian inference for latent Gaussian models by using integrated  
700 nested Laplace approximations. *J R Stat Soc Ser B Stat Methodol*. 2009 Apr 1;71(2):319–92.
- 701 13. Martins TG, Simpson D, Lindgren F, Rue H. Bayesian computing with INLA: new features. *CSDA*. 2013  
702 Nov 1;67:68–83.
- 703 14. Lindgren F, Rue H, Lindström J. An explicit link between Gaussian fields and Gaussian Markov random  
704 fields: the stochastic partial differential equation approach. *J R Stat Soc Ser B Stat Methodol*. 2011 Sep  
705 1;73(4):423–98.
- 706 15. Fuglstad G-A, Simpson D, Lindgren F, Rue H. Constructing Priors that Penalize the Complexity of Gaussian  
707 Random Fields. *J Am Stat Assoc*. 2019 Jan 2;114(525):445–52.
- 708 16. Dwyer-Lindgren L, Cork MA, Sligar A, Steuben KM, Wilson KF, Provost NR, et al. Mapping HIV  
709 prevalence in sub-Saharan Africa between 2000 and 2017. *Nature*. 2019 Jun;570(7760):189–93.

- 710 17. Guerin PJ, Brasher C, Baron E, Mic D, Grimont F, Ryan M, et al. Case management of a multidrug-resistant  
711 *Shigella dysenteriae* serotype 1 outbreak in a crisis context in Sierra Leone, 1999-2000. *Trans R Soc Trop*  
712 *Med Hyg.* 2004 Nov;98(11):635–43.
- 713 18. Wilson SE, Morris SS, Gilbert SS, Mosites E, Hackleman R, Weum KLM, et al. Scaling up access to oral  
714 rehydration solution for diarrhea: Learning from historical experience in low- and high-performing countries.  
715 *J Glob Health [Internet].* 2013 Jun [cited 2018 Oct 11];3(1). Available from:  
716 <https://www.ncbi.nlm.nih.gov/pmc/articles/PMC3700030/>
- 717 19. Diaz T, George AS, Rao SR, Bangura PS, Baimba JB, McMahon SA, et al. Healthcare seeking for diarrhoea,  
718 malaria and pneumonia among children in four poor rural districts in Sierra Leone in the context of free health  
719 care: results of a cross-sectional survey. *BMC Public Health.* 2013 Feb 20;13(1):157.
- 720 20. Carvajal-Vélez L, Amouzou A, Perin J, Maïga A, Tarekegn H, Akinyemi A, et al. Diarrhea management in  
721 children under five in sub-Saharan Africa: does the source of care matter? A Countdown analysis. *BMC*  
722 *Public Health.* 2016 Aug 19;16(1):830.
- 723 21. Maxmen A. Sierra Leone’s free health-care initiative: work in progress. *The Lancet.* 2013 Jan  
724 19;381(9862):191–2.
- 725 22. Groen RS, Kamara TB, Nwomeh BC, Daoh KS, Kushner AL. Free health care for under 5 year olds increases  
726 access to surgical care in Sierra Leone: an analysis of case load and patient characteristics. *World J Surg.* 2013  
727 Jun 1;37(6):1216–9.
- 728 23. McMahon SA, George AS, Yumkella F, Diaz T. Spoiled breast milk and bad water; local understandings of  
729 diarrhea causes and prevention in rural Sierra Leone. *BMC Public Health.* 2013 Dec 13;13(1):1172.
- 730 24. Sierra Leone Ministry of Health and Sanitation. Policy for Community Health Workers in Sierra Leone;  
731 [Internet]. 2012 [cited 2019 Nov 13]. Available from: [http://chwcentral.org/sites/default/files/CHW-](http://chwcentral.org/sites/default/files/CHW-Policy%20Sierra%20Leone.pdf)  
732 [Policy%20Sierra%20Leone.pdf](http://chwcentral.org/sites/default/files/CHW-Policy%20Sierra%20Leone.pdf)
- 733 25. Abdelmalak MJ, Ahmed BS, Mehta K. Health knowledge and health practices in Makeni, Sierra Leone: a  
734 community-based household survey. *Int Health.* 2016;8(3):220–6.
- 735 26. Blacklock A, Sesay A, Kamara A, Kamara M, Blacklock C. Characteristics and clinical management of  
736 patients admitted to cholera wards in a regional referral hospital during the 2012 epidemic in Sierra Leone.  
737 *Glob Health Action.* 2015;8:25266.
- 738 27. Camacho A, Kucharski A, Aki-Sawyer Y, White MA, Flasche S, Baguelin M, et al. Temporal changes in  
739 Ebola transmission in Sierra Leone and implications for control requirements: a real-time modelling study.  
740 *PLOS Curr Outbreaks [Internet].* 2015 Feb 10 [cited 2019 Dec 16]; Available from:  
741 <index.html%3Fp=55052.html>
- 742 28. Elston JWT, Moosa AJ, Moses FL, Walker G, Dotta N, Waldman R, et al. Impact of the Ebola outbreak on  
743 health systems and population health in Sierra Leone. *J Public Health.* 2015;
- 744 29. Winch PJ, Gilroy KE, Doumbia S, Patterson AE, Daou Z, Diawara A, et al. Operational issues and trends  
745 associated with the pilot introduction of zinc for childhood diarrhoea in Bougouni District, Mali. *J Health*  
746 *Popul Nutr.* 2008 Jun;26(2):151–63.
- 747 30. Ellis AA, Winch P, Daou Z, Gilroy KE, Swedberg E. Home management of childhood diarrhoea in southern  
748 Mali—Implications for the introduction of zinc treatment. *Soc Sci Med.* 2007 Feb 1;64(3):701–12.

- 749 31. Franco LM, Diop FP, Burgert CR, Kelley AG, Makinen M, Simpara CHT. Effects of mutual health  
750 organizations on use of priority health-care services in urban and rural Mali: a case-control study. *Bull World*  
751 *Health Organ.* 2008 Nov;86(11):830–8.
- 752 32. Gill S, Haynes J, Coates S. Diarrhoea dialogues from policies to progress. A call for urgent action to prevent  
753 the biggest killer of children in sub-Saharan Africa. [Internet]. [cited 2019 Nov 13]. Available from:  
754 <http://defeatdd.org/sites/default/files/node-images/DD%20low%20res%20US%20Version%20J.pdf>
- 755 33. Gibson A, Taylor P, Levine R, Fleming E, Mwebesa W, Waltensperger K, et al. MCHIP End-of-Project  
756 Report. :9.
- 757 34. The roots of Mali’s conflict [Internet]. [cited 2019 Nov 13]. Available from:  
758 [https://www.clingendael.org/pub/2015/the\\_roots\\_of\\_malis\\_conflict/2\\_rebellion\\_and\\_fragmentation\\_in\\_northern\\_mali/](https://www.clingendael.org/pub/2015/the_roots_of_malis_conflict/2_rebellion_and_fragmentation_in_northern_mali/)  
759 [rn\\_mali/](https://www.clingendael.org/pub/2015/the_roots_of_malis_conflict/2_rebellion_and_fragmentation_in_northern_mali/)
- 760 35. Mali announces far-reaching health reform - The Lancet [Internet]. [cited 2020 Jan 10]. Available from:  
761 [https://www.thelancet.com/journals/lancet/article/PIIS0140-6736\(19\)30684-1/fulltext](https://www.thelancet.com/journals/lancet/article/PIIS0140-6736(19)30684-1/fulltext)
- 762 36. Integrated community case management of childhood illness: documentation of best practices and bottlenecks  
763 to program implementation in Senegal (summary report) [Internet]. MCHIP. 2012 [cited 2019 Nov 12].  
764 Available from: [https://www.mchip.net/technical-resource/integrated-community-case-management-of-](https://www.mchip.net/technical-resource/integrated-community-case-management-of-childhood-illness-documentation-of-best-practices-and-bottlenecks-to-program-implementation-in-senegal-summary-report/)  
765 [childhood-illness-documentation-of-best-practices-and-bottlenecks-to-program-implementation-in-senegal-](https://www.mchip.net/technical-resource/integrated-community-case-management-of-childhood-illness-documentation-of-best-practices-and-bottlenecks-to-program-implementation-in-senegal-summary-report/)  
766 [summary-report/](https://www.mchip.net/technical-resource/integrated-community-case-management-of-childhood-illness-documentation-of-best-practices-and-bottlenecks-to-program-implementation-in-senegal-summary-report/)
- 767 37. Wilson SE, Morris SS, Gilbert S. ORS case study: Senegal, Bill & Melinda Gates Foundation [Internet]. 2012  
768 [cited 2020 Jan 14]. Available from:  
769 [https://www.shopsplusproject.org/sites/default/files/resources/Senegal\\_BMGF\\_ORS%20Case%20Study\\_201](https://www.shopsplusproject.org/sites/default/files/resources/Senegal_BMGF_ORS%20Case%20Study_2012.pdf)  
770 [2.pdf](https://www.shopsplusproject.org/sites/default/files/resources/Senegal_BMGF_ORS%20Case%20Study_2012.pdf)
- 771 38. Collins D, Jarrah Z, Gilmartin C, Saya U. The costs of integrated community case management (iCCM)  
772 programs: a multi-country analysis. *J Glob Health* [Internet]. 2014 Dec [cited 2019 Nov 12];4(2). Available  
773 from: <https://www.ncbi.nlm.nih.gov/pmc/articles/PMC4267093/>
- 774 39. Plan de passage a l’échelle de la prise en charge de la diarrhée chez l’enfant par le sel de réhydratation orale  
775 (SRO) a faible osmolarité et le zinc. Direction de la Santé, Division de l’Alimentation et de la Santé de  
776 l’Enfant (DANSE), Ministère de la Santé de l’Hygiène Publique et de la Prévention, Sénégal; 2011.
- 777 40. The Micronutrient Initiative, Government of Canada and Teck launch new initiative with Senegal Ministry of  
778 Health to save children’s lives - Nutrition International [Internet]. [cited 2019 Oct 29]. Available from:  
779 [https://www.nutritionintl.org/2012/05/micronutrient-initiative-government-canada-teck-launch-new-initiative-](https://www.nutritionintl.org/2012/05/micronutrient-initiative-government-canada-teck-launch-new-initiative-senegal-ministry-health-save-childrens-lives/)  
780 [senegal-ministry-health-save-childrens-lives/](https://www.nutritionintl.org/2012/05/micronutrient-initiative-government-canada-teck-launch-new-initiative-senegal-ministry-health-save-childrens-lives/)
- 781 41. Laying the groundwork for universal health coverage in Senegal through sustainable financing | Results for  
782 Development [Internet]. [cited 2020 Jan 10]. Available from: [https://www.r4d.org/projects/laying-](https://www.r4d.org/projects/laying-groundwork-universal-health-coverage-senegal-sustainable-financing/)  
783 [groundwork-universal-health-coverage-senegal-sustainable-financing/](https://www.r4d.org/projects/laying-groundwork-universal-health-coverage-senegal-sustainable-financing/)
- 784 42. Reiner RC, Wiens KE, Deshpande A, Baumann MM, Lindstedt PA, Blacker BF, et al. Mapping geographical  
785 inequalities in childhood diarrhoeal morbidity and mortality in low-income and middle-income countries,  
786 2000–17: analysis for the Global Burden of Disease Study 2017. *The Lancet.* 2020 Jun 6;395(10239):1779–  
787 801.

788
